# Supplementary material for: Fire-footed rope squirrels (Funisciurus pyrropus) are a reservoir host of monkeypox virus (Orthopoxvirus monkeypox)
Source: Research Square preprint supplement (doi:10.21203/rs.3.rs-6322223/v1), 2025-04-08
Supplement: Supplementary file 1 [file 2c04e2cb836a2c98e25f7615.xlsx]

## Sheet: Supp. Table 1- Necropsies Mgb
Supplementary Table 1 - Overview of necropsy samples collected from the three dead mangabeys Molecular Detection of Monkeypoxvirus DNA in necropsy samples
Necropsy ID	Individual	Order name	Family name	Genus name	Species name	Common name	Sample type	Storage medium	Date	MPXV PCR	MPXV Copies/5µL	Capture and NGS	Genome coverage	Isolation atempt	Isolation
N230131	BB-Amboseli	Primates	Cercopithecidae	Cercocebus	Cercocebus atys	Sooty mangabey	Lung	None	2023-01-31	positive	2797.82	-	-	x	no
N230131	BB-Amboseli	Primates	Cercopithecidae	Cercocebus	Cercocebus atys	Sooty mangabey	Skin	None	2023-01-31	positive	201500	-	-	x	yes
N230131	BB-Amboseli	Primates	Cercopithecidae	Cercocebus	Cercocebus atys	Sooty mangabey	Maggots	None	2023-01-31	positive	708.299	-	-	x	no
N230131	BB-Amboseli	Primates	Cercopithecidae	Cercocebus	Cercocebus atys	Sooty mangabey	Spleen	NAP buffer	2023-01-31	positive	364.437	-	-
N230131	BB-Amboseli	Primates	Cercopithecidae	Cercocebus	Cercocebus atys	Sooty mangabey	Spleen	None	2023-01-31	positive	243.354	-	-	x	no
N230131	BB-Amboseli	Primates	Cercopithecidae	Cercocebus	Cercocebus atys	Sooty mangabey	Liver	NAP buffer	2023-01-31	positive	431.079	-	-	-	-
N230131	BB-Amboseli	Primates	Cercopithecidae	Cercocebus	Cercocebus atys	Sooty mangabey	Liver	None	2023-01-31	negative	-	-	-	-	-
N230131	BB-Amboseli	Primates	Cercopithecidae	Cercocebus	Cercocebus atys	Sooty mangabey	Lung	NAP buffer	2023-01-31	positive	335.872	x	complete 20x	-	-
N230131	BB-Amboseli	Primates	Cercopithecidae	Cercocebus	Cercocebus atys	Sooty mangabey	Skin	NAP buffer	2023-01-31	positive	534.159	x		-	-
N230131	BB-Amboseli	Primates	Cercopithecidae	Cercocebus	Cercocebus atys	Sooty mangabey	Maggots	NAP buffer	2023-01-31	positive	117.994	-	-	-	-
N230209	BB-Atacama	Primates	Cercopithecidae	Cercocebus	Cercocebus atys	Sooty mangabey	Spleen	NAP buffer	2023-02-09	positive	554.584	-	-	-	-
N230209	BB-Atacama	Primates	Cercopithecidae	Cercocebus	Cercocebus atys	Sooty mangabey	Liver	NAP buffer	2023-02-09	positive	356.196	-	-	-	-
N230209	BB-Atacama	Primates	Cercopithecidae	Cercocebus	Cercocebus atys	Sooty mangabey	Skin	None	2023-02-09	positive	86350	-	-	x	yes
N230209	BB-Atacama	Primates	Cercopithecidae	Cercocebus	Cercocebus atys	Sooty mangabey	Spleen	None	2023-02-09	positive	1238.11	x	partial 2x	x	no
N230209	BB-Atacama	Primates	Cercopithecidae	Cercocebus	Cercocebus atys	Sooty mangabey	Liver	None	2023-02-09	positive	259.335	x		-	-
N230209	BB-Atacama	Primates	Cercopithecidae	Cercocebus	Cercocebus atys	Sooty mangabey	Lung	None	2023-02-09	positive	1333.15	-	-	x	no
N230213	BB-Gishwati	Primates	Cercopithecidae	Cercocebus	Cercocebus atys	Sooty mangabey	Skin	NAP buffer	2023-02-13	positive	24.5469	-	-	-	-
N230213	BB-Gishwati	Primates	Cercopithecidae	Cercocebus	Cercocebus atys	Sooty mangabey	Spleen	NAP buffer	2023-02-13	positive	38.6115	-	-	-	-
N230213	BB-Gishwati	Primates	Cercopithecidae	Cercocebus	Cercocebus atys	Sooty mangabey	Liver	NAP buffer	2023-02-13	positive	32.3979	-	-	-	-
N230213	BB-Gishwati	Primates	Cercopithecidae	Cercocebus	Cercocebus atys	Sooty mangabey	Lung	NAP buffer	2023-02-13	positive	50.5216	-	-	-	-
N230213	BB-Gishwati	Primates	Cercopithecidae	Cercocebus	Cercocebus atys	Sooty mangabey	Skin	None	2023-02-13	positive	23.1455	x	partial 2x	x	no
N230213	BB-Gishwati	Primates	Cercopithecidae	Cercocebus	Cercocebus atys	Sooty mangabey	Spleen	None	2023-02-13	positive	26.4788	x		x	no
N230213	BB-Gishwati	Primates	Cercopithecidae	Cercocebus	Cercocebus atys	Sooty mangabey	Liver	None	2023-02-13	positive	9.84104	-	-	-	-
N230213	BB-Gishwati	Primates	Cercopithecidae	Cercocebus	Cercocebus atys	Sooty mangabey	Lung	None	2023-02-13	positive	11.2309	-	-	x	no
BB = Baby (infant) of

## Sheet: Supp. Table 2- Faeces 2022-2023
Supplementary Table 2 - Samples for Audrenisrou Group during the years 2022-2023 Molecular Detection of MPXV DNA in faeces
Extract ID	Individual	Sample type	Storage medium	Collection date	Collection time	MPXV PCR	MPXV Copies/5µL	Capture and NGS	Genome coverage	Isolation atempt	Isolation	Metabarcoding	Fire-footed rope squirrel DNA
NA_01000	Waho	Faeces	None	2022-10-01	13:31:00	negative	-	-	-	-	-	x	yes
NA_01001	Cayo	Faeces	None	2022-10-05	07:54:00	negative	-	-	-	-	-	x	no
NA_F00846	Cavally	Faeces	None	2022-10-05	14:07:00	negative	-	-	-	-	-	x	no
NA_01002	Meru	Faeces	None	2022-10-08	07:37:00	negative	-	-	-	-	-	x	no
NA_F00838	Amboseli	Faeces	None	2022-10-18	08:50:00	negative	-	-	-	-	-	x	no
NA_01003	Ndoki	Faeces	None	2022-10-19	10:11:00	negative	-	-	-	-	-	x	no
NA_01004	Ifrane	Faeces	None	2022-10-20	13:30:00	negative	-	-	-	-	-	x	no
NA_F00847	Cavally	Faeces	None	2022-11-06	13:02:00	negative	-	-	-	-	-	x	no
NA_01005	Malawi	Faeces	None	2022-11-10	09:21:00	negative	-	-	-	-	-	x	no
NA_F00843	Bako	Faeces	None	2022-11-11	12:30:00	negative	-	-	-	-	-	x	no
NA_F00872	Ramnagar	Faeces	None	2022-11-11	10:15:00	negative	-	-	-	-	-	x	no
NA_F00879	Titan	Faeces	None	2022-11-12	12:20:00	negative	-	-	-	-	-	x	no
NA_F00856	Hannibal	Faeces	None	2022-11-14	08:08:00	negative	-	-	-	-	-	x	no
NA_F00837	Amboseli	Faeces	None	2022-11-15	08:46:00	negative	-	-	-	-	-	x	no
NA_F00859	José	Faeces	None	2022-11-15	14:11:00	negative	-	-	-	-	-	x	no
NA_01006	Waho	Faeces	None	2022-11-16	08:24:00	negative	-	-	-	-	-	x	no
NA_F00880	Xavi	Faeces	None	2022-11-16	13:44:00	negative	-	-	-	-	-	x	no
NA_F00839	Amboseli	Faeces	None	2022-11-22	08:28:00	negative	-	-	-	-	-	x	no
NA_F00844	Bonair	Faeces	None	2022-11-22	13:47:00	negative	-	-	-	-	-	x	no
NA_F00858	Ifrane	Faeces	None	2022-11-23	15:11:00	negative	-	-	-	-	-	x	no
NA_F00861	Lavushi	Faeces	None	2022-11-23	08:32:00	negative	-	-	-	-	-	x	no
NA_F00871	Ndoki	Faeces	None	2022-11-26	10:05:00	negative	-	-	-	-	-	x	no
NA_F00876	Tasmani	Faeces	None	2022-11-26	16:10:00	negative	-	-	-	-	-	x	no
NA_F00878	Tiningua	Faeces	None	2022-11-27	16:19:00	negative	-	-	-	-	-	x	no
NA_F00868	Meru	Faeces	None	2022-11-27	10:18:00	negative	-	-	-	-	-	x	no
NA_F00864	Malawi	Faeces	None	2022-11-28	15:06:00	negative	-	-	-	-	-	x	no
NA_F00867	Manaus	Faeces	None	2022-11-28	08:31:00	negative	-	-	-	-	-	x	no
NA_F00849	Cavally	Faeces	None	2022-11-29	10:43:00	negative	-	-	-	-	-	x	no
NA_F00870	Mgahinga	Faeces	None	2022-11-29	12:07:00	negative	-	-	-	-	-	x	no
NA_F00874	Sonso	Faeces	None	2022-11-30	10:33:00	negative	-	-	-	-	-	x	no
NA_01007	Ramnagar	Faeces	None	2022-11-30	13:55:00	negative	-	-	-	-	-	x	no
NA_01009	Sonso	Faeces	None	2022-12-01	11:03:00	negative	-	-	-	-	-	x	no
NA_01010	Sonso	Faeces	None	2022-12-01	14:51:00	negative	-	-	-	-	-	x	no
NA_F00862	Lusaka	Faeces	None	2022-12-01	08:38:00	negative	-	-	-	-	-	x	no
NA_01011	Sonso	Faeces	None	2022-12-02	11:13:00	negative	-	-	-	-	-	x	no
NA_01012	Sonso	Faeces	None	2022-12-02	14:05:00	negative	-	-	-	-	-	x	no
NA_F00850	Cayo	Faeces	None	2022-12-02	08:02:00	negative	-	-	-	-	-	x	no
NA_F00836	Amazon	Faeces	None	2022-12-02	15:57:00	negative	-	-	-	-	-	x	no
NA_01013	Sonso	Faeces	None	2022-12-03	07:33:00	negative	-	-	-	-	-	x	no
NA_01014	Sonso	Faeces	None	2022-12-03	14:03:00	negative	-	-	-	-	-	x	no
NA_F00851	Cayo	Faeces	None	2022-12-04	16:32:00	negative	-	-	-	-	-	x	no
NA_F00852	Gishwati	Faeces	None	2022-12-04	07:42:00	negative	-	-	-	-	-	x	no
NA_01015	Sonso	Faeces	None	2022-12-05	16:07:00	negative	-	-	-	-	-	x	no
NA_F00875	Tasmani	Faeces	None	2022-12-05	09:58:00	negative	-	-	-	-	-	x	no
NA_F00840	Atacama	Faeces	None	2022-12-05	14:17:00	negative	-	-	-	-	-	x	no
NA_F00873	Sonso	Faeces	None	2022-12-05	10:47:00	negative	-	-	-	-	-	x	no
NA_F00845	Bza	Faeces	None	2022-12-06	07:28:00	negative	-	-	-	-	-	x	no
NA_F00860	Langtang	Faeces	None	2022-12-06	12:39:00	negative	-	-	-	-	-	x	no
NA_F00842	Bako	Faeces	None	2022-12-06	06:54:00	positive	3.55	-	-	-	-	x	yes
NA_01016	Meru	Faeces	None	2022-12-07	09:10:00	negative	-	-	-	-	-	x	no
NA_01017	Ndoki	Faeces	None	2022-12-07	13:40:00	negative	-	-	-	-	-	x	no
NA_F00848	Cavally	Faeces	None	2022-12-08	08:58:00	negative	-	-	-	-	-	x	no
NA_F00855	Hannibal	Faeces	None	2022-12-08	13:34:00	negative	-	-	-	-	-	x	no
NA_01019	Lavushi	Faeces	None	2022-12-09	12:42:00	negative	-	-	-	-	-	x	no
NA_01018	Bako	Faeces	None	2022-12-09	07:29:00	positive	11.7	-	-	-	-	x	no
NA_01020	Meru	Faeces	None	2022-12-10	11:46:00	negative	-	-	-	-	-	x	no
NA_F00857	Ifrane	Faeces	None	2022-12-10	15:16:00	negative	-	-	-	-	-	x	no
NA_F00865	Manaus	Faeces	None	2022-12-10	11:46:00	negative	-	-	-	-	-	x	no
NA_01021	Lusaka	Faeces	None	2022-12-11	07:34:00	negative	-	-	-	-	-	x	no
NA_01022	Malawi	Faeces	None	2022-12-11	11:59:00	negative	-	-	-	-	-	x	no
NA_F00866	Manaus	Faeces	None	2022-12-12	08:29:00	negative	-	-	-	-	-	x	no
NA_F00869	Mgahinga	Faeces	None	2022-12-12	12:28:00	negative	-	-	-	-	-	x	no
NA_01023	Ndoki	Faeces	None	2022-12-13	07:59:00	negative	-	-	-	-	-	x	no
NA_01024	Ramnagar	Faeces	None	2022-12-13	13:24:00	negative	-	-	-	-	-	x	no
NA_01025	Samburu	Faeces	None	2022-12-14	10:17:00	negative	-	-	-	-	-	x	no
NA_01026	Tasmani	Faeces	None	2022-12-14	13:03:00	negative	-	-	-	-	-	x	no
NA_01028	Waho	Faeces	None	2022-12-17	13:40:00	negative	-	-	-	-	-	x	no
NA_F00881	Xavi	Faeces	None	2022-12-17	11:58:00	negative	-	-	-	-	-	x	no
NA_01029	Amboseli	Faeces	None	2022-12-18	09:44:00	negative	-	-	-	-	-	x	no
NA_01030	Bako	Faeces	None	2022-12-18	13:09:00	positive	253.5	-	-	-	-	x	no
NA_01031	Amazon	Faeces	None	2022-12-19	09:18:00	negative	-	-	-	-	-	x	no
NA_F00853	Gishwati	Faeces	None	2022-12-19	14:05:00	negative	-	-	-	-	-	x	no
NA_F00841	Atacama	Faeces	None	2022-12-20	13:26:00	negative	-	-	-	-	-	x	no
NA_F00877	Tiningua	Faeces	None	2022-12-20	11:18:00	negative	-	-	-	-	-	x	no
NA_01033	Tasmani	Faeces	None	2022-12-30	11:41:00	negative	-	-	-	-	-	x	no
NA_01034	Bako	Faeces	None	2022-12-30	15:47:00	negative	-	-	-	-	-	x	no
NA_F00854	Gishwati	Faeces	None	2022-12-31	09:12:00	negative	-	-	-	-	-	x	no
NA_01035	Tiningua	Faeces	None	2022-12-31	16:32:00	negative	-	-	-	-	-	x	no
NA_01037	Meru	Faeces	None	2023-01-03	10:48:00	negative	-	-	-	-	-	-	-
NA_01036	Ifrane	Faeces	None	2023-01-03	16:26:00	negative	-	-	-	-	-	-	-
NA_01038	Atacama	Faeces	None	2023-01-04	09:46:00	negative	-	-	-	-	-	-	-
NA_01039	Bza	Faeces	None	2023-01-04	16:09:00	positive	3.96	-	-	-	-	-	-
NA_01040	Langtang	Faeces	None	2023-01-05	08:37:00	negative	-	-	-	-	-	-	-
NA_01041	Xavi	Faeces	None	2023-01-05	16:49:00	negative	-	-	-	-	-	-	-
NA_01043	José	Faeces	None	2023-01-06	11:45:00	negative	-	-	-	-	-	-	-
NA_F00078	Amazon	Faeces	None	2023-01-06	16:35:00	negative	-	-	-	-	-	-	-
NA_01045	Lavushi	Faeces	None	2023-01-08	14:10:00	negative	-	-	-	-	-	-	-
NA_00079	Bonair	Faeces	None	2023-01-08	11:56:00	negative	-	-	-	-	-	-	-
NA_01046	Amboseli	Faeces	None	2023-01-09	10:25:00	positive	177	-	-	-	-	-	-
NA_01047	Lusaka	Faeces	None	2023-01-09	13:18:00	negative	-	-	-	-	-	-	-
NA_01048	Ndoki	Faeces	None	2023-01-10	10:07:00	negative	-	-	-	-	-	-	-
NA_01049	Ramnagar	Faeces	None	2023-01-10	13:08:00	negative	-	-	-	-	-	-	-
NA_01050	Amazon	Faeces	None	2023-01-12	10:00:00	negative	-	-	-	-	-	-	-
NA_01051	Cavally	Faeces	None	2023-01-12	12:10:00	negative	-	-	-	-	-	-	-
NA_01052	Amboseli	Faeces	None	2023-01-13	09:07:00	positive	5.7	-	-	-	-	-	-
NA_01053	Mgahinga	Faeces	None	2023-01-14	09:48:00	negative	-	-	-	-	-	-	-
NA_01054	Tiningua	Faeces	None	2023-01-14	16:14:00	negative	-	-	-	-	-	-	-
NA_01055	Lusaka	Faeces	None	2023-01-15	11:57:00	negative	-	-	-	-	-	-	-
NA_01056	Meru	Faeces	None	2023-01-15	09:22:00	negative	-	-	-	-	-	-	-
NA_01057	Bako	Faeces	None	2023-01-16	14:33:00	negative	-	-	-	-	-	-	-
NA_01058	Bza	Faeces	None	2023-01-16	09:01:00	negative	-	-	-	-	-	-	-
NA_01059	Atacama	Faeces	None	2023-01-17	10:48:00	negative	-	-	-	-	-	-	-
NA_00098	Bonair	Faeces	None	2023-01-17	15:07:00	negative	-	-	-	-	-	-	-
NA_01060	Langtang	Faeces	None	2023-01-18	10:31:00	negative	-	-	-	-	-	-	-
NA_01061	Ndoki	Faeces	None	2023-01-18	13:38:00	positive	17.05	-	-	-	-	-	-
NA_01062	Cayo	Faeces	None	2023-01-19	12:02:00	negative	-	-	-	-	-	-	-
NA_01064	Hannibal	Faeces	None	2023-01-19	14:45:00	negative	-	-	-	-	-	-	-
NA_01065	Xavi	Faeces	None	2023-01-24	11:31:00	negative	-	-	-	-	-	-	-
NA_00109	Cavally	Faeces	None	2023-01-24	12:31:00	negative	-	-	-	-	-	-	-
NA_00110	Lavushi	Faeces	None	2023-01-24	10:56:00	positive	4.68	-	-	-	-	-	-
NA_F00112	Sonso	Faeces	None	2023-01-25	16:55:00	negative	-	-	-	-	-	-	-
NA_F00111	Malawi	Faeces	None	2023-01-25	08:59:00	positive	0.616	-	-	-	-	-	-
NA_01066	Waho	Faeces	None	2023-01-26	13:30:00	negative	-	-	-	-	-	-	-
NA_01067	Ramnagar	Faeces	None	2023-01-26	10:29:00	positive	20.05	-	-	x	no	-	-
NA_F00119	Titan	Faeces	None	2023-01-27	13:27:00	negative	-	-	-	-	-	-	-
NA_01068	Titan	Faeces	None	2023-01-27	14:27:00	negative	-	-	-	-	-	-	-
NA_F00117	Tasmani	Faeces	None	2023-01-27	10:29:00	positive	0.2505	-	-	-	-	-	-
NA_F00121	José	Faeces	None	2023-01-28	15:57:00	negative	-	-	-	-	-	-	-
NA_01069	Amboseli	Faeces	None	2023-01-29	16:57:00	positive	14.2	-	-	-	-	-	-
NA_F00123	Amboseli	Faeces	None	2023-01-29	17:57:00	positive	7.60447	-	-	-	-	-	-
NA_01070	Amboseli	Faeces	None	2023-01-30	11:37:00	positive	1205	-	-	-	-	-	-
NA_01071	Amboseli	Faeces	None	2023-01-31	09:48:00	positive	1300	-	-	-	-	-	-
NA_F00131	Amboseli	Faeces	None	2023-02-01	09:12:00	positive	4730	-	-	x	no	-	-
NA_00129	Amazon	Faeces	None	2023-02-01	14:14:00	negative	-	-	-	-	-	-	-
NA_F00132	Lusaka	Faeces	None	2023-02-01	14:11:00	negative	-	-	-	-	-	-	-
NA_F00135	Bonair	Faeces	None	2023-02-01	14:17:00	positive	272	-	-	-	-	-	-
NA_F00136	Bako	Faeces	None	2023-02-02	08:15:00	negative	-	-	-	-	-	-	-
NA_F00138	Atacama	Faeces	None	2023-02-02	08:20:00	positive	14.587	-	-	-	-	-	-
NA_F00140	Couscous	Faeces	None	2023-02-02	12:43:00	positive	176.5	-	-	x	no	-	-
NA_F00146	Amboseli	Faeces	None	2023-02-03	11:08:00	positive	0.724	-	-	-	-	-	-
NA_F00148	Ramnagar	Faeces	None	2023-02-03	16:02:00	negative	-	-	-	-	-	-	-
NA_F00143	Auriane	Faeces	None	2023-02-03	09:52:00	positive	0.902	-	-	-	-	-	-
NA_F00144	Cavally	Faeces	None	2023-02-03	11:20:00	positive	0.597	-	-	-	-	-	-
NA_F00147	Gishwati	Faeces	None	2023-02-03	11:00:00	positive	428.825	-	-	x	no	-	-
NA_F00149	Amboseli	Faeces	None	2023-02-04	08:51:00	positive	0.885	-	-	-	-	-	-
NA_F00150	Ifrane	Faeces	None	2023-02-04	16:42:00	negative	-	-	-	-	-	-	-
NA_F00151	Gishwati	Faeces	None	2023-02-04	11:35:00	positive	676.105	-	-	-	-	-	-
NA_F00156	Atacama	Faeces	None	2023-02-05	11:57:00	negative	-	-	-	-	-	-	-
NA_F00152	Ndoki	Faeces	None	2023-02-05	14:26:00	negative	-	-	-	-	-	-	-
NA_F00158	Manaus	Faeces	None	2023-02-06	11:54:00	negative	-	-	-	-	-	-	-
NA_F00159	Yassa	Faeces	None	2023-02-06	13:27:00	negative	-	-	-	-	-	-	-
NA_F00161	Mgahinga	Faeces	None	2023-02-06	09:52:00	positive	0.189279	-	-	-	-	-	-
NA_F00165	Ramnagar	Faeces	None	2023-02-07	07:59:00	negative	-	-	-	-	-	-	-
NA_F00164	Lavushi	Faeces	None	2023-02-07	12:36:00	positive	100.903	-	-	x	no	-	-
NA_F00162	Lusaka	Faeces	None	2023-02-07	12:07:00	positive	23.5823	-	-	x	no	-	-
SON 09.02.23 Faeces NAP	Sonso	Faeces	NAP buffer	2023-02-09	-	negative	-	-	-	-	-	-	-
BB BON 11.02.23 Faeces NAP	BB-Bonair	Faeces	NAP buffer	2023-02-11	-	negative	-	-	-	-	-	-	-
NA_F00172	Lavushi	Faeces	None	2023-02-12	14:53:00	negative	-	-	-	-	-	-	-
NA_F00170	Meru	Faeces	None	2023-02-12	07:55:00	negative	-	-	-	-	-	-	-
NA_F00171	Gishwati	Faeces	None	2023-02-12	15:28:00	positive	1483.99	x	complete 20x	-	-	-	-
MAN 13.02.23 Faeces NAP	Manaus	Faeces	NAP buffer	2023-02-13	-	negative	-	-	-	-	-	-	-
RAM 13.02.23 Faeces NAP	Ramnagar	Faeces	NAP buffer	2023-02-13	-	negative	-	-	-	-	-	-	-
TOF 13.02.23 Faeces	Toffee	Faeces	NAP buffer	2023-02-13	-	negative	-	-	-	-	-	-	-
NA_F00174	Ali	Faeces	None	2023-02-13	09:02:00	negative	-	-	-	-	-	-	-
NA_F00175	Xavi	Faeces	None	2023-02-13	08:56:00	negative	-	-	-	-	-	-	-
NA_F00181	Amboseli	Faeces	None	2023-02-14	15:55:00	positive	2.84	-	-	-	-	-	-
NA_F00177	Atacama	Faeces	None	2023-02-14	15:36:00	positive	46.1847	x	partial 2x	x	no	-	-
NA_F00179	José	Faeces	None	2023-02-14	13:24:00	negative	-	-	-	-	-	-	-
NA_F00183	Nikini	Faeces	NAP buffer	2023-02-14	09:42:00	negative	-	-	-	-	-	-	-
NA_F00187	Bonair	Faeces	None	2023-02-15	11:31:00	positive	7.025	-	-	-	-	-	-
NA_F00184	Cayo	Faeces	None	2023-02-15	15:04:00	positive	76.5611	-	-	x	no	-	-
NA_F00186	Lusaka	Faeces	None	2023-02-15	14:21:00	negative	-	-	-	-	-	-	-
NA_F00191	Atacama	Faeces	None	2023-02-16	17:40:00	positive	1.86	-	-	-	-	-	-
NA_F00188	Cavally	Faeces	None	2023-02-16	12:10:00	positive	85.9854	x	partial 2x	x	no	-	-
NA_F00197	Bza	Faeces	None	2023-02-17	12:49:00	negative	-	-	-	-	-	-	-
NA_F00200	Voila	Faeces	None	2023-02-20	09:21:00	positive	278.645	x	partial 2x	x	no	-	-
NA_F00201	Meru	Faeces	None	2023-02-21	10:56:00	positive	0.331924	-	-	-	-	-	-
NA_F00206	Mgahinga	Faeces	NAP buffer	2023-02-22	08:00:00	negative	-	-	-	-	-	-	-
NA_F00212	Amazon	Faeces	None	2023-02-24	10:15:00	positive	0.331924	-	-	-	-	-	-
NA_F00210	Lusaka	Faeces	None	2023-02-24	10:15:00	positive	2.395	-	-	-	-	-	-
NA_F00209	Cayo	Faeces	None	2023-02-24	13:20:00	negative	-	-	-	-	-	-	-
NA_F00227	Cavally	Faeces	None	2023-02-28	10:52:00	negative	-	-	-	-	-	-	-
NA_F00228	Amboseli	Faeces	NAP buffer	2023-02-28	08:14:00	negative	-	-	-	-	-	-	-
NA_F00229	Ramnagar	Faeces	None	2023-03-01	09:55:00	positive	0.234	-	-	-	-	-	-
NA_F00244	Tiningua	Faeces	NAP buffer	2023-03-07	08:12:00	positive	4.515	-	-	-	-	-	-
NA_F00253	Atacama	Faeces	None	2023-03-11	09:31:00	positive	0.88	-	-	-	-	-	-
NA_F00252	Meru	Faeces	None	2023-03-11	15:38:00	positive	638	-	-	x	no	-	-
NA_F00249	Lusaka	Faeces	None	2023-03-11	13:07:00	negative	-	-	-	-	-	-	-
NA_F00251	Lavushi	Faeces	None	2023-03-11	08:55:00	negative	-	-	-	-	-	-	-
NA_F00264	Bonair	Faeces	None	2023-03-12	11:15:00	negative	-	-	-	-	-	-	-
NA_F00259	Milou	Faeces	None	2023-03-12	12:29:00	negative	-	-	-	-	-	-	-
NA_F00265	Manaus	Faeces	None	2023-03-13	08:07:00	negative	-	-	-	-	-	-	-
NA_F00273	Amazon	Faeces	None	2023-03-13	08:23:00	negative	-	-	-	-	-	-	-
NA_F00276	Bilbo	Faeces	None	2023-03-13	09:29:00	negative	-	-	-	-	-	-	-
NA_F00277	Mgahinga	Faeces	None	2023-03-14	17:38:00	negative	-	-	-	-	-	-	-
NA_F00281	Xavi	Faeces	None	2023-03-14	11:01:00	negative	-	-	-	-	-	-	-
NA_F00287	Lavushi	Faeces	None	2023-03-14	09:41:00	negative	-	-	-	-	-	-	-
NA_F00290	Ifrane	Faeces	None	2023-03-14	08:24:00	negative	-	-	-	-	-	-	-
NA_F00288	Tasmani	Faeces	None	2023-03-14	07:43:00	negative	-	-	-	-	-	-	-
NA_F00283	Simenti	Faeces	None	2023-03-14	08:40:00	negative	-	-	-	-	-	-	-
NA_F00284	Siamang	Faeces	None	2023-03-14	08:47:00	negative	-	-	-	-	-	-	-
NA_F00291	Voila	Faeces	NAP buffer	2023-03-15	07:25:00	negative	-	-	-	-	-	-	-
NA_F00292	Lavushi	Faeces	None	2023-03-15	15:24:00	negative	-	-	-	-	-	-	-
NA_F00299	Couscous	Faeces	None	2023-03-15	11:59:00	negative	-	-	-	-	-	-	-
NA_F00303	Malawi	Faeces	None	2023-03-16	11:36:00	positive	3.34	-	-	-	-	-	-
NA_F00301	Bako	Faeces	None	2023-03-16	08:12:00	negative	-	-	-	-	-	-	-
NA_F00311	Voila	Faeces	None	2023-03-16	09:05:00	negative	-	-	-	-	-	-	-
NA_F00304	Hannibal	Faeces	None	2023-03-16	14:40:00	negative	-	-	-	-	-	-	-
NA_F00307	Lukuru	Faeces	None	2023-03-16	10:11:00	negative	-	-	-	-	-	-	-
NA_F00321	Ryan	Faeces	None	2023-03-17	09:50:00	positive	2.015	-	-	-	-	-	-
NA_F00317	José	Faeces	None	2023-03-17	12:31:00	negative	-	-	-	-	-	-	-
NA_F00316	Lavushi	Faeces	None	2023-03-17	10:16:00	negative	-	-	-	-	-	-	-
NA_F00325	Ramnagar	Faeces	None	2023-03-17	08:45:00	negative	-	-	-	-	-	-	-
NA_F00323	Zoro	Faeces	None	2023-03-17	09:05:00	negative	-	-	-	-	-	-	-
NA_F00333	Lavushi	Faeces	None	2023-03-19	11:00:00	negative	-	-	-	-	-	-	-
NA_F00327	Ramnagar	Faeces	None	2023-03-19	09:35:00	negative	-	-	-	-	-	-	-
NA_F00328	Atacama	Faeces	None	2023-03-19	10:57:00	negative	-	-	-	-	-	-	-
NA_F00344	Tiningua	Faeces	None	2023-03-21	08:49:00	positive	16.2	-	-	x	no	-	-
NA_F00339	Mgahinga	Faeces	None	2023-03-21	15:07:00	negative	-	-	-	-	-	-	-
NA_F00342	Manaus	Faeces	None	2023-03-21	12:13:00	negative	-	-	-	-	-	-	-
NA_F00345	Bonair	Faeces	None	2023-03-21	07:54:00	negative	-	-	-	-	-	-	-
NA_F00348	Simenti	Faeces	None	2023-03-21	12:32:00	negative	-	-	-	-	-	-	-
NA_F00338	Ramnagar	Faeces	None	2023-03-21	09:16:00	negative	-	-	-	-	-	-	-
NA_F00336	Xavi	Faeces	None	2023-03-21	17:41:00	negative	-	-	-	-	-	-	-
NA_F00337	Cusco	Faeces	None	2023-03-21	14:46:00	negative	-	-	-	-	-	-	-
NA_F00362	Meru	Faeces	None	2023-03-22	08:36:00	negative	-	-	-	-	-	-	-
NA_F00349	Bako	Faeces	None	2023-03-22	09:10:00	negative	-	-	-	-	-	-	-
NA_F00354	José	Faeces	None	2023-03-22	14:58:00	negative	-	-	-	-	-	-	-
NA_F00373	Lusaka	Faeces	None	2023-03-23	15:30:00	negative	-	-	-	-	-	-	-
NA_F00369	Bako	Faeces	None	2023-03-23	14:46:00	negative	-	-	-	-	-	-	-
NA_F00372	José	Faeces	None	2023-03-23	08:11:00	negative	-	-	-	-	-	-	-
NA_F00367	Lavushi	Faeces	None	2023-03-23	08:59:00	negative	-	-	-	-	-	-	-
NA_F00383	Lavushi	Faeces	None	2023-03-24	09:26:00	negative	-	-	-	-	-	-	-
NA_F00375	Ocean	Faeces	None	2023-03-24	16:58:00	negative	-	-	-	-	-	-	-
NA_F00384	BB-Lusaka	Faeces	NAP buffer	2023-03-25	08:41:00	negative	-	-	-	-	-	-	-
NA_F00387	Amazon	Faeces	None	2023-03-26	14:04:00	negative	-	-	-	-	-	-	-
NA_F00388	José	Faeces	None	2023-03-26	08:54:00	negative	-	-	-	-	-	-	-
NA_F00385	Ramnagar	Faeces	None	2023-03-26	13:49:00	negative	-	-	-	-	-	-	-
NA_F00402	Bako	Faeces	None	2023-03-27	15:22:00	negative	-	-	-	-	-	-	-
NA_F00396	Simenti	Faeces	None	2023-03-27	07:22:00	negative	-	-	-	-	-	-	-
NA_F00401	Xavi	Faeces	None	2023-03-27	12:50:00	negative	-	-	-	-	-	-	-
NA_F00403	Ngiro	Faeces	None	2023-03-27	09:08:00	negative	-	-	-	-	-	-	-
NA_F00415	Bako	Faeces	None	2023-03-28	08:01:00	negative	-	-	-	-	-	-	-
NA_F00420	Tiningua	Faeces	None	2023-03-30	12:54:00	negative	-	-	-	-	-	-	-
NA_F00416	Simenti	Faeces	None	2023-03-30	11:57:00	negative	-	-	-	-	-	-	-
NA_F00423	Bonair	Faeces	None	2023-03-31	07:39:00	negative	-	-	-	-	-	-	-
NA_F00425	Mgahinga	Faeces	None	2023-04-01	13:48:00	negative	-	-	-	-	-	-	-
NA_F00426	Ramnagar	Faeces	None	2023-04-01	07:36:00	negative	-	-	-	-	-	-	-
NA_F00433	Sonso	Faeces	None	2023-04-03	13:44:00	negative	-	-	-	-	-	-	-
NA_F00437	Manaus	Faeces	None	2023-04-04	12:54:00	negative	-	-	-	-	-	-	-
NA_F00438	Amazon	Faeces	None	2023-04-04	11:33:00	negative	-	-	-	-	-	-	-
NA_F00439	Lusaka	Faeces	None	2023-04-05	09:05:00	negative	-	-	-	-	-	-	-
NA_F00440	Lavushi	Faeces	None	2023-04-05	14:23:00	negative	-	-	-	-	-	-	-
NA_F00447	Amazon	Faeces	None	2023-04-07	11:45:00	negative	-	-	-	-	-	-	-
NA_F00445	Bza	Faeces	None	2023-04-07	07:41:00	negative	-	-	-	x	no	-	-
NA_F00444	Lukuru	Faeces	None	2023-04-07	10:59:00	negative	-	-	-	-	-	-	-
NA_F00450	Meru	Faeces	None	2023-04-08	15:16:00	negative	-	-	-	-	-	-	-
NA_F00448	Hannibal	Faeces	None	2023-04-08	10:02:00	negative	-	-	-	-	-	-	-
NA_F00452	Voila	Faeces	None	2023-04-09	11:14:00	negative	-	-	-	-	-	-	-
NA_F00463	Bako	Faeces	None	2023-04-10	09:09:00	negative	-	-	-	-	-	-	-
NA_F00460	José	Faeces	None	2023-04-10	14:12:00	negative	-	-	-	-	-	-	-
NA_F00471	Bonair	Faeces	None	2023-04-11	08:40:00	negative	-	-	-	-	-	-	-
NA_F00467	Amboseli	Faeces	None	2023-04-11	09:26:00	negative	-	-	-	-	-	-	-
NA_F00469	Nikini	Faeces	None	2023-04-11	15:47:00	negative	-	-	-	-	-	-	-
NA_F00465	Saruman	Faeces	None	2023-04-11	10:04:00	negative	-	-	-	-	-	-	-
NA_F00476	Amazon	Faeces	None	2023-04-13	15:59:00	negative	-	-	-	-	-	-	-
NA_F00477	Bako	Faeces	None	2023-04-13	11:00:00	negative	-	-	-	-	-	-	-
NA_F00479	Danane	Faeces	None	2023-04-13	09:17:00	negative	-	-	-	-	-	-	-
NA_F00474	Tasmani	Faeces	None	2023-04-13	10:12:00	negative	-	-	-	-	-	-	-
NA_F00481	Mgahinga	Faeces	None	2023-04-14	10:29:00	negative	-	-	-	-	-	-	-
NA_F00486	Manaus	Faeces	None	2023-04-14	09:07:00	negative	-	-	-	-	-	-	-
NA_F00485	Gishwati	Faeces	None	2023-04-14	11:27:00	negative	-	-	-	-	-	-	-
NA_F00482	Lencois	Faeces	None	2023-04-14	13:07:00	negative	-	-	-	-	-	-	-
NA_F00488	Meru	Faeces	None	2023-04-15	10:39:00	negative	-	-	-	-	-	-	-
NA_F00487	Voila	Faeces	None	2023-04-15	09:20:00	negative	-	-	-	-	-	-	-
NA_F00489	Cavally	Faeces	None	2023-04-15	15:27:00	negative	-	-	-	-	-	-	-
NA_F00493	Tiningua	Faeces	None	2023-04-16	15:09:00	negative	-	-	-	-	-	-	-
NA_F00497	Amazon	Faeces	None	2023-04-16	13:01:00	negative	-	-	-	-	-	-	-
NA_F00500	Lusaka	Faeces	None	2023-04-17	10:59:00	negative	-	-	-	-	-	-	-
NA_F00504	Ndoki	Faeces	None	2023-04-18	09:20:00	negative	-	-	-	-	-	-	-
NA_F00505	Amazon	Faeces	None	2023-04-18	13:51:00	negative	-	-	-	-	-	-	-
NA_F00516	Meru	Faeces	None	2023-04-21	15:19:00	negative	-	-	-	-	-	-	-
NA_F00513	José	Faeces	None	2023-04-21	07:12:00	negative	-	-	-	-	-	-	-
NA_F00518	Waho	Faeces	None	2023-04-21	13:00:00	negative	-	-	-	-	-	-	-
NA_F00519	Mgahinga	Faeces	None	2023-04-22	13:35:00	negative	-	-	-	-	-	-	-
NA_F00522	Tiningua	Faeces	None	2023-04-22	17:29:00	negative	-	-	-	-	-	-	-
NA_F00523	Xavi	Faeces	None	2023-04-22	13:38:00	negative	-	-	-	-	-	-	-
NA_F00527	Amazon	Faeces	None	2023-04-23	08:20:00	negative	-	-	-	-	-	-	-
NA_F00524	Ndoki	Faeces	None	2023-04-23	07:53:00	negative	-	-	-	-	-	-	-
NA_F00532	Mgahinga	Faeces	None	2023-04-24	07:48:00	negative	-	-	-	-	-	-	-
NA_F00534	Ndoki	Faeces	None	2023-04-24	15:59:00	negative	-	-	-	-	-	-	-
NA_F00529	Yassa	Faeces	None	2023-04-24	10:25:00	negative	-	-	-	-	-	-	-
NA_F00535	Auriane	Faeces	None	2023-04-25	11:22:00	negative	-	-	-	-	-	-	-
NA_F00536	Babylon	Faeces	None	2023-04-25	11:59:00	negative	-	-	-	-	-	-	-
NA_F00540	Cayo	Faeces	None	2023-04-27	07:22:00	negative	-	-	-	-	-	-	-
NA_F00541	Titan	Faeces	None	2023-04-27	07:49:00	negative	-	-	-	-	-	-	-
NA_F00547	Manaus	Faeces	None	2023-05-04	08:19:00	negative	-	-	-	-	-	-	-
NA_F00546	Bonair	Faeces	None	2023-05-04	10:21:00	negative	-	-	-	-	-	-	-
NA_F00551	Tiningua	Faeces	None	2023-05-04	08:06:00	negative	-	-	-	-	-	-	-
NA_F00564	Meru	Faeces	None	2023-05-05	08:10:00	negative	-	-	-	-	-	-	-
NA_F00557	Lusaka	Faeces	None	2023-05-05	08:19:00	negative	-	-	-	-	-	-	-
NA_F00556	Tiningua	Faeces	None	2023-05-05	08:15:00	negative	-	-	-	-	-	-	-
NA_F00553	Ocean	Faeces	None	2023-05-05	07:06:00	negative	-	-	-	-	-	-	-
NA_F00567	Mgahinga	Faeces	None	2023-05-07	07:45:00	negative	-	-	-	-	-	-	-
NA_F00573	Mousse	Faeces	None	2023-05-07	09:27:00	negative	-	-	-	-	-	-	-
NA_F00572	Ali	Faeces	None	2023-05-07	12:38:00	negative	-	-	-	-	-	-	-
NA_F00590	Manaus	Faeces	None	2023-05-09	11:22:00	negative	-	-	-	-	-	-	-
NA_F00584	Lusaka	Faeces	None	2023-05-09	08:19:00	negative	-	-	-	-	-	-	-
NA_F00593	Ndoki	Faeces	None	2023-05-09	14:10:00	negative	-	-	-	-	-	-	-
NA_F00596	Lavushi	Faeces	None	2023-05-09	16:04:00	negative	-	-	-	-	-	-	-
NA_F00589	Lukuru	Faeces	None	2023-05-09	16:39:00	negative	-	-	-	-	-	-	-
NA_F00600	Ndoki	Faeces	None	2023-05-10	08:08:00	negative	-	-	-	-	-	-	-
NA_F00612	Voila	Faeces	None	2023-05-11	09:43:00	negative	-	-	-	-	-	-	-
NA_F00604	Bonair	Faeces	None	2023-05-11	17:25:00	negative	-	-	-	-	-	-	-
NA_F00609	Ndoki	Faeces	None	2023-05-11	08:38:00	negative	-	-	-	-	-	-	-
NA_F00615	Couscous	Faeces	None	2023-05-11	14:58:00	negative	-	-	-	-	-	-	-
NA_F00614	Leo	Faeces	None	2023-05-11	09:15:00	negative	-	-	-	-	-	-	-
NA_F00611	Simenti	Faeces	None	2023-05-11	10:38:00	negative	-	-	-	-	-	-	-
NA_F00617	Lusaka	Faeces	None	2023-05-12	08:27:00	negative	-	-	-	-	-	-	-
NA_F00618	Tiningua	Faeces	None	2023-05-12	10:38:00	negative	-	-	-	-	-	-	-
NA_F00624	Tempura	Faeces	None	2023-05-12	10:56:00	negative	-	-	-	-	-	-	-
NA_F00639	Meru	Faeces	None	2023-05-14	07:55:00	negative	-	-	-	-	-	-	-
NA_F00633	Voila	Faeces	None	2023-05-14	14:40:00	negative	-	-	-	-	-	-	-
NA_F00640	Lusaka	Faeces	None	2023-05-14	10:22:00	negative	-	-	-	-	-	-	-
NA_F00638	Amazon	Faeces	None	2023-05-14	06:55:00	negative	-	-	-	-	-	-	-
NA_F00636	Bioko	Faeces	None	2023-05-14	14:42:00	negative	-	-	-	-	-	-	-
NA_F00631	Parcival	Faeces	None	2023-05-14	12:04:00	negative	-	-	-	-	-	-	-
NA_F00642	Lusaka	Faeces	None	2023-05-15	15:11:00	negative	-	-	-	-	-	-	-
NA_F00644	Siamang	Faeces	None	2023-05-15	15:08:00	negative	-	-	-	-	-	-	-
NA_F00659	Lusaka	Faeces	None	2023-05-16	08:42:00	negative	-	-	-	-	-	-	-
NA_F00650	Ndoki	Faeces	None	2023-05-16	13:23:00	negative	-	-	-	-	-	-	-
NA_F00653	Tiningua	Faeces	None	2023-05-16	10:09:00	negative	-	-	-	-	-	-	-
NA_F00656	Malawi	Faeces	None	2023-05-16	13:03:00	negative	-	-	-	-	-	-	-
NA_F00651	Gishwati	Faeces	None	2023-05-16	16:39:00	negative	-	-	-	-	-	-	-
NA_F00655	Ramnagar	Faeces	None	2023-05-16	19:01:00	negative	-	-	-	-	-	-	-
NA_F00665	Tiningua	Faeces	None	2023-05-17	09:55:00	negative	-	-	-	-	-	-	-
NA_F00673	Mgahinga	Faeces	None	2023-05-17	09:59:00	negative	-	-	-	-	-	-	-
NA_F00683	Lusaka	Faeces	None	2023-05-18	10:20:00	negative	-	-	-	-	-	-	-
NA_F00681	Atacama	Faeces	None	2023-05-18	17:06:00	negative	-	-	-	-	-	-	-
NA_F00688	Manaus	Faeces	None	2023-05-19	14:20:00	negative	-	-	-	-	-	-	-
NA_F00689	Voila	Faeces	None	2023-05-19	10:50:00	negative	-	-	-	-	-	-	-
NA_F00693	Lusaka	Faeces	None	2023-05-19	16:35:00	negative	-	-	-	-	-	-	-
NA_F00687	Ifrane	Faeces	None	2023-05-19	10:01:00	negative	-	-	-	-	-	-	-
NA_F00698	Bonair	Faeces	None	2023-05-21	08:17:00	negative	-	-	-	-	-	-	-
NA_F00709	Meru	Faeces	None	2023-05-22	12:58:00	negative	-	-	-	-	-	-	-
NA_F00719	Bonair	Faeces	None	2023-06-02	08:28:00	negative	-	-	-	-	-	-	-
NA_F00716	Cusco	Faeces	None	2023-06-02	07:50:00	negative	-	-	-	-	-	-	-
NA_F00732	Meru	Faeces	None	2023-06-03	10:36:00	negative	-	-	-	-	-	-	-
NA_F00724	Voila	Faeces	None	2023-06-03	08:47:00	negative	-	-	-	-	-	-	-
NA_F00727	Amboseli	Faeces	None	2023-06-03	08:17:00	negative	-	-	-	-	-	-	-
NA_F00725	Kimchi	Faeces	None	2023-06-03	11:10:00	negative	-	-	-	-	-	-	-
NA_F00738	Bako	Faeces	None	2023-06-05	09:23:00	negative	-	-	-	-	-	-	-
NA_F00743	Tiningua	Faeces	None	2023-06-05	08:36:00	negative	-	-	-	-	-	-	-
NA_F00740	Sonso	Faeces	None	2023-06-05	09:22:00	negative	-	-	-	-	-	-	-
NA_F00752	Manaus	Faeces	None	2023-06-06	14:55:00	negative	-	-	-	-	-	-	-
NA_F00751	Ngiro	Faeces	None	2023-06-06	10:14:00	negative	-	-	-	-	-	-	-
NA_F00747	Volo	Faeces	None	2023-06-06	16:36:00	negative	-	-	-	-	-	-	-
NA_F00757	Bonair	Faeces	None	2023-06-09	08:03:00	negative	-	-	-	-	-	-	-
NA_F00761	Milou	Faeces	None	2023-06-10	09:54:00	negative	-	-	-	-	-	-	-
NA_F00760	Pepe	Faeces	None	2023-06-10	08:53:00	negative	-	-	-	-	-	-	-
NA_F00763	Ndoki	Faeces	None	2023-06-11	07:16:00	negative	-	-	-	-	-	-	-
NA_F00776	Manaus	Faeces	None	2023-06-13	09:13:00	negative	-	-	-	-	-	-	-
NA_F00773	Cavally	Faeces	None	2023-06-13	16:33:00	negative	-	-	-	-	-	-	-
NA_F00782	Meru	Faeces	None	2023-06-14	09:44:00	negative	-	-	-	-	-	-	-
NA_F00785	Ryan	Faeces	None	2023-06-15	12:42:00	negative	-	-	-	-	-	-	-
NA_F00795	Spirit	Faeces	None	2023-06-16	13:12:00	negative	-	-	-	-	-	-	-
NA_F00794	Xavi	Faeces	None	2023-06-16	14:00:00	negative	-	-	-	-	-	-	-
NA_F00804	Bonair	Faeces	None	2023-06-18	08:47:00	negative	-	-	-	-	-	-	-
NA_F00809	Bonair	Faeces	None	2023-06-28	07:56:00	negative	-	-	-	-	-	-	-
NA_F00807	Lusaka	Faeces	None	2023-06-28	08:37:00	negative	-	-	-	-	-	-	-
NA_F00816	Manaus	Faeces	None	2023-06-29	11:00:00	negative	-	-	-	-	-	-	-
NA_F00810	Zoro	Faeces	None	2023-06-29	15:24:00	negative	-	-	-	-	-	-	-
NA_F00821	Meru	Faeces	None	2023-06-30	12:20:00	negative	-	-	-	-	-	-	-
NA_F00819	Cayo	Faeces	None	2023-06-30	09:45:00	negative	-	-	-	-	-	-	-
NA_F00824	Bonair	Faeces	None	2023-07-05	07:27:00	negative	-	-	-	-	-	-	-
NA_F00825	Voila	Faeces	None	2023-07-07	16:12:00	negative	-	-	-	-	-	-	-
NA_F00827	Voila	Faeces	None	2023-07-12	16:50:00	negative	-	-	-	-	-	-	-
NA_F00828	Voila	Faeces	None	2023-07-14	12:53:00	negative	-	-	-	-	-	-	-
NA_F00830	Bonair	Faeces	None	2023-07-21	12:19:00	negative	-	-	-	-	-	-	-
NA_F00831	Voila	Faeces	None	2023-07-24	12:49:00	negative	-	-	-	-	-	-	-
NA_F00832	Bonair	Faeces	None	2023-08-07	08:11:00	negative	-	-	-	-	-	-	-
NA_F00833	Voila	Faeces	None	2023-08-19	08:43:00	negative	-	-	-	-	-	-	-
NA_F00834	Bonair	Faeces	None	2023-08-24	08:57:00	negative	-	-	-	-	-	-	-
BB = Baby (infant) of

## Sheet: Supp. Table 3- Age and Symptoms
Supplementary Table 3 - Age and symptomatology associated with MPXV in the mangabey community
Individual	Sex	Birth year	Age in 2023 (years)	Age classification	Symptomatic/Asymptomatic	Severity symptoms	Asymptomatic and MPXV+	Mother of symptomatic infant
Ali	Male	2018	5	Juvenile	Asymptomatic	Asymptomatic	no	-
Amazon	Female	2014	9	Adult	Asymptomatic	Asymptomatic	yes	yes
Amboseli	Female	2006	17	Adult	Asymptomatic	Asymptomatic	yes	yes
Atacama	Female	2017	6	Adult	Symptomatic	Mild	-	yes
Auriane	Female	2020	3	Juvenile	Asymptomatic	Asymptomatic	yes	-
Babylon	Male	2017	6	Subadult	Asymptomatic	Asymptomatic	no	-
Bako	Male	2008	15	Adult	Symptomatic	Moderate	-	-
BB-Amazon	Female	2022	1	Infant	Symptomatic	Moderate	-	-
BB-Amboseli	Female	2022	1	Infant	Symptomatic	Severe	-	-
BB-Atacama	Female	2023	0	Infant	Symptomatic	Severe	-	-
BB-Bonair	Male	2022	1	Infant	Symptomatic	Moderate	-	-
BB-Cavally	Male	2023	0	Infant	Symptomatic	Severe	-	-
BB-Cayo	Female	2022	1	Infant	Symptomatic	Moderate	-	-
BB-Gishwati	NA	2023	0	Infant	Symptomatic	Severe	-	-
BB-Lavushi	Female	2022	1	Infant	Symptomatic	Moderate	-	-
BB-Lusaka	Male	2022	1	Infant	Symptomatic	Moderate	-	-
BB-Manaus	Male	2023	0	Infant	Symptomatic	Moderate	-	-
BB-Meru	Female	2023	0	Infant	Symptomatic	Severe	-	-
BB-Mgahinga	Female	2022	1	Infant	Symptomatic	Moderate	-	-
BB-Ramnagar	Male	2022	1	Infant	Symptomatic	Moderate	-	-
BB-Tiningua	Male	2023	0	Infant	Symptomatic	Severe	-	-
BB-Voila	Female	2023	0	Infant	Symptomatic	Moderate	-	-
Bilbo	Male	2022	1	Juvenile	Asymptomatic	Asymptomatic	no	-
Bioko	Male	2018	5	Juvenile	Asymptomatic	Asymptomatic	no	-
Bonair	Female	2015	8	Adult	Asymptomatic	Asymptomatic	yes	yes
Bza	Female	2012	11	Adult	Asymptomatic	Asymptomatic	yes	-
Cavally	Female	2015	8	Adult	Symptomatic	Mild	-	yes
Cayo	Female	2008	15	Adult	Asymptomatic	Asymptomatic	yes	yes
Couscous	Male	2021	2	Juvenile	Asymptomatic	Asymptomatic	yes	-
Cusco	Male	2018	5	Juvenile	Asymptomatic	Asymptomatic	no	-
Danane	Male	2018	5	Juvenile	Asymptomatic	Asymptomatic	no	-
Eden	Male	2016	7	Subadult	Asymptomatic	Asymptomatic	no	-
Gishwati	Female	2017	6	Adult	Symptomatic	Mild	-	yes
Hannibal	Male	2012	11	Adult	Asymptomatic	Asymptomatic	no	-
Ifrane	Male	2012	11	Adult	Asymptomatic	Asymptomatic	no	-
Jose	Male	2016	7	Subadult	Symptomatic	Mild	-	-
Kevin	Male	2017	6	Subadult	Asymptomatic	Asymptomatic	no	-
Kimchi	Male	2018	5	Juvenile	Asymptomatic	Asymptomatic	no	-
Lavushi	Female	2016	7	Adult	Asymptomatic	Asymptomatic	yes	yes
Lencois	Male	2017	6	Subadult	Asymptomatic	Asymptomatic	no	-
Leo	Male	2021	2	Juvenile	Symptomatic	Mild	-	-
Lukuru	Female	2018	5	Subadult	Asymptomatic	Asymptomatic	no	-
Luna	Female	2021	2	Juvenile	Asymptomatic	Asymptomatic	no	-
Lusaka	Female	2013	10	Adult	Symptomatic	Moderate	-	yes
MA222	Male	NA	NA	Adult	Asymptomatic	Asymptomatic	no	-
Malawi	Female	2016	7	Adult	Asymptomatic	Asymptomatic	yes	-
Manaus	Female	2014	9	Adult	Asymptomatic	Asymptomatic	no	-
Meru	Female	2015	8	Adult	Symptomatic	Mild	-	yes
Mgahinga	Female	2010	13	Adult	Asymptomatic	Asymptomatic	yes	yes
Milou	Male	2022	1	Juvenile	Asymptomatic	Asymptomatic	no	-
Mousse	Male	2022	1	Juvenile	Asymptomatic	Asymptomatic	no	-
Ndoki	Female	2007	16	Adult	Symptomatic	Mild	-	-
Ngiro	Female	2018	5	Adult	Asymptomatic	Asymptomatic	no	-
Nikini	Male	2016	7	Subadult	Asymptomatic	Asymptomatic	no	-
Nil	Male	2022	1	Juvenile	Asymptomatic	Asymptomatic	no	-
Ocean	Male	2012	11	Adult	Asymptomatic	Asymptomatic	no	-
Parcival	Male	2015	8	Subadult	Asymptomatic	Asymptomatic	no	-
Paterson	Male	2013	10	Adult	Asymptomatic	Asymptomatic	no	-
Pepe	Male	2010	13	Adult	Asymptomatic	Asymptomatic	no	-
Ramnagar	Female	2013	10	Adult	Asymptomatic	Asymptomatic	yes	yes
Ryan	Male	2021	2	Juvenile	Asymptomatic	Asymptomatic	yes	-
Saruman	Male	2021	2	Juvenile	Asymptomatic	Asymptomatic	no	-
Siamang	Male	2020	3	Juvenile	Asymptomatic	Asymptomatic	no	-
Simenti	Male	2018	5	Juvenile	Asymptomatic	Asymptomatic	no	-
Sonso	Female	2008	15	Adult	Asymptomatic	Asymptomatic	no	-
Spirit	Male	2018	5	Juvenile	Asymptomatic	Asymptomatic	no	-
Tasmani	Female	2015	8	Adult	Asymptomatic	Asymptomatic	yes	-
Tempura	Female	2022	1	Juvenile	Asymptomatic	Asymptomatic	no	-
Tiningua	Female	2010	13	Adult	Symptomatic	Moderate	-	yes
Titan	Male	2012	11	Adult	Asymptomatic	Asymptomatic	no	-
Toffee	Female	2022	1	Juvenile	Asymptomatic	Asymptomatic	no	-
Tokyo	Male	2017	6	Subadult	Asymptomatic	Asymptomatic	no	-
Voila	Female	2008	15	Adult	Asymptomatic	Asymptomatic	yes	yes
Volo	Male	2016	7	Subadult	Asymptomatic	Asymptomatic	no	-
Waho	Male	2010	13	Adult	Asymptomatic	Asymptomatic	no	-
Xavi	Male	2015	8	Subadult	Symptomatic	Mild	-	-
Yassa	Male	2018	5	Juvenile	Asymptomatic	Asymptomatic	no	-
Yser	Male	2015	8	Subadult	Asymptomatic	Asymptomatic	no	-
Zagne	Male	2018	5	Juvenile	Asymptomatic	Asymptomatic	no	-
Zoro	Male	2016	7	Subadult	Asymptomatic	Asymptomatic	no	-
*The last tab corresponds to the mothers that had infants during the study period. Yes = mother with symptomatic infant. No = mother with asymptomatic infant.
NA = Not Available
BB = Baby (infant) of

## Sheet: Supp. Table 3- ObservationsMgb 
Supplementary Table 3 - Observations of the symptomatology associated with MPXV in the mangabey community
Date	Individual	Symptomatology	Other
27. - 28.01.2023	BB-Amboseli	Multiple circular red lesions on the forehead, back of head, chest, legs. Lethargic
2023-01-29	BB-Amboseli	Multiple circular red lesions on the head, arms, shoulders, legs, feet, bottom, tail. Death at 10:00
2023-01-31	BB-Amboseli	Multiple circular red lesions on the head, arms, shoulders, legs, feet, bottom, tail.	The mother drops the baby at 13:00 and necropsy is performed at 00:30
2023-01-31	BB-Atacama	1 circular red lesion on ear, 1 circular grey lesion on right arm. End of tail is broken, necrotic
2023-01-31	BB-Gishwati	1 circular red lesion on right forehead, 1 circular red lesion on arm. Left eye closed
2023-02-01	BB-Gishwati	Multiple circular red lesions on head, arms and legs
2023-02-01	BB-Lusaka	1 circular black scar on right forehead
2023-02-01	BB-Mgahinga	1 circular red lesion on tail, 1 circular skin-coloured lesion on shoulder
2023-02-02	BB-Gishwati	Multiple circular red lesions around body. Lethargic, not holding mother properly in the evening
2023-02-02	BB-Mgahinga	2-3 circular red lesions on tail
2023-02-03	BB-Atacama	Multiple circular red lesions on head, face, arms, feet, tail. End of tail is broken, necrotic
2023-02-03	BB-Bonair	1 circular black lesion on tail
2023-02-03	BB-Gishwati	Multiple circular red lesions on head, lateral sides, arms, hands, shoulders, legs, feet
2023-02-03	BB-Lusaka	1 circular grey lesion on right forehead. Scar on tail
2023-02-03	BB-Mgahinga	3 circular red lesions on tail
2023-02-04	BB-Atacama	Multiple circular red lesions on head, face, arms, hands, feet, tail. End of tail is broken, necrotic
2023-02-04	BB-Bonair	1 circular black lesion on tail
2023-02-04	BB-Gishwati	Multiple circular red lesions on head, lateral sides, arms, hands, shoulders, legs, feet (some lesions are regenerating). Lethargic, not holding mother properly in the evening
2023-02-04	BB-Lusaka	1 circular grey lesion on right forehead. 1 scar on tail
2023-02-04	BB-Mgahinga	3 circular red lesions on tail
2023-02-05	BB-Atacama	Multiple circular red lesions on face, arms, hands, feet, tail. 1 circular scab back of head. End of tail is broken, necrotic
2023-02-05	BB-Bonair	1 circular black lesion on tail, 2-3 circular skin coloured lesions on the face
2023-02-05	BB-Gishwati	Multiple circular red lesions on head, lateral sides, arms, hands, shoulders, legs, feet (some lesions are regenerating). Lethargic, not holding mother properly in the evening
2023-02-05	BB-Lavushi	2-3 circular skin coloured lesions on head
2023-02-05	BB-Voila	2-3 skin coloured circular lesions on the forehead
2023-02-06	BB-Atacama	Multiple circular red lesions on face, arms, hands, feet (some are scabs). 1 big circular scab back of head. End of tail is broken, necrotic. Lethargic, not holding mother properly
2023-02-06	BB-Bonair	1 circular small scab and 1 papule on lower left leg, 2 papules on chin, on forehead and next to eye, 1 scab at the beggining of tail and on left armpit, 3-4 macule on left arm	The head is frequently groomed by the mother
2023-02-06	BB-Gishwati	Multiple circular red lesions on face, forehead, feet, hands, wrists, shoulders, flanks, tail (Some of them are scabs). Eyes closed, one eye is inflamated
2023-02-06	BB-Lusaka	1 circular big scab on right forehead
2023-02-06	BB-Mgahinga	Red lesion on tail, inflamation around. Open wound at the end of tail
2023-02-07	BB-Atacama	Multiple circular red lesions on face, arms, hands, feet. Some have scabs. 1 big circular scab back of head. Death at 12:30
2023-02-07	BB-Bonair	1 circular small scab and 1 papule on lower left leg, 2 papules chin, on forehead and next to eye, 1 scab beggining of tail, on left armpit, 3-4 macule on left arm
2023-02-07	BB-Gishwati	Multiple circular red lesions on face, forehead, feet, hands, wrists, shoulders, flanks, tail (some are scabs). Eyes closed, left eye is inflamated
2023-02-07	BB-Lusaka	1 circular small scab on right forehead.
2023-02-07	BB-Mgahinga	1 red lesion on tail, inflamation around.
2023-02-08	BB-Bonair	2 scabs on lower left leg, one on knee and one on thigh, 4 scabs on face-forehead and one papule on forehead, 1 scab beggining of tail, on right armpit, 2 scabs on left arm
2023-02-08	BB-Gishwati	Improvement of skin lesions, but not seen in detail. One eye closed (right), the other one is inflamated
2023-02-08	BB-Lavushi	Hair irregularities on head
2023-02-08	BB-Lusaka	1 circular small scab on right forehead. Scab on dorsal part of beggining of the tail (slightly left).
2023-02-08	BB-Mgahinga	Loss of end of the tail?
2023-02-08	BB-Ramnagar	1 white circular lesion on right elbow
2023-02-08	BB-Voila	1 scab on nose and 2 papules on forehead
2023-02-09	BB-Atacama		Mother drops the baby and necropsy is performed at 15:30
2023-02-10	BB-Bonair	2 scabs on lower left leg, one on knee and one on thigh, 4 scabs on face-forehead and one papule on forehead, 1 scab beggining of tail, on right armpit, 2 scabs on left arm. Circular lesions on head and lower back
2023-02-10	BB-Gishwati	Skin lesions barely seen. One big scab on lower back. Very lethargic, lost of left eye?
2023-02-10	BB-Lavushi	3 circular red lesions on face
2023-02-10	BB-Lusaka	2 circular red lesions on tail. Bald patch left of head.
2023-02-11	BB-Bonair	1 scab back of head, some on face. 1 circular skin colored lesion on forehead
2023-02-11	BB-Gishwati	Skin lesions barely seen. One big scab on lower back. Very lethargic, lost of left eye? Death at 16:00-17:00
2023-02-11	BB-Lusaka	Few circular skin-colored skin lesions on forehead, one bald patch on left of head
2023-02-11	BB-Mgahinga	End of tail has a wound
2023-02-11	BB-Ramnagar	1 white circular lesion on right elbow
2023-02-12	Atacama	1 small red lesion on right cheek
2023-02-13	Atacama	Red flat tiny lesion on right cheek
2023-02-13	BB-Bonair	Red tiny lesion on left arm, two scabs on right foot, one red circular lesion and one skin-coloured papule on left leg
2023-02-13	BB-Cayo	Some skin-coloured papules on forehead
2023-02-13	BB-Gishwati		Mother drops the body and necropsy is performed at 15:30
2023-02-13	BB-Lusaka	Multiple red papules on forehead, red tiny lesion next to nose and on left chin. 3 tiny red papules around right eye, 1 scab on upper left eyelid. Circular big red lesion end of tail
2023-02-13	BB-Mgahinga	Wound on tail. Skin coloured papule on right side of face.
2023-02-13	BB-Ramnagar	One scar on elbow, few macules on forehead and lateral to the face. Red tiny spot next to nose?
2023-02-13	BB-Voila	Some skin-coloured papules on forehead. Red tiny spot next to nose
2023-02-13	Leo	1 circular lesion on right arm, next to armpit
2023-02-13	Lusaka	Red big scab on right wrist
2023-02-15	BB-Lavushi	Field Assistant didn’t seen any lesions.
2023-02-16	Atacama	No visible lesions
2023-02-16	BB-Amazon	Macules on forehead and skin coloured bump further from forehead. A wart on the internal angle of the left eye. Scab on the left side of the back.
2023-02-16	BB-Bonair	Little scab on lower lip. Red lesion under the right eye. Alopecia on forehead and a little scab. Two scabs on the right side of the body, one behind the head and one on the right base of the tail
2023-02-16	BB-Cavally	A big red scab and a red papule on the right side of the body. A scab on the middle left side of the tail
2023-02-16	BB-Cayo	Scab on the right armpit
2023-02-16	BB-Lusaka	Skin lesions are worse. Red lesions in the forehead and lateral angle of the left eye. Open wounds with descamation on left part of the mouth and internal angle of the left eye. Multiple red lumps on the neck and two skin coloured lumps on the left arm. Two scabs on the tail, on the middle and on the final part
2023-02-16	BB-Manaus	Red scab on left shoulder
2023-02-16	BB-Meru	Red little papules on the forehead. Tail in bad shape, could be diarrhea.
2023-02-16	BB-Mgahinga	Healed wound on the tail. Skin coloured papules on the forehead
2023-02-16	BB-Ramnagar	Skin coloured papules on the forehead
2023-02-16	BB-Voila	A wart on the internal angle of the right eye. Skin coloured papules on the forehead. Reddish papule lump on the middle of the tail
2023-02-16	Cavally	Three little papules on the forehead.
2023-02-16	Leo	1 circular lesion on right arm, next to armpit
2023-02-16	Lusaka	Big scab on the forearm.
2023-02-17	Bako	PhD students saw three red papules on the chest
2023-02-17	Gishwati	Field assistant saw one little papule next to right eye
2023-02-18	BB-Amazon	Skin coloured papules on the head. One scab on the back
2023-02-18	BB-Cavally	Two scabs on right side of the body, one little scab on right elbow, four little more on forehead, one on the tail and one on the back, right side
2023-02-18	BB-Cayo	One papule on the upper lid of the left eye and one scab on the right armpit
2023-02-18	BB-Lusaka	Scabs and white papules all over the face. Multiple red papules on neck and ears. Skin coloured papuled behind the right knee and two more on right arm. One big papule on the tail
2023-02-18	BB-Manaus	Three papules on the tail. One scab on the shoulder
2023-02-18	Cavally	Nothing on the forehead already. Two little scabs, each on one side of the mouth
2023-02-18	Lusaka	Doesn´t have a scab anymore on the forearm, it persists a skin coloured lump
2023-02-21	Atacama	No visible lesions
2023-02-21	Bako	No visible lesions
2023-02-21	BB-Amazon	Some skin coloured and red papules on top of head and forehead, 2 skin coloured papules on left leg
2023-02-21	BB-Bonair	Fur irregularities on tail, few skin coloured papules on forehead and top of head. 1 small pink papule medially left eye, 1 bigger on right eyebrow. 1 scar laterally right eye
2023-02-21	BB-Cavally	1 red papule on left upper eyelid, 1 vesicle on right hand, 1 red papule right arm and 2 on left arm. Some big circular lesions on right lateral abdomen, 1 papule on tail
2023-02-21	BB-Lusaka	Multiple scabs and skin coloured papules all over head and face and some in arms and legs. Some scabs on the tail, back and chest. Linear scar beginning of tail
2023-02-21	BB-Manaus	3 scabs on tail, 1 on right back, 1 big red scab on left shoulder. 3-4 red papules on belly
2023-02-21	BB-Meru	1 vesicle on feet. Not seen in detail
2023-02-21	BB-Mgahinga	End of tail broken. Wound is healing
2023-02-21	BB-Ramnagar	No visible lesions
2023-02-21	BB-Tiningua	Some skin-coloured papules on forehead and eyebrows (barely visible)
2023-02-21	BB-Voila	Some skin coloured papules on forehead (barely visible)
2023-02-21	Cavally	No visible lesions
2023-02-21	Gishwati	No visible lesions
2023-02-21	Lusaka	2 tiny skin coloured papules on left forearm (barely visible)
2023-02-22	BB-Meru	Some vesicles and red papules on legs, arms, hands and feet
2023-02-22	Leo	No visible lesions
2023-02-24	BB-Amazon	Some skin coloured and red scabs on top of head and forehead, some scabs on face, ears, right hand and feet. 1 red pustule and 1 scab on tail. Some skin coloured papules on head. Red macule on right ear and on nose
2023-02-24	BB-Cavally	Multiple vesicles and pustules on face and head, arms, legs, hands and feet. One big vesicle on left bottom eyelid that makes his eye more closed. 2 big scabs on back and some in left leg. 2 big pustules on right belly. Rash beginning tail and scab medium tail
2023-02-24	BB-Cayo	No visible lesions
2023-02-24	BB-Lusaka	One pustule and multiple reddish macules on neck and chest. Skin coloured papules on forehead. Scabs on right eyebrow, next to nose (left side) and next to mouth (left side). Scab on tail. Two scabs on bottom
2023-02-24	BB-Manaus	Some skin coloured papules on face and forehead, some reddish papules on right wrist. 1 scab on tail, left shoulder, right knee and next to mouth on the right side. 2 red scabs on belly
2023-02-24	BB-Meru	Open wound under left eye and on forehead. 1 scab on the back of the head. 1 red papule on left ear. Skin coloured papule on left side of neck, under left eye and on nose. Scab on right ear. Pustules on arms, legs and on neck (right side). Skin coloured papule on right foot
2023-02-24	BB-Mgahinga	End of tail broken. Little scab.
2023-02-24	BB-Ramnagar	1 red papule/scab on left side of the body
2023-02-24	BB-Tiningua	Some skin coloured papules on forehead, rash on head and shoulders
2023-02-25	BB-Bonair	Some skin coloured papules on forehead and head. 1 scab on tail and 1 on belly
2023-02-25	BB-Cavally	Multiple vesicles and pustules on face and head, arms, legs, hands and feet. One big vesicle on left bottom eyelid that makes his eye more closed. 2 big scabs on back and some in left leg. 2 big pustules on right belly. Multiple red papules and scabs on tail	Sleeping/suckling for most part of the day. Not seen playing or getting off the mother. Crying when mother runs.
2023-02-25	BB-Voila	Fur irregularities on forehead (barely visible). Red small papule on left cheek
2023-02-25	Lusaka	No visible lesions
2023-02-26	BB-Cavally	Same lesions. Sleeping/suckling for most part of the day. Didn’t cry much.
2023-02-27	BB-Amazon	Some scars on top of head. 1 small red papule medial left eye. 2 scabs on tail
2023-02-27	BB-Cavally	Multiple pustules and red-black scabs on face and head, ears, arms, legs, tail, hands and feet. One big pustule on left bottom eyelid that makes his eye more closed. 1 big scab on back and 1 big scab on right belly. Sleeping/suckling for most part of the day. Not seen playing or getting off the mother. No crying heard
2023-02-27	BB-Mgahinga	End of tail already healed. No visible lesions
2023-02-27	BB-Voila	Fur irregularities on forehead (barely visible). Red small flat lesion on left cheek
2023-02-28	BB-Bonair	Some fur irregularities on head (scars?) barely visible. 1 scab on tail, 1 on left knee
2023-02-28	BB-Cavally	Multiple pustules and red-black scabs on face and head, ears, arms, legs, tail, hands and feet. One big pustule on left bottom eyelid that makes his eye more closed. 1 big scab on back and 1 big scab on right belly. Sleeping/suckling for most part of the day. Not seen playing or getting off the mother. Crying when the mother moved
2023-02-28	BB-Lusaka	Some skin coloured papules on forehead. 1 scab on bottom. Few scars on tail and arms. Big scar on left part of head
2023-02-28	BB-Manaus	1 scab on tail, 1 on back. 2 skin colour papules on tail
2023-02-28	BB-Meru	Multiple pustules and red-black scabs on face, chin, ears, forehead, head, shoulders, arms, legs, hands, feet and tail. 1 big scabs on back and top of head and 2 on right wrist
2023-02-28	BB-Ramnagar	No visible lesions
2023-02-28	BB-Tiningua	Few skin coloured papules on forehead barely visible
2023-03-01	BB-Cavally	Death at 10:30
2023-03-03	BB-Amazon	Black scab on tip of tail, red scab on middle tail. 1 red scab on medial left eye
2023-03-03	BB-Bonair	3 brown macules on tail. 1 skin coloured papule next to mouth (left) and wounds under left eye and under left nostril
2023-03-03	BB-Lusaka	1 red scab on tail. Scars on tail and arms
2023-03-03	BB-Ramnagar	Two skin coloured papules between eyebrows
2023-03-03	BB-Tiningua	Two skin coloured papules on left side of face, 2 skin coloured papules on forehead. 5 red papules on right shoulder. 3 skin coloured papules on left arm
2023-03-03	BB-Voila	No visible lesions
2023-03-05	BB-Manaus	1 little scab on right back, shoulder and right wrist. Very little red papule on right hand, 2 little skin coloured papules on tail. 1 scab on very end of tail
2023-03-05	BB-Meru	Multiple big pustules and red-black scabs on face, chin, ears, forehead, head, shoulders, arms, legs, hands, feet, belly and tail. Cries more, especially when mother runs
2023-03-05	BB-Tiningua	Multiple red papaules and few scabs on face, ears and forehead, multiple red papules and macules on back of head, back, hips, penis and tail. Multiple red papules and vesicles on arms, hands, legs and feet.
2023-03-08	BB-Amazon	1 red wound medial right eye, 1 skin coloured papule between eyes. 2 scabs on tail
2023-03-08	BB-Bonair	1 scab on tail and 2 brown flat spots
2023-03-08	BB-Lusaka	1 brown scab on inner right leg. Some red papules on forehead and lateral to right eye. 1 smalll wound on nose. Scars on tail, arms and head
2023-03-08	BB-Manaus	1 scab on very end of tail. Few macules and papules on forehead
2023-03-08	BB-Meru	Multiple pustules and red scabs on face, chin, ears, forehead, back of head, shoulders, arms, legs, hands, feet, sides of body and tail. More active than before. Some coughing has been heard throughout the day
2023-03-08	BB-Mgahinga	1 very little pustule on top of head (barely visible)
2023-03-08	BB-Ramnagar	Few skin coloured papules between eyebrows
2023-03-08	BB-Tiningua	Multiple red papules, vesicles, pustules and few scabs on face, ears, forehead, back of head, back, belly, hips, tail, penis. Some vesicles on eyelids
09. - 10. - 11.03.2023	Lusaka	1 red macule on abdomen
2023-03-12	Bako	Field assistant has seen a red papule on tail
2023-03-12	BB-Amazon	Skin coloured papule on medial corner of left eye. Scab near tip of the tail. Skin coloured papules on forehead?
2023-03-12	BB-Bonair	Two little scabs on face (forehead and next to lateral corner of right eye). Little wound on lateral corner of left eye. Three flat brown macules on tail (scabs?) and a wound next to the middle of the tail.
2023-03-12	BB-Lavushi	Few red macules and papules around eyes. Fur irregularities on head
2023-03-12	BB-Lusaka	Skin coloured papules on forehead. Little scab on left side of the mouth. At least five scabs on the tail. 1 scab on right side of the body. 1 scab on left ankle. 1 scab (or flat brown macule?) on inner right thigh
2023-03-12	BB-Manaus	2 scabs on forehead. 1 scab on tip of the tail and three skin coloured big papules on the tail
2023-03-12	BB-Meru	Multiple scars and few scabs all over the body. Very active and doesn’t cough anymore
2023-03-12	BB-Mgahinga	1 small scab next to mouth, left side. Skin coloured papules-pustules? on medial corner of left eye
2023-03-12	BB-Ramnagar	Few skin coloured papules on forehead. 1 scab on left side of the back
2023-03-12	BB-Tiningua	Multiple red and brown scabs and some wounds on face, ears, forehead, back of head, belly, hips and beginning of tail. 1 big scab on lower back
2023-03-12	José	2 little red macules and 1 little pustule around right eye
2023-03-12	Lusaka	No visible lesions
2023-03-12	Tiningua	Multiple red macules on the upper inner thight, 2 brown papules on inner left leg, 1 scab on cranial side of right leg
2023-03-14	Bako	1 red macule on left upper eyelid, 1 little scab on right upper eyelid. Some little macules and scabs on the groin
2023-03-14	BB-Amazon	1 little skin coloured papule on medial corner of left eye. 1 little scab near tip of the tail
2023-03-14	BB-Bonair	Three little scabs on face (forehead, next to lateral corner of right eye and next to lateral corner of left eye). Three flat brown macules on tail and a scab on the middle of the tail
2023-03-14	BB-Lusaka	Skin coloured papules on forehead. Five scabs on the tail. 1 scab on left ankle and 1 on inner right thigh
2023-03-14	BB-Manaus	2 scabs on forehead. 1 scab on tip of the tail and three skin coloured papules on the tail
2023-03-14	BB-Meru	Multiple scars and few scabs all over the body. 1 pustule (?) on left ankle. 1 little scab on right upper eyelid
2023-03-14	BB-Mgahinga	Skin coloured papules-pustules on medial corner of left eye
2023-03-14	BB-Ramnagar	Few skin coloured papules on forehead. Little scabs on upper and lower lips. 1 scab on left side of the back ad 1 on right posterior side of the body. 1 scab on inner right thigh
2023-03-14	BB-Tiningua	Multiple red and brown scabs and wounds on face, ears, forehead, back of head, belly, hips, legs, arms and tail. 1 big scab on the back
2023-03-14	BB-Voila	1 red macule on forehead (left side). Pustules-scabs on left shoulder. 1 little scab on left arm. 1 big scab on left side of the body?
2023-03-14	José	Assistant has seen some lesions on mandibule
2023-03-14	Lusaka	Some red macules on groin
2023-03-14	Meru	Some red macules on groin
2023-03-14	Tiningua	Some papules, pustules and scabs on inner thighs, arms, chin, chest and a small scab on right shoulder. 1 red papule on left upper eyelid
2023-03-14	Xavi	1 scab on the tail. Assistant has seen some macules on groin
2023-03-15	BB-Lavushi	No visible lesions
2023-03-15	José	1 tiny red scab below right eye
16. - 17. - 18.03.2023	Bako	1 red scab on beggining of the tail (ventral side). Face and groin not seen in detail
16. - 17. - 18.03.2023	BB-Bonair	1 wound and 1 scab on tail
16. - 17. - 18.03.2023	BB-Lusaka	Few scabs on tail and legs. Red macules on face, chin and neck
16. - 17. - 18.03.2023	BB-Manaus	1 scab on forehead. Few scab on tail
16. - 17. - 18.03.2023	BB-Meru	Multiple scars and few scabs all over the body
16. - 17. - 18.03.2023	BB-Tiningua	Multiple red and brown scabs and wounds on face, ears, forehead, back of head, belly, hips, legs, arms and tail. 1 big scab on back. Big allopecic reddish nodule on left side of neck (enlarged Ln?)
16. - 17. - 18.03.2023	Lusaka	Some red macules on groin, 1 brown scab on finger, 2 little scabs on face
16. - 17. - 18.03.2023	Meru	Very few scabs on groin
16. - 17. - 18.03.2023	Tiningua	Some scabs and few papules and pustules on inner thighs, arms, chin and chest
19. - 20.03.2023	Bako	Few red little spots on inner right thigh
19. - 20.03.2023	BB-Amazon	1 little wound on the nose
19. - 20.03.2023	BB-Bonair	2 crusts on tail
19. - 20.03.2023	BB-Lusaka	Pink scars on the tail
19. - 20.03.2023	BB-Manaus	Not seen in detail
19. - 20.03.2023	BB-Meru	No visible lesions apart from the scars
19. - 20.03.2023	BB-Mgahinga	Red wound on inner corner of right eye (looks like a scratch)
19. - 20.03.2023	BB-Ramnagar	No visible lesions
19. - 20.03.2023	BB-Tiningua	Multiple scars and few scabs all over the body. Wound of about 4 cm where the nodule was before on the neck
19. - 20.03.2023	BB-Voila	Big crust on left side of the body. Not seen in detail
19. - 20.03.2023	José	Skin coloured papule under right eye, no scab. One little red spot on right inner thigh
19. - 20.03.2023	Lusaka	Little red spots on inner thighs
19. - 20.03.2023	Tiningua	Some scabs on inner thighs, left chin and left ankle
19. - 20.03.2023	Xavi	No visible lesions
25. - 26.03.2023	BB-Bonair	Two big scabs on tail
25. - 26.03.2023	BB-Lusaka	Skin coloured papule with a little scab on the base of the tail, left side
25. - 26.03.2023	BB-Manaus	No visible lesions
25. - 26.03.2023	BB-Tiningua	Scars all over the body and a few scabs
25. - 26.03.2023	BB-Voila	Two big lumps on left side of the body
25. - 26.03.2023	Meru	No visible lesions
25. - 26.03.2023	Simenti	Scratch? next to left eye
25. - 26.03.2023	Tiningua	Some red macules on lower posterior extremities. Scabs on inner thighs
2023-03-22	Bako	No visible lesions
2023-03-22	BB-Amazon	No visible lesions
2023-03-22	BB-Bonair	2 crusts on tail
2023-03-22	BB-Lusaka	1 skin coloured papule on he tail next to the base, left side. 1 reddish papule on internal corner of left eye. He could not open the eyes on the first hours of the morning and was scratching them all the time; he could open them later, but had some mild inflammation
2023-03-22	BB-Manaus	Assistant informs about two scabs on the gluteus
2023-03-22	BB-Mgahinga	No visible lesions
2023-03-22	BB-Tiningua	Multiple scars and few scabs all over the body. Scab where the nodule was before on the neck. Big lump with crust on left knee
2023-03-22	BB-Voila	2 big lumps with crust on left part of the back, next to the shoulder. 1 little scab on right part of the back, next to the shoulder
2023-03-22	José	No visible lesions
2023-03-22	Lusaka	No visible lesions
2023-03-22	Tiningua	Some scabs on inner thighs, left forearm and left ankle
29. - 30.03.2023	BB-Amazon	1 little scab on tail
29. - 30.03.2023	BB-Bonair	Two big scabs on tail
29. - 30.03.2023	BB-Lusaka	Skin coloured papule on the base of the tail, left side. Scratch, probably, on external corner of right eye
29. - 30.03.2023	BB-Manaus	Vesicle on exterior right thigh?
29. - 30.03.2023	BB-Meru	Wound between the toes of the right foot
29. - 30.03.2023	BB-Mgahinga	1 scab on chest. 1 skin coloured wart on exterior corner of left eye
29. - 30.03.2023	BB-Tiningua	Scars all over the body and a few scabs
29. - 30.03.2023	BB-Voila	Two big lumps on left side of the body. Protruding on a cawliflower-like shape. One lump on the tail, overed by fur?
29. - 30.03.2023	Tiningua	Scabs on inner thighs
31.03. - 01.04.2023	BB-Amazon	1 little scab on tail
31.03. - 01.04.2023	BB-Bonair	Two big scabs and a little one on tail
31.03. - 01.04.2023	BB-Lusaka	Skin coloured papule on the base of the tail, left side. One lesion on lip. One wound between the eyebrows
31.03. - 01.04.2023	BB-Meru	Not seen in detail
31.03. - 01.04.2023	BB-Mgahinga	1 scab on chest. 1 skin coloured wart on exterior corner of left eye
31.03. - 01.04.2023	BB-Tiningua	No visible lesions apart from scars
31.03. - 01.04.2023	BB-Voila	Two big lumps on left side of the body. Protruding on a cawliflower-like shape. One lump on the tail, covered by fur
31.03. - 01.04.2023	Tiningua	Scabs on inner thighs
31.03. - 01.04.2023	BB-Amazon	No visible lesions apart from scars on tail
31.03. - 01.04.2023	BB-Bonair	Two big black scabs on tail
31.03. - 01.04.2023	BB-Manaus	No visible lesions
31.03. - 01.04.2023	BB-Meru	1 flat brown spot on nose and some scars around body. 1 skin coloured wart between tous on right foot
31.03. - 01.04.2023	BB-Mgahinga	1 tiny scab on chest, 1 skin coloured wart on exterior corner of left eye
31.03. - 01.04.2023	BB-Tiningua	Scars all over the body and a few scabs
31.03. - 01.04.2023	BB-Voila	Two big allopecic pinkish lumps on left side of body. Protruding on a cawliflower-like shape
31.03. - 01.04.2023	Tiningua	Some tiny scabs on inner thighs
09. - 10.04.2023	BB-Bonair	Two big black scabs on tail
09. - 10.04.2023	BB-Lusaka	No visible lesions apart from scars on tail
09. - 10.04.2023	BB-Meru	No visible lesions apart from scars all over the body
09. - 10.04.2023	BB-Mgahinga	2 tiny red papules next to left eye and 1 scab on chest. 1 wound on chin, 1 behind the ear and 1 on elbow (left side of body)
09. - 10.04.2023	BB-Tiningua	Scars all over the body and a few scabs. Skin-coloured papules all over the body (remaining of old lesions?)
09. - 10.04.2023	BB-Voila	Two big allopecic pinkish lumps on left side of body, protruding on a cawliflower-like shape. 1 skin-coloured lump on base of tail
09. - 10.04.2023	Tiningua	Some tiny scabs on inner thighs
11. - 12. - 13.04.2023	BB-Bonair	2 big black scabs on tail, 1 wound and 1 stain on tail. At the end of the day 2 scabs were removed and visible lesions
11. - 12. - 13.04.2023	BB-Lusaka	Skin coloured-pinkish lump on tail
11. - 12. - 13.04.2023	BB-Manaus	1 skin coloured lump and 2 little scabs on tail
11. - 12. - 13.04.2023	BB-Mgahinga	2 scabs on forehead, 1 on tail, 1 on elbow. 1 wound behind ear (smaller and blackish)
11. - 12. - 13.04.2023	BB-Tiningua	Pinkish and skin coloured papules and some scabs on head, face, chest, hips, legs and arms
11. - 12. - 13.04.2023	BB-Voila	2 big allopecic pinkish lumps on left side of body (cranial one barely visible anymore), protruding on a cawliflower-like shape. 1 skin-coloured lump on base of tail
11. - 12. - 13.04.2023	Ndoki	1 red scab on right neck
11. - 12. - 13.04.2023	Tiningua	Some tiny scabs, red papules and macules on inner thighs
14. - 15. - 16.04.2023	BB-Bonair	1 big wound-scab (previous two big scabs combined) and two little scabs
14. - 15. - 16.04.2023	BB-Lusaka	Two skin-coloured/pinkish lumps on tail
14. - 15. - 16.04.2023	BB-Manaus	1 skin coloured lump and 2 scabs on tail
14. - 15. - 16.04.2023	BB-Mgahinga	1 scab on tail, 1 on elbow
14. - 15. - 16.04.2023	BB-Tiningua	Few pink-red papules on legs and arms
14. - 15. - 16.04.2023	BB-Voila	1 allopecic pinkish lumps on left side of body, protruding on a cawliflower-like shape. 1 lump on base of tail, covered by fur
14. - 15. - 16.04.2023	Tiningua	Few tiny scabs on inner thighs
17. - 18. - 19.04.2023	BB-Bonair	1 big wound-scab and two little scabs
17. - 18. - 19.04.2023	BB-Lusaka	Little lump on middle of tail
17. - 18. - 19.04.2023	BB-Manaus	Two scabs on tail, one red and the other one dark, crust-like
17. - 18. - 19.04.2023	BB-Mgahinga	No visible lesions
17. - 18. - 19.04.2023	BB-Tiningua	Few macules around the body
17. - 18. - 19.04.2023	BB-Voila	1 allopecic pinkish lumps on left side of body, covered by fur. 1 scab on base of tail, where the lump was before
17. - 18. - 19.04.2023	Ndoki	Scab under the chin, right side
17. - 18. - 19.04.2023	Tiningua	Few scabs on inner thighs
20. - 21.04.2023	BB-Bonair	1 big wound-scab and two little scabs
20. - 21.04.2023	BB-Lusaka	Little lump on middle of tail
20. - 21.04.2023	BB-Manaus	Two little crusts on tail
20. - 21.04.2023	BB-Tiningua	Few macules around the body
20. - 21.04.2023	BB-Voila	1 lesion completely covered by fur. 1 scab on base of tail, where the lump was before
20. - 21.04.2023	Ndoki	Scab under the chin, right side
20. - 21.04.2023	Tiningua	Few scabs on inner thighs
22. - 23. - 24.04.2023	BB-Bonair	1 big wound-scab and two little scabs
22. - 23. - 24.04.2023	BB-Lusaka	Two little lumps on middle of the tail, one dorsal and one ventral
22. - 23. - 24.04.2023	BB-Manaus	Two little alopecic areas where there were two crusts before
22. - 23. - 24.04.2023	BB-Tiningua	No visible lesions
22. - 23. - 24.04.2023	BB-Voila	1 lesion completely covered by fur. 1 alopecic spot on base of tail
22. - 23. - 24.04.2023	Ndoki	Scab under the chin, right side
22. - 23. - 24.04.2023	Tiningua	No visible lesions
25. - 26.04.2023	BB-Voila	1 lesion completely covered by fur. 1 alopecic spot on base of tail
The lesions observed after this date are considered secondary complications
2023-06-01	BB-Bonair	Two big alopecic spots on the tail with smaller crusts on them. One of the crusts looks bloody
2023-06-01	BB-Cayo?	1 scab on the tail, 8 cm from the base, left side
2023-06-01	BB-Manaus	Two scabs on the forearm (one of them bigger than the other). She licks them and the forearm looks swollen. One scab over left eye
2023-06-01	BB-Voila	Two lumps on left side of the body and one on the right side. Dark crust on base of the tail
2023-06-05	BB-Bonair	Two big alopecic spots on the tail with smaller crusts on them. One of the crusts looks bloody
2023-06-05	BB-Manaus	Two scabs on outer left forearm and one on inner left elbow
2023-06-05	BB-Meru	Little alopecic spot on the tail
2023-06-05	BB-Voila	Two lumps on left sie of the body and one on the right side. Dark crust on base of the tail
2023-07-01	BB-Bonair	Two big alopecic spots with little crusts on them and one big crust on tail
2023-07-01	BB-Tiningua	On the 16/06 BB TIN was agressed by a mangabey male: he had 1 wound in the left mandible, dislocated mandible, 1 wound on the left shoulder and another one on the left arm (see photos). On the 01/07, BB TIN still had the mandible dislocated and swollen but the wounds on the mandible and shoulder were healing well (just a scar was seen on the arm)
2023-07-01	BB-Voila	Dark big crust on base of the tail
2023-07-08	BB-Bonair	One big alopecic spots on the tail with a smaller crust on it
2023-07-08	BB-Tiningua	Dark scab under mandible
2023-07-08	BB-Voila	Dark big crust on base of the tail
2023-07-25	BB-Bonair	2 alopecic pinkish spots on the tail
2023-07-25	BB-Voila	1 big oval wound with little crusts on the base of the tail
2023-08-06	BB-Voila	1 alopecic area on base of tail, pinkish
BB = Baby (infant) of

## Sheet: Supp. Table 4- Rodents TNP-Tai 
Supplementary Table 4 - Molecular Detection of OPV DNA in different tissues of rodents
Extract ID	Individual	Sample type	Storage medium	Collection date	OPV PCR	OPV Copies/5µL
BD_0507	BD-C-0001 R	Oral swab	NAP buffer	2021-07-20	negative	-
BD_0689	BD-C-0001 R	Liver	NAP buffer	2021-07-20	negative	-
BD_0760	BD-C-0001 R	Spleen	NAP buffer	2021-07-20	negative	-
BD_1100	BD-C-0001 R	Rectal swab	NAP buffer	2021-07-20	negative	-
BD_0892	BD-C-0001 R	Lung	NAP buffer	2021-07-20	negative	-
BD_0504	BD-C-0002 R	Oral swab	NAP buffer	2021-07-20	negative	-
BD_0695	BD-C-0002 R	Liver	NAP buffer	2021-07-20	negative	-
BD_0763	BD-C-0002 R	Spleen	NAP buffer	2021-07-20	negative	-
BD_1101	BD-C-0002 R	Rectal swab	NAP buffer	2021-07-20	negative	-
BD_0816	BD-C-0002 R	Lung	NAP buffer	2021-07-20	negative	-
BD_0622	BD-C-0003 R	Oral swab	NAP buffer	2021-07-21	negative	-
BD_0683	BD-C-0003 R	Liver	NAP buffer	2021-07-21	negative	-
BD_0764	BD-C-0003 R	Spleen	NAP buffer	2021-07-21	negative	-
BD_1102	BD-C-0003 R	Rectal swab	NAP buffer	2021-07-21	negative	-
BD_0893	BD-C-0003 R	Lung	NAP buffer	2021-07-21	negative	-
BD_0610	BD-C-0004 R	Oral swab	NAP buffer	2021-07-21	negative	-
BD_0698	BD-C-0004 R	Liver	NAP buffer	2021-07-21	negative	-
BD_0748	BD-C-0004 R	Spleen	NAP buffer	2021-07-21	negative	-
BD_0610	BD-C-0004 R	Oral swab	NAP buffer	2021-07-21	negative	-
BD_1103	BD-C-0004 R	Rectal swab	NAP buffer	2021-07-21	negative	-
BD_0820	BD-C-0004 R	Lung	NAP buffer	2021-07-21	negative	-
BD_0581	BD-C-0005 R	Oral swab	NAP buffer	2021-07-21	negative	-
BD_0694	BD-C-0005 R	Liver	NAP buffer	2021-07-21	negative	-
BD_0755	BD-C-0005 R	Spleen	NAP buffer	2021-07-21	negative	-
BD_1104	BD-C-0005 R	Rectal swab	NAP buffer	2021-07-21	negative	-
BD_0894	BD-C-0005 R	Lung	NAP buffer	2021-07-21	negative	-
BD_0623	BD-C-0006 R	Oral swab	NAP buffer	2021-07-21	negative	-
BD_0697	BD-C-0006 R	Liver	NAP buffer	2021-07-21	negative	-
BD_0761	BD-C-0006 R	Spleen	NAP buffer	2021-07-21	negative	-
BD_1105	BD-C-0006 R	Rectal swab	NAP buffer	2021-07-21	negative	-
BD_0895	BD-C-0006 R	Lung	NAP buffer	2021-07-21	negative	-
BD_0604	BD-C-0007 R	Oral swab	NAP buffer	2021-07-21	negative	-
BD_0690	BD-C-0007 R	Liver	NAP buffer	2021-07-21	negative	-
BD_0741	BD-C-0007 R	Spleen	NAP buffer	2021-07-21	negative	-
BD_1106	BD-C-0007 R	Rectal swab	NAP buffer	2021-07-21	negative	-
BD_0827	BD-C-0007 R	Lung	NAP buffer	2021-07-21	negative	-
BD_0583	BD-C-0008 R	Oral swab	NAP buffer	2021-07-21	negative	-
BD_0676	BD-C-0008 R	Liver	NAP buffer	2021-07-21	negative	-
BD_0756	BD-C-0008 R	Spleen	NAP buffer	2021-07-21	negative	-
BD_1107	BD-C-0008 R	Rectal swab	NAP buffer	2021-07-21	negative	-
BD_0896	BD-C-0008 R	Lung	NAP buffer	2021-07-21	negative	-
BD_0594	BD-C-0009 R	Oral swab	NAP buffer	2021-07-22	negative	-
BD_0679	BD-C-0009 R	Liver	NAP buffer	2021-07-22	negative	-
BD_0750	BD-C-0009 R	Spleen	NAP buffer	2021-07-22	negative	-
BD_1108	BD-C-0009 R	Rectal swab	NAP buffer	2021-07-22	negative	-
BD_0897	BD-C-0009 R	Lung	NAP buffer	2021-07-22	negative	-
BD_0589	BD-C-0013 R	Oral swab	NAP buffer	2021-07-22	negative	-
BD_1112	BD-C-0013 R	Rectal swab	NAP buffer	2021-07-22	negative	-
BD_0584	BD-C-0014 R	Oral swab	NAP buffer	2021-07-22	negative	-
BD_1113	BD-C-0014 R	Rectal swab	NAP buffer	2021-07-22	negative	-
BD_0619	BD-C-0010 R	Oral swab	NAP buffer	2021-07-23	negative	-
BD_0691	BD-C-0010 R	Liver	NAP buffer	2021-07-23	negative	-
BD_0751	BD-C-0010 R	Spleen	NAP buffer	2021-07-23	negative	-
BD_1109	BD-C-0010 R	Rectal swab	NAP buffer	2021-07-23	negative	-
BD_0898	BD-C-0010 R	Lung	NAP buffer	2021-07-23	negative	-
BD_0585	BD-C-0011 R	Oral swab	NAP buffer	2021-07-23	negative	-
BD_0678	BD-C-0011 R	Liver	NAP buffer	2021-07-23	negative	-
BD_0752	BD-C-0011 R	Spleen	NAP buffer	2021-07-23	negative	-
BD_1110	BD-C-0011 R	Rectal swab	NAP buffer	2021-07-23	negative	-
BD_0819	BD-C-0011 R	Lung	NAP buffer	2021-07-23	negative	-
BD_0598	BD-C-0012 R	Oral swab	NAP buffer	2021-07-24	negative	-
BD_0675	BD-C-0012 R	Liver	NAP buffer	2021-07-24	negative	-
BD_0754	BD-C-0012 R	Spleen	NAP buffer	2021-07-24	negative	-
BD_0828	BD-C-0012 R	Lung	NAP buffer	2021-07-24	negative	-
BD_0498	BD-C-0015 R	Oral swab	NAP buffer	2021-07-25	negative	-
BD_0692	BD-C-0015 R	Liver	NAP buffer	2021-07-25	negative	-
BD_0740	BD-C-0015 R	Spleen	NAP buffer	2021-07-25	negative	-
BD_1114	BD-C-0015 R	Rectal swab	NAP buffer	2021-07-25	negative	-
BD_0807	BD-C-0015 R	Lung	NAP buffer	2021-07-25	negative	-
BD_0484	BD-C-0016 R	Oral swab	NAP buffer	2021-07-26	negative	-
BD_0674	BD-C-0016 R	Liver	NAP buffer	2021-07-26	negative	-
BD_0747	BD-C-0016 R	Spleen	NAP buffer	2021-07-26	negative	-
BD_1115	BD-C-0016 R	Rectal swab	NAP buffer	2021-07-26	negative	-
BD_0810	BD-C-0016 R	Lung	NAP buffer	2021-07-26	negative	-
BD_0593	BD-C-0017 R	Oral swab	NAP buffer	2021-07-26	negative	-
BD_1116	BD-C-0017 R	Rectal swab	NAP buffer	2021-07-26	negative	-
BD_0579	BD-C-0018 R	Oral swab	NAP buffer	2021-07-26	negative	-
BD_0688	BD-C-0018 R	Liver	NAP buffer	2021-07-26	negative	-
BD_1117	BD-C-0018 R	Rectal swab	NAP buffer	2021-07-26	negative	-
BD_0899	BD-C-0018 R	Lung	NAP buffer	2021-07-26	negative	-
BD_0578	BD-C-0019 R	Oral swab	NAP buffer	2021-07-27	negative	-
BD_0686	BD-C-0019 R	Liver	NAP buffer	2021-07-27	negative	-
BD_0759	BD-C-0019 R	Spleen	NAP buffer	2021-07-27	negative	-
BD_1118	BD-C-0019 R	Rectal swab	NAP buffer	2021-07-27	negative	-
BD_0900	BD-C-0019 R	Lung	NAP buffer	2021-07-27	negative	-
BD_0597	BD-C-0020 R	Oral swab	NAP buffer	2021-07-27	negative	-
BD_0696	BD-C-0020 R	Liver	NAP buffer	2021-07-27	negative	-
BD_0758	BD-C-0020 R	Spleen	NAP buffer	2021-07-27	negative	-
BD_1119	BD-C-0020 R	Rectal swab	NAP buffer	2021-07-27	negative	-
BD_0901	BD-C-0020 R	Lung	NAP buffer	2021-07-27	negative	-
BD_0601	BD-C-0023 R	Oral swab	NAP buffer	2021-07-28	negative	-
BD_1122	BD-C-0023 R	Rectal swab	NAP buffer	2021-07-28	negative	-
BD_0602	BD-C-0024 R	Oral swab	NAP buffer	2021-07-28	negative	-
BD_0486	BD-C-0021 R	Oral swab	NAP buffer	2021-07-28	negative	-
BD_1120	BD-C-0021 R	Rectal swab	NAP buffer	2021-07-28	negative	-
BD_0618	BD-C-0022 R	Oral swab	NAP buffer	2021-07-28	negative	-
BD_1121	BD-C-0022 R	Rectal swab	NAP buffer	2021-07-28	negative	-
BD_1123	BD-C-0024 R	Rectal swab	NAP buffer	2021-07-28	negative	-
BD_0500	BD-C-0025 R	Oral swab	NAP buffer	2021-07-29	negative	-
BD_1124	BD-C-0025 R	Rectal swab	NAP buffer	2021-07-29	negative	-
BD_0624	BD-C-0026 R	Oral swab	NAP buffer	2021-07-29	negative	-
BD_0624	BD-C-0026 R	Oral swab	NAP buffer	2021-07-29	negative	-
BD_1125	BD-C-0026 R	Rectal swab	NAP buffer	2021-07-29	negative	-
BD_0596	BD-C-0027 R	Oral swab	NAP buffer	2021-07-29	negative	-
BD_1126	BD-C-0027 R	Rectal swab	NAP buffer	2021-07-29	negative	-
BD_0506	BD-C-0028 R	Oral swab	NAP buffer	2021-07-29	negative	-
BD_0608	BD-C-0029 R	Oral swab	NAP buffer	2021-07-29	negative	-
BD_0693	BD-C-0029 R	Liver	NAP buffer	2021-07-29	negative	-
BD_0749	BD-C-0029 R	Spleen	NAP buffer	2021-07-29	negative	-
BD_1128	BD-C-0029 R	Rectal swab	NAP buffer	2021-07-29	negative	-
BD_0902	BD-C-0029 R	Lung	NAP buffer	2021-07-29	negative	-
BD_0317	BD-B-0001 R	Rectal swab	NAP buffer	2021-07-30	negative	-
BD_0650	BD-B-0001 R	Liver	NAP buffer	2021-07-30	negative	-
BD_0726	BD-B-0001 R	Spleen	NAP buffer	2021-07-30	negative	-
BD_0875	BD-B-0001 R	Lung	NAP buffer	2021-07-30	negative	-
BD_0323	BD-B-0002 R	Oral swab	NAP buffer	2021-07-30	negative	-
BD_0653	BD-B-0002 R	Liver	NAP buffer	2021-07-30	negative	-
BD_0723	BD-B-0002 R	Spleen	NAP buffer	2021-07-30	negative	-
BD_0612	BD-C-0030 R	Oral swab	NAP buffer	2021-07-30	negative	-
BD_1129	BD-C-0030 R	Rectal swab	NAP buffer	2021-07-30	negative	-
BD_1130	BD-C-0031 R	Rectal swab	NAP buffer	2021-07-30	negative	-
BD_0831	BD-B-0002 R	Lung	NAP buffer	2021-07-30	negative	-
BD_0324	BD-B-0003 R	Oral swab	NAP buffer	2021-07-31	negative	-
BD_0647	BD-B-0003 R	Liver	NAP buffer	2021-07-31	negative	-
BD_0727	BD-B-0003 R	Spleen	NAP buffer	2021-07-31	negative	-
BD_1023	BD-B-0003 R	Rectal swab	NAP buffer	2021-07-31	negative	-
BD_0823	BD-B-0003 R	Lung	NAP buffer	2021-07-31	negative	-
BD_0322	BD-B-0004 R	Oral swab	NAP buffer	2021-07-31	negative	-
BD_0654	BD-B-0004 R	Liver	NAP buffer	2021-07-31	negative	-
BD_0728	BD-B-0004 R	Spleen	NAP buffer	2021-07-31	negative	-
BD_1024	BD-B-0004 R	Rectal swab	NAP buffer	2021-07-31	negative	-
BD_0804	BD-B-0004 R	Lung	NAP buffer	2021-07-31	negative	-
BD_0312	BD-B-0005 R	Oral swab	NAP buffer	2021-07-31	negative	-
BD_0643	BD-B-0005 R	Liver	NAP buffer	2021-07-31	negative	-
BD_0724	BD-B-0005 R	Spleen	NAP buffer	2021-07-31	negative	-
BD_1025	BD-B-0005 R	Rectal swab	NAP buffer	2021-07-31	negative	-
BD_0876	BD-B-0005 R	Lung	NAP buffer	2021-07-31	negative	-
BD_0607	BD-C-0032 R	Oral swab	NAP buffer	2021-07-31	negative	-
BD_1131	BD-C-0032 R	Rectal swab	NAP buffer	2021-07-31	negative	-
BD_0582	BD-C-0033 R	Oral swab	NAP buffer	2021-07-31	negative	-
BD_0672	BD-C-0033 R	Liver	NAP buffer	2021-07-31	negative	-
BD_0746	BD-C-0033 R	Spleen	NAP buffer	2021-07-31	negative	-
BD_1132	BD-C-0033 R	Rectal swab	NAP buffer	2021-07-31	negative	-
BD_0903	BD-C-0033 R	Lung	NAP buffer	2021-07-31	negative	-
BD_0587	BD-C-0034 R	Oral swab	NAP buffer	2021-07-31	negative	-
BD_1133	BD-C-0034 R	Rectal swab	NAP buffer	2021-07-31	negative	-
BD_0591	BD-C-0035 R	Oral swab	NAP buffer	2021-07-31	negative	-
BD_1134	BD-C-0035 R	Rectal swab	NAP buffer	2021-07-31	negative	-
BD_0320	BD-B-0006 R	Oral swab	NAP buffer	2021-08-01	negative	-
BD_0655	BD-B-0006 R	Liver	NAP buffer	2021-08-01	negative	-
BD_0721	BD-B-0006 R	Spleen	NAP buffer	2021-08-01	negative	-
BD_1026	BD-B-0006 R	Rectal swab	NAP buffer	2021-08-01	negative	-
BD_0829	BD-B-0006 R	Lung	NAP buffer	2021-08-01	negative	-
BD_0321	BD-B-0007 R	Oral swab	NAP buffer	2021-08-01	negative	-
BD_0651	BD-B-0007 R	Liver	NAP buffer	2021-08-01	negative	-
BD_0725	BD-B-0007 R	Spleen	NAP buffer	2021-08-01	negative	-
BD_1027	BD-B-0007 R	Rectal swab	NAP buffer	2021-08-01	negative	-
BD_0877	BD-B-0007 R	Lung	NAP buffer	2021-08-01	negative	-
BD_0319	BD-B-0008 R	Oral swab	NAP buffer	2021-08-02	negative	-
BD_0646	BD-B-0008 R	Liver	NAP buffer	2021-08-02	negative	-
BD_0722	BD-B-0008 R	Spleen	NAP buffer	2021-08-02	negative	-
BD_1028	BD-B-0008 R	Rectal swab	NAP buffer	2021-08-02	negative	-
BD_0878	BD-B-0008 R	Lung	NAP buffer	2021-08-02	negative	-
BD_0314	BD-B-0009 R	Oral swab	NAP buffer	2021-08-02	negative	-
BD_0652	BD-B-0009 R	Liver	NAP buffer	2021-08-02	negative	-
BD_0719	BD-B-0009 R	Spleen	NAP buffer	2021-08-02	negative	-
BD_1029	BD-B-0009 R	Rectal swab	NAP buffer	2021-08-02	negative	-
BD_0879	BD-B-0009 R	Lung	NAP buffer	2021-08-02	negative	-
BD_0315	BD-B-0010 R	Oral swab	NAP buffer	2021-08-02	negative	-
BD_0648	BD-B-0010 R	Liver	NAP buffer	2021-08-02	negative	-
BD_0717	BD-B-0010 R	Spleen	NAP buffer	2021-08-02	negative	-
BD_1030	BD-B-0010 R	Rectal swab	NAP buffer	2021-08-02	negative	-
BD_0880	BD-B-0010 R	Lung	NAP buffer	2021-08-02	negative	-
BD_0325	BD-B-0011 R	Oral swab	NAP buffer	2021-08-02	negative	-
BD_0649	BD-B-0011 R	Liver	NAP buffer	2021-08-02	negative	-
BD_0716	BD-B-0011 R	Spleen	NAP buffer	2021-08-02	negative	-
BD_1031	BD-B-0011 R	Rectal swab	NAP buffer	2021-08-02	negative	-
BD_0881	BD-B-0011 R	Lung	NAP buffer	2021-08-02	negative	-
BD_0307	BD-B-0012 R	Oral swab	NAP buffer	2021-08-02	negative	-
BD_0645	BD-B-0012 R	Liver	NAP buffer	2021-08-02	negative	-
BD_0712	BD-B-0012 R	Spleen	NAP buffer	2021-08-02	negative	-
BD_1032	BD-B-0012 R	Rectal swab	NAP buffer	2021-08-02	negative	-
BD_0882	BD-B-0012 R	Lung	NAP buffer	2021-08-02	negative	-
BD_0681	BD-C-0036 R	Liver	NAP buffer	2021-08-02	negative	-
BD_0745	BD-C-0036 R	Spleen	NAP buffer	2021-08-02	negative	-
BD_1135	BD-C-0036 R	Rectal swab	NAP buffer	2021-08-02	negative	-
BD_0809	BD-C-0036 R	Lung	NAP buffer	2021-08-02	negative	-
BD_0501	BD-C-0037 R	Oral swab	NAP buffer	2021-08-02	negative	-
BD_1136	BD-C-0037 R	Rectal swab	NAP buffer	2021-08-02	negative	-
BD_0599	BD-C-0038 R	Oral swab	NAP buffer	2021-08-02	negative	-
BD_1137	BD-C-0038 R	Rectal swab	NAP buffer	2021-08-02	negative	-
BD_0508	BD-C-0039 R	Oral swab	NAP buffer	2021-08-02	negative	-
BD_1138	BD-C-0039 R	Rectal swab	NAP buffer	2021-08-02	negative	-
BD_0615	BD-C-0040 R	Oral swab	NAP buffer	2021-08-02	negative	-
BD_1139	BD-C-0040 R	Rectal swab	NAP buffer	2021-08-02	negative	-
BD_0495	BD-C-0041 R	Oral swab	NAP buffer	2021-08-02	negative	-
BD_1140	BD-C-0041 R	Rectal swab	NAP buffer	2021-08-02	negative	-
BD_0592	BD-C-0042 R	Oral swab	NAP buffer	2021-08-02	negative	-
BD_1141	BD-C-0042 R	Rectal swab	NAP buffer	2021-08-02	negative	-
BD_0613	BD-C-0043 R	Oral swab	NAP buffer	2021-08-02	negative	-
BD_0682	BD-C-0043 R	Liver	NAP buffer	2021-08-02	negative	-
BD_0765	BD-C-0043 R	Spleen	NAP buffer	2021-08-02	negative	-
BD_1142	BD-C-0043 R	Rectal swab	NAP buffer	2021-08-02	negative	-
BD_0821	BD-C-0043 R	Lung	NAP buffer	2021-08-02	negative	-
BD_0503	BD-C-0044 R	Oral swab	NAP buffer	2021-08-02	negative	-
BD_0699	BD-C-0044 R	Liver	NAP buffer	2021-08-02	negative	-
BD_0739	BD-C-0044 R	Spleen	NAP buffer	2021-08-02	negative	-
BD_1143	BD-C-0044 R	Rectal swab	NAP buffer	2021-08-02	negative	-
BD_0904	BD-C-0044 R	Lung	NAP buffer	2021-08-02	negative	-
BD_0606	BD-C-0036 R	Oral swab	NAP buffer	2021-08-02	negative	-
BD_0308	BD-B-0013 R	Oral swab	NAP buffer	2021-08-03	negative	-
BD_0642	BD-B-0013 R	Liver	NAP buffer	2021-08-03	negative	-
BD_0700	BD-B-0013 R	Spleen	NAP buffer	2021-08-03	negative	-
BD_1033	BD-B-0013 R	Rectal swab	NAP buffer	2021-08-03	negative	-
BD_0883	BD-B-0013 R	Lung	NAP buffer	2021-08-03	negative	-
BD_0299	BD-B-0014 R	Oral swab	NAP buffer	2021-08-03	negative	-
BD_0641	BD-B-0014 R	Liver	NAP buffer	2021-08-03	negative	-
BD_0714	BD-B-0014 R	Spleen	NAP buffer	2021-08-03	negative	-
BD_1034	BD-B-0014 R	Rectal swab	NAP buffer	2021-08-03	negative	-
BD_0884	BD-B-0014 R	Lung	NAP buffer	2021-08-03	negative	-
BD_0313	BD-B-0015 R	Oral swab	NAP buffer	2021-08-03	negative	-
BD_0632	BD-B-0015 R	Liver	NAP buffer	2021-08-03	negative	-
BD_0720	BD-B-0015 R	Spleen	NAP buffer	2021-08-03	negative	-
BD_1035	BD-B-0015 R	Rectal swab	NAP buffer	2021-08-03	negative	-
BD_0885	BD-B-0015 R	Lung	NAP buffer	2021-08-03	negative	-
BD_0316	BD-B-0016 R	Oral swab	NAP buffer	2021-08-03	negative	-
BD_0644	BD-B-0016 R	Liver	NAP buffer	2021-08-03	negative	-
BD_0718	BD-B-0016 R	Spleen	NAP buffer	2021-08-03	negative	-
BD_1036	BD-B-0016 R	Rectal swab	NAP buffer	2021-08-03	negative	-
BD_0912	BD-B-0016 R	Lung	NAP buffer	2021-08-03	negative	-
BD_0318	BD-B-0017 R	Oral swab	NAP buffer	2021-08-03	negative	-
BD_0633	BD-B-0017 R	Liver	NAP buffer	2021-08-03	negative	-
BD_0713	BD-B-0017 R	Spleen	NAP buffer	2021-08-03	negative	-
BD_1037	BD-B-0017 R	Rectal swab	NAP buffer	2021-08-03	negative	-
BD_0487	BD-C-0045 R	Oral swab	NAP buffer	2021-08-03	negative	-
BD_0485	BD-C-0046 R	Oral swab	NAP buffer	2021-08-03	negative	-
BD_1145	BD-C-0046 R	Rectal swab	NAP buffer	2021-08-03	negative	-
BD_0590	BD-C-0047 R	Oral swab	NAP buffer	2021-08-03	negative	-
BD_0590	BD-C-0047 R	Oral swab	NAP buffer	2021-08-03	negative	-
BD_1146	BD-C-0047 R	Rectal swab	NAP buffer	2021-08-03	negative	-
BD_0309	BD-B-0018 R	Oral swab	NAP buffer	2021-08-04	negative	-
BD_0628	BD-B-0018 R	Liver	NAP buffer	2021-08-04	negative	-
BD_0703	BD-B-0018 R	Spleen	NAP buffer	2021-08-04	negative	-
BD_1038	BD-B-0018 R	Rectal swab	NAP buffer	2021-08-04	negative	-
BD_0886	BD-B-0018 R	Lung	NAP buffer	2021-08-04	negative	-
BD_0496	BD-C-0048 R	Oral swab	NAP buffer	2021-08-04	negative	-
BD_1147	BD-C-0048 R	Rectal swab	NAP buffer	2021-08-04	negative	-
BD_0621	BD-C-0049 R	Oral swab	NAP buffer	2021-08-04	negative	-
BD_1148	BD-C-0049 R	Rectal swab	NAP buffer	2021-08-04	negative	-
BD_1149	BD-C-0050 R	Rectal swab	NAP buffer	2021-08-04	negative	-
BD_0493	BD-C-0051 R	Oral swab	NAP buffer	2021-08-04	negative	-
BD_1150	BD-C-0051 R	Rectal swab	NAP buffer	2021-08-04	negative	-
BD_0505	BD-C-0052 R	Oral swab	NAP buffer	2021-08-04	negative	-
BD_0687	BD-C-0052 R	Liver	NAP buffer	2021-08-04	negative	-
BD_0743	BD-C-0052 R	Spleen	NAP buffer	2021-08-04	negative	-
BD_0505	BD-C-0052 R	Oral swab	NAP buffer	2021-08-04	negative	-
BD_1151	BD-C-0052 R	Rectal swab	NAP buffer	2021-08-04	negative	-
BD_0822	BD-C-0052 R	Lung	NAP buffer	2021-08-04	negative	-
BD_0310	BD-B-0019 R	Oral swab	NAP buffer	2021-08-05	negative	-
BD_0627	BD-B-0019 R	Liver	NAP buffer	2021-08-05	negative	-
BD_0711	BD-B-0019 R	Spleen	NAP buffer	2021-08-05	negative	-
BD_1039	BD-B-0019 R	Rectal swab	NAP buffer	2021-08-05	negative	-
BD_0887	BD-B-0019 R	Lung	NAP buffer	2021-08-05	negative	-
BD_0311	BD-B-0020 R	Oral swab	NAP buffer	2021-08-05	negative	-
BD_0631	BD-B-0020 R	Liver	NAP buffer	2021-08-05	negative	-
BD_0603	BD-C-0053 R	Oral swab	NAP buffer	2021-08-05	negative	-
BD_1152	BD-C-0053 R	Rectal swab	NAP buffer	2021-08-05	negative	-
BD_0609	BD-C-0054 R	Oral swab	NAP buffer	2021-08-05	negative	-
BD_0680	BD-C-0054 R	Liver	NAP buffer	2021-08-05	negative	-
BD_0757	BD-C-0054 R	Spleen	NAP buffer	2021-08-05	negative	-
BD_1153	BD-C-0054 R	Rectal swab	NAP buffer	2021-08-05	negative	-
BD_0905	BD-C-0054 R	Lung	NAP buffer	2021-08-05	negative	-
BD_0490	BD-C-0055 R	Oral swab	NAP buffer	2021-08-05	negative	-
BD_0605	BD-C-0056 R	Oral swab	NAP buffer	2021-08-05	negative	-
BD_0684	BD-C-0056 R	Liver	NAP buffer	2021-08-05	negative	-
BD_0742	BD-C-0056 R	Spleen	NAP buffer	2021-08-05	negative	-
BD_1155	BD-C-0056 R	Rectal swab	NAP buffer	2021-08-05	negative	-
BD_0906	BD-C-0056 R	Lung	NAP buffer	2021-08-05	negative	-
BD_0586	BD-C-0057 R	Oral swab	NAP buffer	2021-08-05	negative	-
BD_1156	BD-C-0057 R	Rectal swab	NAP buffer	2021-08-05	negative	-
BD_0306	BD-B-0021 R	Oral swab	NAP buffer	2021-08-06	negative	-
BD_0305	BD-B-0022 R	Oral swab	NAP buffer	2021-08-06	negative	-
BD_1042	BD-B-0022 R	Rectal swab	NAP buffer	2021-08-06	negative	-
BD_0611	BD-C-0058 R	Oral swab	NAP buffer	2021-08-06	negative	-
BD_1157	BD-C-0058 R	Rectal swab	NAP buffer	2021-08-06	negative	-
BD_0488	BD-C-0059 R	Oral swab	NAP buffer	2021-08-06	negative	-
BD_1158	BD-C-0059 R	Rectal swab	NAP buffer	2021-08-06	negative	-
BD_0491	BD-C-0060 R	Oral swab	NAP buffer	2021-08-06	negative	-
BD_0677	BD-C-0060 R	Liver	NAP buffer	2021-08-06	negative	-
BD_0753	BD-C-0060 R	Spleen	NAP buffer	2021-08-06	negative	-
BD_1159	BD-C-0060 R	Rectal swab	NAP buffer	2021-08-06	negative	-
BD_0830	BD-C-0060 R	Lung	NAP buffer	2021-08-06	negative	-
BD_0297	BD-B-0023 R	Oral swab	NAP buffer	2021-08-07	negative	-
BD_1043	BD-B-0023 R	Rectal swab	NAP buffer	2021-08-07	negative	-
BD_0630	BD-B-0024 R	Liver	NAP buffer	2021-08-07	negative	-
BD_0715	BD-B-0024 R	Spleen	NAP buffer	2021-08-07	negative	-
BD_1044	BD-B-0024 R	Rectal swab	NAP buffer	2021-08-07	negative	-
BD_0801	BD-B-0024 R	Lung	NAP buffer	2021-08-07	negative	-
BD_0302	BD-B-0025 R	Oral swab	NAP buffer	2021-08-07	negative	-
BD_1045	BD-B-0025 R	Rectal swab	NAP buffer	2021-08-07	negative	-
BD_0300	BD-B-0026 R	Oral swab	NAP buffer	2021-08-07	negative	-
BD_0629	BD-B-0026 R	Liver	NAP buffer	2021-08-07	negative	-
BD_0701	BD-B-0026 R	Spleen	NAP buffer	2021-08-07	negative	-
BD_1046	BD-B-0026 R	Rectal swab	NAP buffer	2021-08-07	negative	-
BD_0802	BD-B-0026 R	Lung	NAP buffer	2021-08-07	negative	-
BD_0489	BD-C-0061 R	Oral swab	NAP buffer	2021-08-07	negative	-
BD_1160	BD-C-0061 R	Rectal swab	NAP buffer	2021-08-07	negative	-
BD_0494	BD-C-0062 R	Oral swab	NAP buffer	2021-08-07	negative	-
BD_1161	BD-C-0062 R	Rectal swab	NAP buffer	2021-08-07	negative	-
BD_0502	BD-C-0063 R	Oral swab	NAP buffer	2021-08-07	negative	-
BD_1162	BD-C-0063 R	Rectal swab	NAP buffer	2021-08-07	negative	-
BD_0600	BD-C-0064 R	Oral swab	NAP buffer	2021-08-07	negative	-
BD_1163	BD-C-0064 R	Rectal swab	NAP buffer	2021-08-07	negative	-
BD_0499	BD-C-0065 R	Oral swab	NAP buffer	2021-08-07	negative	-
BD_1164	BD-C-0065 R	Rectal swab	NAP buffer	2021-08-07	negative	-
BD_0617	BD-C-0066 R	Oral swab	NAP buffer	2021-08-07	negative	-
BD_0673	BD-C-0066 R	Liver	NAP buffer	2021-08-07	negative	-
BD_0744	BD-C-0066 R	Spleen	NAP buffer	2021-08-07	negative	-
BD_1165	BD-C-0066 R	Rectal swab	NAP buffer	2021-08-07	negative	-
BD_0808	BD-C-0066 R	Lung	NAP buffer	2021-08-07	negative	-
BD_0620	BD-C-0067 R	Oral swab	NAP buffer	2021-08-08	negative	-
BD_1166	BD-C-0067 R	Rectal swab	NAP buffer	2021-08-08	negative	-
BD_0616	BD-C-0068 R	Oral swab	NAP buffer	2021-08-08	negative	-
BD_1167	BD-C-0068 R	Rectal swab	NAP buffer	2021-08-08	negative	-
BD_0497	BD-C-0069 R	Oral swab	NAP buffer	2021-08-08	negative	-
BD_0497	BD-C-0069 R	Oral swab	NAP buffer	2021-08-08	negative	-
BD_0492	BD-C-0070 R	Oral swab	NAP buffer	2021-08-08	negative	-
BD_0685	BD-C-0070 R	Liver	NAP buffer	2021-08-08	negative	-
BD_0762	BD-C-0070 R	Spleen	NAP buffer	2021-08-08	negative	-
BD_1169	BD-C-0070 R	Rectal swab	NAP buffer	2021-08-08	negative	-
BD_0907	BD-C-0070 R	Lung	NAP buffer	2021-08-08	negative	-
BD_0298	BD-B-0027 R	Oral swab	NAP buffer	2021-08-09	negative	-
BD_1047	BD-B-0027 R	Rectal swab	NAP buffer	2021-08-09	negative	-
BD_0301	BD-B-0028 R	Oral swab	NAP buffer	2021-08-09	negative	-
BD_1048	BD-B-0028 R	Rectal swab	NAP buffer	2021-08-09	negative	-
BD_0303	BD-B-0029 R	Oral swab	NAP buffer	2021-08-09	negative	-
BD_0626	BD-B-0029 R	Liver	NAP buffer	2021-08-09	negative	-
BD_0702	BD-B-0029 R	Spleen	NAP buffer	2021-08-09	negative	-
BD_0800	BD-B-0029 R	Lung	NAP buffer	2021-08-09	negative	-
BD_0304	BD-B-0030 R	Oral swab	NAP buffer	2021-08-09	negative	-
BD_0625	BD-B-0030 R	Liver	NAP buffer	2021-08-09	negative	-
BD_1050	BD-B-0030 R	Rectal swab	NAP buffer	2021-08-09	negative	-
BD_0824	BD-B-0030 R	Lung	NAP buffer	2021-08-09	negative	-
BD_0370	BD-B-0031 R	Oral swab	NAP buffer	2021-08-10	negative	-
BD_0350	BD-B-0032 R	Oral swab	NAP buffer	2021-08-10	negative	-
BD_0333	BD-B-0033 R	Oral swab	NAP buffer	2021-08-10	negative	-
BD_0333	BD-B-0033 R	Oral swab	NAP buffer	2021-08-10	negative	-
BD_0365	BD-B-0034 R	Oral swab	NAP buffer	2021-08-10	negative	-
BD_0659	BD-B-0034 R	Liver	NAP buffer	2021-08-10	negative	-
BD_0731	BD-B-0034 R	Spleen	NAP buffer	2021-08-10	negative	-
BD_1054	BD-B-0034 R	Rectal swab	NAP buffer	2021-08-10	negative	-
BD_0805	BD-B-0034 R	Lung	NAP buffer	2021-08-10	negative	-
BD_0888	BD-B-0034 R	Lung	NAP buffer	2021-08-10	negative	-
BD_0364	BD-B-0035 R	Oral swab	NAP buffer	2021-08-10	negative	-
BD_0344	BD-B-0036 R	Oral swab	NAP buffer	2021-08-11	negative	-
BD_1056	BD-B-0036 R	Rectal swab	NAP buffer	2021-08-11	negative	-
BD_0363	BD-B-0037 R	Oral swab	NAP buffer	2021-08-11	negative	-
BD_0663	BD-B-0037 R	Liver	NAP buffer	2021-08-11	negative	-
BD_0734	BD-B-0037 R	Spleen	NAP buffer	2021-08-11	negative	-
BD_1057	BD-B-0037 R	Rectal swab	NAP buffer	2021-08-11	negative	-
BD_0889	BD-B-0037 R	Lung	NAP buffer	2021-08-11	negative	-
BD_0358	BD-B-0038 R	Oral swab	NAP buffer	2021-08-11	negative	-
BD_1058	BD-B-0038 R	Rectal swab	NAP buffer	2021-08-11	negative	-
BD_0366	BD-B-0039 R	Oral swab	NAP buffer	2021-08-11	negative	-
BD_0658	BD-B-0039 R	Liver	NAP buffer	2021-08-11	negative	-
BD_0730	BD-B-0039 R	Spleen	NAP buffer	2021-08-11	negative	-
BD_0815	BD-B-0039 R	Lung	NAP buffer	2021-08-11	negative	-
BD_0332	BD-B-0040 R	Oral swab	NAP buffer	2021-08-11	negative	-
BD_0331	BD-B-0041 R	Oral swab	NAP buffer	2021-08-11	negative	-
BD_0351	BD-B-0042 R	Oral swab	NAP buffer	2021-08-11	negative	-
BD_0660	BD-B-0042 R	Liver	NAP buffer	2021-08-11	negative	-
BD_1062	BD-B-0042 R	Rectal swab	NAP buffer	2021-08-11	negative	-
BD_0818	BD-B-0042 R	Lung	NAP buffer	2021-08-11	negative	-
BD_0367	BD-B-0043 R	Oral swab	NAP buffer	2021-08-11	negative	-
BD_0657	BD-B-0043 R	Liver	NAP buffer	2021-08-11	negative	-
BD_0732	BD-B-0043 R	Spleen	NAP buffer	2021-08-11	negative	-
BD_0359	BD-B-0044 R	Oral swab	NAP buffer	2021-08-12	negative	-
BD_1064	BD-B-0044 R	Rectal swab	NAP buffer	2021-08-12	negative	-
BD_0357	BD-B-0045 R	Oral swab	NAP buffer	2021-08-12	negative	-
BD_0341	BD-B-0046 R	Oral swab	NAP buffer	2021-08-12	negative	-
BD_0373	BD-B-0047 R	Oral swab	NAP buffer	2021-08-12	negative	-
BD_0329	BD-B-0048 R	Oral swab	NAP buffer	2021-08-13	negative	-
BD_1068	BD-B-0048 R	Rectal swab	NAP buffer	2021-08-13	negative	-
BD_0346	BD-B-0049 R	Oral swab	NAP buffer	2021-08-13	negative	-
BD_0326	BD-B-0050 R	Oral swab	NAP buffer	2021-08-13	negative	-
BD_1070	BD-B-0050 R	Rectal swab	NAP buffer	2021-08-13	negative	-
BD_0338	BD-B-0051 R	Oral swab	NAP buffer	2021-08-13	negative	-
BD_0328	BD-B-0052 R	Oral swab	NAP buffer	2021-08-13	negative	-
BD_1072	BD-B-0052 R	Rectal swab	NAP buffer	2021-08-13	negative	-
BD_0348	BD-B-0053 R	Oral swab	NAP buffer	2021-08-13	negative	-
BD_0355	BD-B-0054 R	Oral swab	NAP buffer	2021-08-13	negative	-
BD_0662	BD-B-0054 R	Liver	NAP buffer	2021-08-13	negative	-
BD_0733	BD-B-0054 R	Spleen	NAP buffer	2021-08-13	negative	-
BD_1074	BD-B-0054 R	Rectal swab	NAP buffer	2021-08-13	negative	-
BD_0806	BD-B-0054 R	Lung	NAP buffer	2021-08-13	negative	-
BD_0347	BD-B-0055 R	Oral swab	NAP buffer	2021-08-13	negative	-
BD_1075	BD-B-0055 R	Rectal swab	NAP buffer	2021-08-13	negative	-
BD_0368	BD-B-0056 R	Oral swab	NAP buffer	2021-08-13	negative	-
BD_1076	BD-B-0056 R	Rectal swab	NAP buffer	2021-08-13	negative	-
BD_0360	BD-B-0057 R	Oral swab	NAP buffer	2021-08-14	negative	-
BD_0371	BD-B-0058 R	Oral swab	NAP buffer	2021-08-14	negative	-
BD_0335	BD-B-0059 R	Oral swab	NAP buffer	2021-08-15	negative	-
BD_1079	BD-B-0059 R	Rectal swab	NAP buffer	2021-08-15	negative	-
BD_0375	BD-B-0060 R	Oral swab	NAP buffer	2021-08-15	negative	-
BD_0345	BD-B-0061 R	Oral swab	NAP buffer	2021-08-15	negative	-
BD_0661	BD-B-0061 R	Liver	NAP buffer	2021-08-15	negative	-
BD_1081	BD-B-0061 R	Rectal swab	NAP buffer	2021-08-15	negative	-
BD_0817	BD-B-0061 R	Lung	NAP buffer	2021-08-15	negative	-
BD_0890	BD-B-0061 R	Lung	NAP buffer	2021-08-15	negative	-
BD_0411	BD-A-0001 R	Oral swab	NAP buffer	2021-08-16	negative	-
BD_0916	BD-A-0001 R	Rectal swab	NAP buffer	2021-08-16	negative	-
BD_0440	BD-A-0002 R	Oral swab	NAP buffer	2021-08-16	negative	-
BD_0917	BD-A-0002 R	Rectal swab	NAP buffer	2021-08-16	negative	-
BD_0415	BD-A-0003 R	Oral swab	NAP buffer	2021-08-16	negative	-
BD_0918	BD-A-0003 R	Rectal swab	NAP buffer	2021-08-16	negative	-
BD_0475	BD-A-0004 R	Oral swab	NAP buffer	2021-08-16	negative	-
BD_0475	BD-A-0004 R	Oral swab	NAP buffer	2021-08-16	negative	-
BD_0919	BD-A-0004 R	Rectal swab	NAP buffer	2021-08-16	negative	-
BD_0468	BD-A-0005 R	Oral swab	NAP buffer	2021-08-16	negative	-
BD_0664	BD-A-0005 R	Liver	NAP buffer	2021-08-16	negative	-
BD_0709	BD-A-0005 R	Spleen	NAP buffer	2021-08-16	negative	-
BD_0920	BD-A-0005 R	Rectal swab	NAP buffer	2021-08-16	negative	-
BD_0867	BD-A-0005 R	Lung	NAP buffer	2021-08-16	negative	-
BD_0444	BD-A-0006 R	Oral swab	NAP buffer	2021-08-16	negative	-
BD_0921	BD-A-0006 R	Rectal swab	NAP buffer	2021-08-16	negative	-
BD_0467	BD-A-0007 R	Oral swab	NAP buffer	2021-08-16	negative	-
BD_0637	BD-A-0007 R	Liver	NAP buffer	2021-08-16	negative	-
BD_0738	BD-A-0007 R	Spleen	NAP buffer	2021-08-16	negative	-
BD_0922	BD-A-0007 R	Rectal swab	NAP buffer	2021-08-16	negative	-
BD_0868	BD-A-0007 R	Lung	NAP buffer	2021-08-16	negative	-
BD_0340	BD-B-0062 R	Oral swab	NAP buffer	2021-08-16	negative	-
BD_0369	BD-B-0063 R	Oral swab	NAP buffer	2021-08-16	negative	-
BD_0352	BD-B-0064 R	Oral swab	NAP buffer	2021-08-16	negative	-
BD_0361	BD-B-0065 R	Oral swab	NAP buffer	2021-08-16	negative	-
BD_0354	BD-B-0066 R	Oral swab	NAP buffer	2021-08-16	negative	-
BD_0656	BD-B-0066 R	Liver	NAP buffer	2021-08-16	negative	-
BD_0729	BD-B-0066 R	Spleen	NAP buffer	2021-08-16	negative	-
BD_0803	BD-B-0066 R	Lung	NAP buffer	2021-08-16	negative	-
BD_0891	BD-B-0066 R	Lung	NAP buffer	2021-08-16	negative	-
BD_0406	BD-A-0008 R	Oral swab	NAP buffer	2021-08-17	negative	-
BD_0443	BD-A-0009 R	Oral swab	NAP buffer	2021-08-17	negative	-
BD_0924	BD-A-0009 R	Rectal swab	NAP buffer	2021-08-17	negative	-
BD_0431	BD-A-0010 R	Oral swab	NAP buffer	2021-08-17	negative	-
BD_0925	BD-A-0010 R	Rectal swab	NAP buffer	2021-08-17	negative	-
BD_0434	BD-A-0011 R	Oral swab	NAP buffer	2021-08-17	negative	-
BD_0640	BD-A-0011 R	Liver	NAP buffer	2021-08-17	negative	-
BD_0704	BD-A-0011 R	Spleen	NAP buffer	2021-08-17	negative	-
BD_0926	BD-A-0011 R	Rectal swab	NAP buffer	2021-08-17	negative	-
BD_0869	BD-A-0011 R	Lung	NAP buffer	2021-08-17	negative	-
BD_0420	BD-A-0012 R	Oral swab	NAP buffer	2021-08-17	negative	-
BD_0927	BD-A-0012 R	Rectal swab	NAP buffer	2021-08-17	negative	-
BD_0349	BD-B-0067 R	Oral swab	NAP buffer	2021-08-17	negative	-
BD_0330	BD-B-0068 R	Oral swab	NAP buffer	2021-08-17	negative	-
BD_0327	BD-B-0069 R	Rectal swab	NAP buffer	2021-08-17	negative	-
BD_0374	BD-B-0069 R	Oral swab	NAP buffer	2021-08-17	negative	-
BD_1089	BD-B-0069 R	Rectal swab	NAP buffer	2021-08-17	negative	-
BD_0353	BD-B-0070 R	Oral swab	NAP buffer	2021-08-17	negative	-
BD_0337	BD-B-0071 R	Oral swab	NAP buffer	2021-08-17	negative	-
BD_1091	BD-B-0071 R	Rectal swab	NAP buffer	2021-08-17	negative	-
BD_0336	BD-B-0072 R	Oral swab	NAP buffer	2021-08-17	negative	-
BD_1092	BD-B-0072 R	Rectal swab	NAP buffer	2021-08-17	negative	-
BD_0343	BD-B-0073 R	Oral swab	NAP buffer	2021-08-17	negative	-
BD_1093	BD-B-0073 R	Rectal swab	NAP buffer	2021-08-17	negative	-
BD_0372	BD-B-0074 R	Oral swab	NAP buffer	2021-08-17	negative	-
BD_0460	BD-A-0013 R	Oral swab	NAP buffer	2021-08-18	negative	-
BD_0460	BD-A-0013 R	Oral swab	NAP buffer	2021-08-18	negative	-
BD_0425	BD-A-0014 R	Oral swab	NAP buffer	2021-08-18	negative	-
BD_0929	BD-A-0014 R	Rectal swab	NAP buffer	2021-08-18	negative	-
BD_0483	BD-A-0015 R	Oral swab	NAP buffer	2021-08-18	negative	-
BD_0930	BD-A-0015 R	Rectal swab	NAP buffer	2021-08-18	negative	-
BD_0454	BD-A-0016 R	Oral swab	NAP buffer	2021-08-18	negative	-
BD_0931	BD-A-0016 R	Rectal swab	NAP buffer	2021-08-18	negative	-
BD_0445	BD-A-0017 R	Oral swab	NAP buffer	2021-08-18	negative	-
BD_0932	BD-A-0017 R	Rectal swab	NAP buffer	2021-08-18	negative	-
BD_0447	BD-A-0018 R	Oral swab	NAP buffer	2021-08-18	negative	-
BD_0933	BD-A-0018 R	Rectal swab	NAP buffer	2021-08-18	negative	-
BD_0439	BD-A-0019 R	Oral swab	NAP buffer	2021-08-18	negative	-
BD_0934	BD-A-0019 R	Rectal swab	NAP buffer	2021-08-18	negative	-
BD_0459	BD-A-0020 R	Oral swab	NAP buffer	2021-08-18	negative	-
BD_0935	BD-A-0020 R	Rectal swab	NAP buffer	2021-08-18	negative	-
BD_0429	BD-A-0021 R	Oral swab	NAP buffer	2021-08-18	negative	-
BD_0936	BD-A-0021 R	Rectal swab	NAP buffer	2021-08-18	negative	-
BD_0407	BD-A-0022 R	Oral swab	NAP buffer	2021-08-18	negative	-
BD_0937	BD-A-0022 R	Rectal swab	NAP buffer	2021-08-18	negative	-
BD_0476	BD-A-0023 R	Oral swab	NAP buffer	2021-08-18	negative	-
BD_0938	BD-A-0023 R	Rectal swab	NAP buffer	2021-08-18	negative	-
BD_0479	BD-A-0024 R	Oral swab	NAP buffer	2021-08-18	negative	-
BD_0939	BD-A-0024 R	Rectal swab	NAP buffer	2021-08-18	negative	-
BD_0356	BD-B-0075 R	Oral swab	NAP buffer	2021-08-18	negative	-
BD_0457	BD-A-0025 R	Oral swab	NAP buffer	2021-08-19	negative	-
BD_0940	BD-A-0025 R	Rectal swab	NAP buffer	2021-08-19	negative	-
BD_0452	BD-A-0026 R	Oral swab	NAP buffer	2021-08-19	negative	-
BD_0941	BD-A-0026 R	Rectal swab	NAP buffer	2021-08-19	negative	-
BD_0448	BD-A-0027 R	Oral swab	NAP buffer	2021-08-19	negative	-
BD_0942	BD-A-0027 R	Rectal swab	NAP buffer	2021-08-19	negative	-
BD_0412	BD-A-0028 R	Oral swab	NAP buffer	2021-08-19	negative	-
BD_0943	BD-A-0028 R	Rectal swab	NAP buffer	2021-08-19	negative	-
BD_0386	BD-A-0029 R	Oral swab	NAP buffer	2021-08-19	negative	-
BD_0944	BD-A-0029 R	Rectal swab	NAP buffer	2021-08-19	negative	-
BD_0437	BD-A-0030 R	Oral swab	NAP buffer	2021-08-19	negative	-
BD_0945	BD-A-0030 R	Rectal swab	NAP buffer	2021-08-19	negative	-
BD_0342	BD-B-0076 R	Oral swab	NAP buffer	2021-08-19	negative	-
BD_1096	BD-B-0076 R	Rectal swab	NAP buffer	2021-08-19	negative	-
BD_0339	BD-B-0077 R	Oral swab	NAP buffer	2021-08-19	negative	-
BD_1097	BD-B-0077 R	Rectal swab	NAP buffer	2021-08-19	negative	-
BD_0334	BD-B-0078 R	Oral swab	NAP buffer	2021-08-19	negative	-
BD_1098	BD-B-0078 R	Rectal swab	NAP buffer	2021-08-19	negative	-
BD_0946	BD-A-0031 R	Rectal swab	NAP buffer	2021-08-20	negative	-
BD_0451	BD-A-0032 R	Oral swab	NAP buffer	2021-08-20	negative	-
BD_0947	BD-A-0032 R	Rectal swab	NAP buffer	2021-08-20	negative	-
BD_0397	BD-A-0033 R	Oral swab	NAP buffer	2021-08-20	negative	-
BD_0450	BD-A-0034 R	Oral swab	NAP buffer	2021-08-20	negative	-
BD_0949	BD-A-0034 R	Rectal swab	NAP buffer	2021-08-20	negative	-
BD_0433	BD-A-0035 R	Oral swab	NAP buffer	2021-08-20	negative	-
BD_0670	BD-A-0035 R	Liver	NAP buffer	2021-08-20	negative	-
BD_0710	BD-A-0035 R	Spleen	NAP buffer	2021-08-20	negative	-
BD_0433	BD-A-0035 R	Oral swab	NAP buffer	2021-08-20	negative	-
BD_0950	BD-A-0035 R	Rectal swab	NAP buffer	2021-08-20	negative	-
BD_0813	BD-A-0035 R	Lung	NAP buffer	2021-08-20	negative	-
BD_0458	BD-A-0036 R	Oral swab	NAP buffer	2021-08-20	negative	-
BD_0951	BD-A-0036 R	Rectal swab	NAP buffer	2021-08-20	negative	-
BD_0427	BD-A-0037 R	Oral swab	NAP buffer	2021-08-20	negative	-
BD_0952	BD-A-0037 R	Rectal swab	NAP buffer	2021-08-20	negative	-
BD_0430	BD-A-0038 R	Oral swab	NAP buffer	2021-08-20	negative	-
BD_0953	BD-A-0038 R	Rectal swab	NAP buffer	2021-08-20	negative	-
BD_0382	BD-A-0039 R	Oral swab	NAP buffer	2021-08-20	negative	-
BD_0954	BD-A-0039 R	Rectal swab	NAP buffer	2021-08-20	negative	-
BD_0426	BD-A-0040 R	Oral swab	NAP buffer	2021-08-20	negative	-
BD_0955	BD-A-0040 R	Rectal swab	NAP buffer	2021-08-20	negative	-
BD_0469	BD-A-0041 R	Oral swab	NAP buffer	2021-08-20	negative	-
BD_0638	BD-A-0041 R	Liver	NAP buffer	2021-08-20	negative	-
BD_0956	BD-A-0041 R	Rectal swab	NAP buffer	2021-08-20	negative	-
BD_0870	BD-A-0041 R	Lung	NAP buffer	2021-08-20	negative	-
BD_0391	BD-A-0042 R	Oral swab	NAP buffer	2021-08-20	negative	-
BD_0957	BD-A-0042 R	Rectal swab	NAP buffer	2021-08-20	negative	-
BD_0449	BD-A-0043 R	Oral swab	NAP buffer	2021-08-21	negative	-
BD_0958	BD-A-0043 R	Rectal swab	NAP buffer	2021-08-21	negative	-
BD_0409	BD-A-0044 R	Oral swab	NAP buffer	2021-08-22	negative	-
BD_0959	BD-A-0044 R	Rectal swab	NAP buffer	2021-08-22	negative	-
BD_0464	BD-A-0045 R	Oral swab	NAP buffer	2021-08-22	negative	-
BD_0960	BD-A-0045 R	Rectal swab	NAP buffer	2021-08-22	negative	-
BD_0482	BD-A-0046 R	Oral swab	NAP buffer	2021-08-22	negative	-
BD_0961	BD-A-0046 R	Rectal swab	NAP buffer	2021-08-22	negative	-
BD_0410	BD-A-0047 R	Oral swab	NAP buffer	2021-08-22	negative	-
BD_0636	BD-A-0047 R	Liver	NAP buffer	2021-08-22	negative	-
BD_0668	BD-A-0047 R	Liver	NAP buffer	2021-08-22	negative	-
BD_0708	BD-A-0047 R	Spleen	NAP buffer	2021-08-22	negative	-
BD_0962	BD-A-0047 R	Rectal swab	NAP buffer	2021-08-22	negative	-
BD_0871	BD-A-0047 R	Lung	NAP buffer	2021-08-22	negative	-
BD_0442	BD-A-0048 R	Oral swab	NAP buffer	2021-08-22	negative	-
BD_0963	BD-A-0048 R	Rectal swab	NAP buffer	2021-08-22	negative	-
BD_0472	BD-A-0049 R	Oral swab	NAP buffer	2021-08-22	negative	-
BD_0667	BD-A-0049 R	Liver	NAP buffer	2021-08-22	negative	-
BD_0964	BD-A-0049 R	Rectal swab	NAP buffer	2021-08-22	negative	-
BD_0814	BD-A-0049 R	Lung	NAP buffer	2021-08-22	negative	-
BD_0441	BD-A-0050 R	Oral swab	NAP buffer	2021-08-23	negative	-
BD_0965	BD-A-0050 R	Rectal swab	NAP buffer	2021-08-23	negative	-
BD_0423	BD-A-0051 R	Oral swab	NAP buffer	2021-08-23	negative	-
BD_0966	BD-A-0051 R	Rectal swab	NAP buffer	2021-08-23	negative	-
BD_0481	BD-A-0052 R	Oral swab	NAP buffer	2021-08-23	negative	-
BD_0967	BD-A-0052 R	Rectal swab	NAP buffer	2021-08-23	negative	-
BD_0383	BD-A-0053 R	Oral swab	NAP buffer	2021-08-23	negative	-
BD_0480	BD-A-0054 R	Oral swab	NAP buffer	2021-08-23	negative	-
BD_0969	BD-A-0054 R	Rectal swab	NAP buffer	2021-08-23	negative	-
BD_0466	BD-A-0055 R	Oral swab	NAP buffer	2021-08-23	negative	-
BD_0477	BD-A-0056 R	Oral swab	NAP buffer	2021-08-23	negative	-
BD_0639	BD-A-0056 R	Liver	NAP buffer	2021-08-23	negative	-
BD_0669	BD-A-0056 R	Liver	NAP buffer	2021-08-23	negative	-
BD_0705	BD-A-0056 R	Spleen	NAP buffer	2021-08-23	negative	-
BD_0971	BD-A-0056 R	Rectal swab	NAP buffer	2021-08-23	negative	-
BD_0826	BD-A-0056 R	Lung	NAP buffer	2021-08-23	negative	-
BD_0408	BD-A-0057 R	Oral swab	NAP buffer	2021-08-24	negative	-
BD_0972	BD-A-0057 R	Rectal swab	NAP buffer	2021-08-24	negative	-
BD_0432	BD-A-0058 R	Oral swab	NAP buffer	2021-08-24	negative	-
BD_0378	BD-A-0059 R	Oral swab	NAP buffer	2021-08-24	negative	-
BD_0377	BD-A-0060 R	Oral swab	NAP buffer	2021-08-24	negative	-
BD_0975	BD-A-0060 R	Rectal swab	NAP buffer	2021-08-24	negative	-
BD_0394	BD-A-0061 R	Oral swab	NAP buffer	2021-08-24	negative	-
BD_0976	BD-A-0061 R	Rectal swab	NAP buffer	2021-08-24	negative	-
BD_0422	BD-A-0062 R	Oral swab	NAP buffer	2021-08-24	negative	-
BD_0977	BD-A-0062 R	Rectal swab	NAP buffer	2021-08-24	negative	-
BD_0571	BD-V-0001 R	Oral swab	NAP buffer	2021-08-24	negative	-
BD_1170	BD-V-0001 R	Rectal swab	NAP buffer	2021-08-24	negative	-
BD_0573	BD-V-0002 R	Oral swab	NAP buffer	2021-08-24	negative	-
BD_1171	BD-V-0002 R	Rectal swab	NAP buffer	2021-08-24	negative	-
BD_0548	BD-V-0003 R	Oral swab	NAP buffer	2021-08-24	negative	-
BD_1172	BD-V-0003 R	Rectal swab	NAP buffer	2021-08-24	negative	-
BD_0542	BD-V-0004 R	Oral swab	NAP buffer	2021-08-24	negative	-
BD_1173	BD-V-0004 R	Rectal swab	NAP buffer	2021-08-24	negative	-
BD_0556	BD-V-0005 R	Oral swab	NAP buffer	2021-08-24	negative	-
BD_1174	BD-V-0005 R	Rectal swab	NAP buffer	2021-08-24	negative	-
BD_0535	BD-V-0006 R	Oral swab	NAP buffer	2021-08-24	negative	-
BD_0543	BD-V-0007 R	Oral swab	NAP buffer	2021-08-24	negative	-
BD_0563	BD-V-0008 R	Oral swab	NAP buffer	2021-08-24	negative	-
BD_1177	BD-V-0008 R	Rectal swab	NAP buffer	2021-08-24	negative	-
BD_1176	BD-V-0007 R	Rectal swab	NAP buffer	2021-08-24	negative	-
BD_0403	BD-A-0063 R	Oral swab	NAP buffer	2021-08-25	negative	-
BD_0474	BD-A-0064 R	Oral swab	NAP buffer	2021-08-25	negative	-
BD_0979	BD-A-0064 R	Rectal swab	NAP buffer	2021-08-25	negative	-
BD_0428	BD-A-0065 R	Oral swab	NAP buffer	2021-08-25	negative	-
BD_0980	BD-A-0065 R	Rectal swab	NAP buffer	2021-08-25	negative	-
BD_0470	BD-A-0066 R	Oral swab	NAP buffer	2021-08-25	negative	-
BD_0462	BD-A-0067 R	Oral swab	NAP buffer	2021-08-25	negative	-
BD_0982	BD-A-0067 R	Rectal swab	NAP buffer	2021-08-25	negative	-
BD_0436	BD-A-0068 R	Oral swab	NAP buffer	2021-08-25	negative	-
BD_0983	BD-A-0068 R	Rectal swab	NAP buffer	2021-08-25	negative	-
BD_0401	BD-A-0069 R	Oral swab	NAP buffer	2021-08-25	negative	-
BD_0666	BD-A-0069 R	Liver	NAP buffer	2021-08-25	negative	-
BD_0735	BD-A-0069 R	Spleen	NAP buffer	2021-08-25	negative	-
BD_0984	BD-A-0069 R	Rectal swab	NAP buffer	2021-08-25	negative	-
BD_0872	BD-A-0069 R	Lung	NAP buffer	2021-08-25	negative	-
BD_0513	BD-V-0009 R	Oral swab	NAP buffer	2021-08-25	negative	-
BD_1178	BD-V-0009 R	Rectal swab	NAP buffer	2021-08-25	negative	-
BD_0529	BD-V-0010 R	Oral swab	NAP buffer	2021-08-25	negative	-
BD_1179	BD-V-0010 R	Rectal swab	NAP buffer	2021-08-25	negative	-
BD_0536	BD-V-0011 R	Oral swab	NAP buffer	2021-08-25	negative	-
BD_0552	BD-V-0012 R	Oral swab	NAP buffer	2021-08-25	negative	-
BD_1181	BD-V-0012 R	Rectal swab	NAP buffer	2021-08-25	negative	-
BD_0546	BD-V-0013 R	Oral swab	NAP buffer	2021-08-25	negative	-
BD_1182	BD-V-0013 R	Rectal swab	NAP buffer	2021-08-25	negative	-
BD_0463	BD-A-0070 R	Oral swab	NAP buffer	2021-08-26	negative	-
BD_0985	BD-A-0070 R	Rectal swab	NAP buffer	2021-08-26	negative	-
BD_0446	BD-A-0071 R	Oral swab	NAP buffer	2021-08-26	negative	-
BD_0986	BD-A-0071 R	Rectal swab	NAP buffer	2021-08-26	negative	-
BD_0473	BD-A-0072 R	Oral swab	NAP buffer	2021-08-26	negative	-
BD_0987	BD-A-0072 R	Rectal swab	NAP buffer	2021-08-26	negative	-
BD_0471	BD-A-0073 R	Oral swab	NAP buffer	2021-08-26	negative	-
BD_0988	BD-A-0073 R	Rectal swab	NAP buffer	2021-08-26	negative	-
BD_0389	BD-A-0074 R	Oral swab	NAP buffer	2021-08-26	negative	-
BD_0989	BD-A-0074 R	Rectal swab	NAP buffer	2021-08-26	negative	-
BD_1183	BD-V-0014 R	Rectal swab	NAP buffer	2021-08-26	negative	-
BD_0557	BD-V-0015 R	Oral swab	NAP buffer	2021-08-26	negative	-
BD_1184	BD-V-0015 R	Rectal swab	NAP buffer	2021-08-26	negative	-
BD_0525	BD-V-0016 R	Oral swab	NAP buffer	2021-08-26	negative	-
BD_1185	BD-V-0016 R	Rectal swab	NAP buffer	2021-08-26	negative	-
BD_0566	BD-V-0017 R	Oral swab	NAP buffer	2021-08-26	negative	-
BD_1186	BD-V-0017 R	Rectal swab	NAP buffer	2021-08-26	negative	-
BD_0417	BD-A-0075 R	Oral swab	NAP buffer	2021-08-27	negative	-
BD_0990	BD-A-0075 R	Rectal swab	NAP buffer	2021-08-27	negative	-
BD_0376	BD-A-0076 R	Oral swab	NAP buffer	2021-08-27	negative	-
BD_0991	BD-A-0076 R	Rectal swab	NAP buffer	2021-08-27	negative	-
BD_0554	BD-V-0018 R	Oral swab	NAP buffer	2021-08-27	negative	-
BD_1187	BD-V-0018 R	Rectal swab	NAP buffer	2021-08-27	negative	-
BD_0560	BD-V-0019 R	Oral swab	NAP buffer	2021-08-27	negative	-
BD_1188	BD-V-0019 R	Rectal swab	NAP buffer	2021-08-27	negative	-
BD_0526	BD-V-0020 R	Oral swab	NAP buffer	2021-08-27	negative	-
BD_1189	BD-V-0020 R	Rectal swab	NAP buffer	2021-08-27	negative	-
BD_0519	BD-V-0021 R	Oral swab	NAP buffer	2021-08-27	negative	-
BD_1190	BD-V-0021 R	Rectal swab	NAP buffer	2021-08-27	negative	-
BD_0558	BD-V-0022 R	Oral swab	NAP buffer	2021-08-27	negative	-
BD_1191	BD-V-0022 R	Rectal swab	NAP buffer	2021-08-27	negative	-
BD_0511	BD-V-0023 R	Oral swab	NAP buffer	2021-08-27	negative	-
BD_1192	BD-V-0023 R	Rectal swab	NAP buffer	2021-08-27	negative	-
BD_0518	BD-V-0024 R	Oral swab	NAP buffer	2021-08-27	negative	-
BD_1193	BD-V-0024 R	Rectal swab	NAP buffer	2021-08-27	negative	-
BD_0570	BD-V-0025 R	Oral swab	NAP buffer	2021-08-27	negative	-
BD_1194	BD-V-0025 R	Rectal swab	NAP buffer	2021-08-27	negative	-
BD_0531	BD-V-0026 R	Oral swab	NAP buffer	2021-08-27	negative	-
BD_1195	BD-V-0026 R	Rectal swab	NAP buffer	2021-08-27	negative	-
BD_0567	BD-V-0027 R	Oral swab	NAP buffer	2021-08-27	negative	-
BD_1196	BD-V-0027 R	Rectal swab	NAP buffer	2021-08-27	negative	-
BD_0533	BD-V-0028 R	Oral swab	NAP buffer	2021-08-27	negative	-
BD_1197	BD-V-0028 R	Rectal swab	NAP buffer	2021-08-27	negative	-
BD_0424	BD-A-0077 R	Oral swab	NAP buffer	2021-08-28	negative	-
BD_0992	BD-A-0077 R	Rectal swab	NAP buffer	2021-08-28	negative	-
BD_0384	BD-A-0078 R	Oral swab	NAP buffer	2021-08-28	negative	-
BD_0993	BD-A-0078 R	Rectal swab	NAP buffer	2021-08-28	negative	-
BD_0438	BD-A-0079 R	Oral swab	NAP buffer	2021-08-28	negative	-
BD_0994	BD-A-0079 R	Rectal swab	NAP buffer	2021-08-28	negative	-
BD_0362	BD-B-Extras R	Oral swab	NAP buffer	2021-08-28	negative	-
BD_0362	BD-B-Extras R	Oral swab	NAP buffer	2021-08-28	negative	-
BD_1198	BD-V-0029 R	Rectal swab	NAP buffer	2021-08-28	negative	-
BD_0568	BD-V-0030 R	Oral swab	NAP buffer	2021-08-28	negative	-
BD_1199	BD-V-0030 R	Rectal swab	NAP buffer	2021-08-28	negative	-
BD_0435	BD-A-0080 R	Oral swab	NAP buffer	2021-08-29	negative	-
BD_0995	BD-A-0080 R	Rectal swab	NAP buffer	2021-08-29	negative	-
BD_0395	BD-A-0081 R	Oral swab	NAP buffer	2021-08-29	negative	-
BD_0996	BD-A-0081 R	Rectal swab	NAP buffer	2021-08-29	negative	-
BD_0453	BD-A-0082 R	Oral swab	NAP buffer	2021-08-29	negative	-
BD_0379	BD-A-0083 R	Oral swab	NAP buffer	2021-08-29	negative	-
BD_0404	BD-A-0084 R	Oral swab	NAP buffer	2021-08-29	negative	-
BD_0999	BD-A-0084 R	Rectal swab	NAP buffer	2021-08-29	negative	-
BD_0530	BD-V-0031 R	Oral swab	NAP buffer	2021-08-29	negative	-
BD_1200	BD-V-0031 R	Rectal swab	NAP buffer	2021-08-29	negative	-
BD_0549	BD-V-0032 R	Oral swab	NAP buffer	2021-08-29	negative	-
BD_1201	BD-V-0032 R	Rectal swab	NAP buffer	2021-08-29	negative	-
BD_0524	BD-V-0033 R	Oral swab	NAP buffer	2021-08-29	negative	-
BD_1202	BD-V-0033 R	Rectal swab	NAP buffer	2021-08-29	negative	-
BD_0516	BD-V-0034 R	Oral swab	NAP buffer	2021-08-29	negative	-
BD_1203	BD-V-0034 R	Rectal swab	NAP buffer	2021-08-29	negative	-
BD_0515	BD-V-0039 R	Oral swab	NAP buffer	2021-08-30	negative	-
BD_1208	BD-V-0039 R	Rectal swab	NAP buffer	2021-08-30	negative	-
BD_0565	BD-V-0040 R	Oral swab	NAP buffer	2021-08-30	negative	-
BD_1209	BD-V-0040 R	Rectal swab	NAP buffer	2021-08-30	negative	-
BD_0399	BD-A-0085 R	Oral swab	NAP buffer	2021-08-30	negative	-
BD_1000	BD-A-0085 R	Rectal swab	NAP buffer	2021-08-30	negative	-
BD_0539	BD-V-0035 R	Oral swab	NAP buffer	2021-08-30	negative	-
BD_1204	BD-V-0035 R	Rectal swab	NAP buffer	2021-08-30	negative	-
BD_0534	BD-V-0036 R	Oral swab	NAP buffer	2021-08-30	negative	-
BD_1205	BD-V-0036 R	Rectal swab	NAP buffer	2021-08-30	negative	-
BD_0550	BD-V-0037 R	Oral swab	NAP buffer	2021-08-30	negative	-
BD_1206	BD-V-0037 R	Rectal swab	NAP buffer	2021-08-30	negative	-
BD_0555	BD-V-0038 R	Oral swab	NAP buffer	2021-08-30	negative	-
BD_1207	BD-V-0038 R	Rectal swab	NAP buffer	2021-08-30	negative	-
BD_0418	BD-A-0086 R	Oral swab	NAP buffer	2021-08-31	negative	-
BD_1001	BD-A-0086 R	Rectal swab	NAP buffer	2021-08-31	negative	-
BD_0478	BD-A-0087 R	Oral swab	NAP buffer	2021-08-31	negative	-
BD_1002	BD-A-0087 R	Rectal swab	NAP buffer	2021-08-31	negative	-
BD_0390	BD-A-0088 R	Oral swab	NAP buffer	2021-08-31	negative	-
BD_0635	BD-A-0088 R	Liver	NAP buffer	2021-08-31	negative	-
BD_0706	BD-A-0088 R	Spleen	NAP buffer	2021-08-31	negative	-
BD_1003	BD-A-0088 R	Rectal swab	NAP buffer	2021-08-31	negative	-
BD_0873	BD-A-0088 R	Lung	NAP buffer	2021-08-31	negative	-
BD_0413	BD-A-0089 R	Oral swab	NAP buffer	2021-08-31	negative	-
BD_0634	BD-A-0089 R	Liver	NAP buffer	2021-08-31	negative	-
BD_0736	BD-A-0089 R	Spleen	NAP buffer	2021-08-31	negative	-
BD_1004	BD-A-0089 R	Rectal swab	NAP buffer	2021-08-31	negative	-
BD_0874	BD-A-0089 R	Lung	NAP buffer	2021-08-31	negative	-
BD_0523	BD-V-0041 R	Oral swab	NAP buffer	2021-08-31	negative	-
BD_1210	BD-V-0041 R	Rectal swab	NAP buffer	2021-08-31	negative	-
BD_0414	BD-A-0090 R	Oral swab	NAP buffer	2021-09-01	negative	-
BD_1005	BD-A-0090 R	Rectal swab	NAP buffer	2021-09-01	negative	-
BD_0416	BD-A-0091 R	Oral swab	NAP buffer	2021-09-01	negative	-
BD_1006	BD-A-0091 R	Rectal swab	NAP buffer	2021-09-01	negative	-
BD_0465	BD-A-0092 R	Oral swab	NAP buffer	2021-09-01	negative	-
BD_1007	BD-A-0092 R	Rectal swab	NAP buffer	2021-09-01	negative	-
BD_0544	BD-V-0043 R	Oral swab	NAP buffer	2021-09-01	negative	-
BD_1212	BD-V-0043 R	Rectal swab	NAP buffer	2021-09-01	negative	-
BD_0572	BD-V-0044 R	Oral swab	NAP buffer	2021-09-01	negative	-
BD_1213	BD-V-0044 R	Rectal swab	NAP buffer	2021-09-01	negative	-
BD_0517	BD-V-0045 R	Oral swab	NAP buffer	2021-09-01	negative	-
BD_1214	BD-V-0045 R	Rectal swab	NAP buffer	2021-09-01	negative	-
BD_0538	BD-V-0046 R	Oral swab	NAP buffer	2021-09-01	negative	-
BD_1215	BD-V-0046 R	Rectal swab	NAP buffer	2021-09-01	negative	-
BD_0547	BD-V-0047 R	Oral swab	NAP buffer	2021-09-01	negative	-
BD_1216	BD-V-0047 R	Rectal swab	NAP buffer	2021-09-01	negative	-
BD_0575	BD-V-0048 R	Oral swab	NAP buffer	2021-09-01	negative	-
BD_0575	BD-V-0048 R	Oral swab	NAP buffer	2021-09-01	negative	-
BD_1217	BD-V-0048 R	Rectal swab	NAP buffer	2021-09-01	negative	-
BD_0421	BD-A-0093 R	Oral swab	NAP buffer	2021-09-02	negative	-
BD_1008	BD-A-0093 R	Rectal swab	NAP buffer	2021-09-02	negative	-
BD_0380	BD-A-0094 R	Oral swab	NAP buffer	2021-09-02	negative	-
BD_1009	BD-A-0094 R	Rectal swab	NAP buffer	2021-09-02	negative	-
BD_0392	BD-A-0095 R	Oral swab	NAP buffer	2021-09-02	negative	-
BD_1010	BD-A-0095 R	Rectal swab	NAP buffer	2021-09-02	negative	-
BD_0455	BD-A-0096 R	Oral swab	NAP buffer	2021-09-02	negative	-
BD_1011	BD-A-0096 R	Rectal swab	NAP buffer	2021-09-02	negative	-
BD_0385	BD-A-0097 R	Oral swab	NAP buffer	2021-09-02	negative	-
BD_0665	BD-A-0097 R	Liver	NAP buffer	2021-09-02	negative	-
BD_0737	BD-A-0097 R	Spleen	NAP buffer	2021-09-02	negative	-
BD_1012	BD-A-0097 R	Rectal swab	NAP buffer	2021-09-02	negative	-
BD_0812	BD-A-0097 R	Lung	NAP buffer	2021-09-02	negative	-
BD_0540	BD-V-0049 R	Oral swab	NAP buffer	2021-09-02	negative	-
BD_0540	BD-V-0049 R	Oral swab	NAP buffer	2021-09-02	negative	-
BD_1218	BD-V-0049 R	Rectal swab	NAP buffer	2021-09-02	negative	-
BD_0551	BD-V-0050 R	Oral swab	NAP buffer	2021-09-02	negative	-
BD_1219	BD-V-0050 R	Rectal swab	NAP buffer	2021-09-02	negative	-
BD_0528	BD-V-0051 R	Oral swab	NAP buffer	2021-09-02	negative	-
BD_1220	BD-V-0051 R	Rectal swab	NAP buffer	2021-09-02	negative	-
BD_0537	BD-V-0052 R	Oral swab	NAP buffer	2021-09-02	negative	-
BD_1221	BD-V-0052 R	Rectal swab	NAP buffer	2021-09-02	negative	-
BD_0532	BD-V-0053 R	Oral swab	NAP buffer	2021-09-02	negative	-
BD_1222	BD-V-0053 R	Rectal swab	NAP buffer	2021-09-02	negative	-
BD_0461	BD-V-0054 R	Oral swab	NAP buffer	2021-09-02	negative	-
BD_1223	BD-V-0054 R	Rectal swab	NAP buffer	2021-09-02	negative	-
BD_0393	BD-A-0098 R	Oral swab	NAP buffer	2021-09-03	negative	-
BD_1013	BD-A-0098 R	Rectal swab	NAP buffer	2021-09-03	negative	-
BD_0400	BD-A-0099 R	Oral swab	NAP buffer	2021-09-03	negative	-
BD_1014	BD-A-0099 R	Rectal swab	NAP buffer	2021-09-03	negative	-
BD_0456	BD-A-0100 R	Oral swab	NAP buffer	2021-09-03	negative	-
BD_1015	BD-A-0100 R	Rectal swab	NAP buffer	2021-09-03	negative	-
BD_0419	BD-A-0101 R	Oral swab	NAP buffer	2021-09-03	negative	-
BD_1016	BD-A-0101 R	Rectal swab	NAP buffer	2021-09-03	negative	-
BD_0512	BD-V-0055 R	Oral swab	NAP buffer	2021-09-03	negative	-
BD_1224	BD-V-0055 R	Lung	NAP buffer	2021-09-03	negative	-
BD_0521	BD-V-0056 R	Oral swab	NAP buffer	2021-09-03	negative	-
BD_1225	BD-V-0056 R	Lung	NAP buffer	2021-09-03	negative	-
BD_1226	BD-V-0057 R	Lung	NAP buffer	2021-09-03	negative	-
BD_0561	BD-V-0058 R	Oral swab	NAP buffer	2021-09-03	negative	-
BD_1227	BD-V-0058 R	Lung	NAP buffer	2021-09-03	negative	-
BD_1228	BD-V-0059 R	Lung	NAP buffer	2021-09-03	negative	-
BD_0577	BD-V-0060 R	Oral swab	NAP buffer	2021-09-03	negative	-
BD_1229	BD-V-0060 R	Lung	NAP buffer	2021-09-03	negative	-
BD_0522	BD-V-0061 R	Oral swab	NAP buffer	2021-09-03	negative	-
BD_1230	BD-V-0061 R	Lung	NAP buffer	2021-09-03	negative	-
BD_1231	BD-V-0062 R	Lung	NAP buffer	2021-09-03	negative	-
BD_0564	BD-V-0063 R	Oral swab	NAP buffer	2021-09-03	negative	-
BD_1232	BD-V-0063 R	Lung	NAP buffer	2021-09-03	negative	-
BD_1233	BD-V-0064 R	Lung	NAP buffer	2021-09-03	negative	-
BD_0381	BD-A-0102 R	Oral swab	NAP buffer	2021-09-04	negative	-
BD_0527	BD-V-0065 R	Oral swab	NAP buffer	2021-09-04	negative	-
BD_1234	BD-V-0065 R	Lung	NAP buffer	2021-09-04	negative	-
BD_0545	BD-V-0066 R	Oral swab	NAP buffer	2021-09-04	negative	-
BD_1235	BD-V-0066 R	Lung	NAP buffer	2021-09-04	negative	-
BD_0514	BD-V-0067 R	Oral swab	NAP buffer	2021-09-04	negative	-
BD_1236	BD-V-0067 R	Lung	NAP buffer	2021-09-04	negative	-
BD_0396	BD-A-0103 R	Oral swab	NAP buffer	2021-09-05	negative	-
BD_0402	BD-A-0104 R	Oral swab	NAP buffer	2021-09-05	negative	-
BD_1019	BD-A-0104 R	Rectal swab	NAP buffer	2021-09-05	negative	-
BD_1020	BD-A-0105 R	Rectal swab	NAP buffer	2021-09-05	negative	-
BD_0398	BD-A-0106 R	Oral swab	NAP buffer	2021-09-05	negative	-
BD_0671	BD-A-0106 R	Liver	NAP buffer	2021-09-05	negative	-
BD_0707	BD-A-0106 R	Spleen	NAP buffer	2021-09-05	negative	-
BD_1021	BD-A-0106 R	Rectal swab	NAP buffer	2021-09-05	negative	-
BD_0825	BD-A-0106 R	Lung	NAP buffer	2021-09-05	negative	-
BD_0908	BD-A-0106 R	Lung	NAP buffer	2021-09-05	negative	-
BD_0553	BD-V-0068 R	Oral swab	NAP buffer	2021-09-05	negative	-
BD_1237	BD-V-0068 R	Lung	NAP buffer	2021-09-05	negative	-
BD_0576	BD-V-0069 R	Oral swab	NAP buffer	2021-09-05	negative	-
BD_0576	BD-V-0069 R	Oral swab	NAP buffer	2021-09-05	negative	-
BD_1238	BD-V-0069 R	Lung	NAP buffer	2021-09-05	negative	-
BD_0574	BD-V-0070 R	Oral swab	NAP buffer	2021-09-06	negative	-
BD_0569	BD-V-0071 R	Oral swab	NAP buffer	2021-09-06	negative	-
BD_0541	BD-V-0072 R	Oral swab	NAP buffer	2021-09-06	negative	-
BD_0562	BD-V-0073 R	Oral swab	NAP buffer	2021-09-06	negative	-
BD_0559	BD-V-0074 R	Oral swab	NAP buffer	2021-09-07	negative	-
BD2_1150	BD2-V-001 R	Oral swab	NAP buffer	2022-04-18	negative	-
BD2_1151	BD2-V-002 R	Oral swab	NAP buffer	2022-04-18	negative	-
BD2_1152	BD2-V-003 R	Oral swab	NAP buffer	2022-04-18	negative	-
BD2_1153	BD2-V-004 R	Oral swab	NAP buffer	2022-04-18	negative	-
BD2_1009	BD2-A-001 R	Oral swab	NAP buffer	2022-04-19	negative	-
BD2_1010	BD2-A-002 R	Oral swab	NAP buffer	2022-04-19	negative	-
BD2_0005	BD2-A-002-R	Lung	NAP buffer	2022-04-19	negative	-
BD2_0006	BD2-A-002-R	Spleen	NAP buffer	2022-04-19	negative	-
BD2_0004	BD2-A-002-R	Liver	NAP buffer	2022-04-19	negative	-
BD2_1011	BD2-A-003 R	Oral swab	NAP buffer	2022-04-19	negative	-
BD2_1154	BD2-V-005 R	Oral swab	NAP buffer	2022-04-19	negative	-
BD2_1155	BD2-V-006 R	Oral swab	NAP buffer	2022-04-19	negative	-
BD2_1156	BD2-V-007 R	Oral swab	NAP buffer	2022-04-19	negative	-
BD2_1157	BD2-V-008 R	Oral swab	NAP buffer	2022-04-19	negative	-
BD2_0002	BD2-V-008-R	Lung	NAP buffer	2022-04-19	negative	-
BD2_0003	BD2-V-008-R	Spleen	NAP buffer	2022-04-19	negative	-
BD2_0001	BD2-V-008-R	Liver	NAP buffer	2022-04-19	negative	-
BD2_1012	BD2-A-004 R	Oral swab	NAP buffer	2022-04-20	negative	-
BD2_0008	BD2-A-004-R	Lung	NAP buffer	2022-04-20	negative	-
BD2_0009	BD2-A-004-R	Spleen	NAP buffer	2022-04-20	negative	-
BD2_0007	BD2-A-004-R	Liver	NAP buffer	2022-04-20	negative	-
BD2_1013	BD2-A-005 R	Oral swab	NAP buffer	2022-04-20	negative	-
BD2_1014	BD2-A-006 R	Oral swab	NAP buffer	2022-04-20	negative	-
BD2_1015	BD2-A-007 R	Oral swab	NAP buffer	2022-04-20	negative	-
BD2_1016	BD2-A-008 R	Oral swab	NAP buffer	2022-04-20	negative	-
BD2_1158	BD2-V-009 R	Oral swab	NAP buffer	2022-04-20	negative	-
BD2_0012	BD2-V-009-R	Lung	NAP buffer	2022-04-20	negative	-
BD2_0013	BD2-V-009-R	Spleen	NAP buffer	2022-04-20	negative	-
BD2_0011	BD2-V-009-R	Liver	NAP buffer	2022-04-20	negative	-
BD2_1159	BD2-V-010 R	Oral swab	NAP buffer	2022-04-20	negative	-
BD2_1160	BD2-V-011 R	Oral swab	NAP buffer	2022-04-20	negative	-
BD2_1017	BD2-A-009 R	Oral swab	NAP buffer	2022-04-21	negative	-
BD2_1018	BD2-A-010 R	Oral swab	NAP buffer	2022-04-21	negative	-
BD2_1019	BD2-A-011 R	Oral swab	NAP buffer	2022-04-21	negative	-
BD2_1020	BD2-A-012 R	Oral swab	NAP buffer	2022-04-21	negative	-
BD2_1021	BD2-A-013 R	Oral swab	NAP buffer	2022-04-21	negative	-
BD2_1161	BD2-V-012 R	Oral swab	NAP buffer	2022-04-21	negative	-
BD2_1162	BD2-V-013 R	Oral swab	NAP buffer	2022-04-21	negative	-
BD2_1163	BD2-V-014 R	Oral swab	NAP buffer	2022-04-21	negative	-
BD2_1164	BD2-V-015 R	Oral swab	NAP buffer	2022-04-21	negative	-
BD2_1165	BD2-V-016 R	Oral swab	NAP buffer	2022-04-21	negative	-
BD2_1022	BD2-A-014 R	Oral swab	NAP buffer	2022-04-22	negative	-
BD2_1023	BD2-A-015 R	Oral swab	NAP buffer	2022-04-22	negative	-
BD2_1024	BD2-A-016 R	Oral swab	NAP buffer	2022-04-22	negative	-
BD2_1025	BD2-A-017 R	Oral swab	NAP buffer	2022-04-22	negative	-
BD2_1026	BD2-A-018 R	Oral swab	NAP buffer	2022-04-22	negative	-
BD2_1027	BD2-A-019 R	Oral swab	NAP buffer	2022-04-22	negative	-
BD2_1028	BD2-A-020 R	Oral swab	NAP buffer	2022-04-22	negative	-
BD2_1029	BD2-A-021 R	Oral swab	NAP buffer	2022-04-22	negative	-
BD2_1030	BD2-A-022 R	Oral swab	NAP buffer	2022-04-22	negative	-
BD2_1031	BD2-A-023 R	Oral swab	NAP buffer	2022-04-22	negative	-
BD2_1032	BD2-A-024 R	Oral swab	NAP buffer	2022-04-22	negative	-
BD2_1033	BD2-A-025 R	Oral swab	NAP buffer	2022-04-22	negative	-
BD2_1034	BD2-A-026 R	Oral swab	NAP buffer	2022-04-22	negative	-
BD2_1166	BD2-V-017 R	Oral swab	NAP buffer	2022-04-22	negative	-
BD2_1167	BD2-V-018 R	Oral swab	NAP buffer	2022-04-22	negative	-
BD2_1168	BD2-V-019 R	Oral swab	NAP buffer	2022-04-22	negative	-
BD2_1169	BD2-V-020 R	Oral swab	NAP buffer	2022-04-22	negative	-
BD2_1035	BD2-A-027 R	Oral swab	NAP buffer	2022-04-23	negative	-
BD2_1036	BD2-A-028 R	Oral swab	NAP buffer	2022-04-23	negative	-
BD2_1037	BD2-A-029 R	Oral swab	NAP buffer	2022-04-23	negative	-
BD2_1170	BD2-V-021 R	Oral swab	NAP buffer	2022-04-23	negative	-
BD2_1171	BD2-V-022 R	Oral swab	NAP buffer	2022-04-23	negative	-
BD2_1172	BD2-V-023 R	Oral swab	NAP buffer	2022-04-23	negative	-
BD2_1173	BD2-V-024 R	Oral swab	NAP buffer	2022-04-23	negative	-
BD2_1174	BD2-V-025 R	Oral swab	NAP buffer	2022-04-23	negative	-
BD2_1175	BD2-V-026 R	Oral swab	NAP buffer	2022-04-24	negative	-
BD2_1176	BD2-V-027 R	Oral swab	NAP buffer	2022-04-24	negative	-
BD2_1177	BD2-V-028 R	Oral swab	NAP buffer	2022-04-24	negative	-
BD2_1178	BD2-V-029 R	Oral swab	NAP buffer	2022-04-24	negative	-
BD2_1038	BD2-A-030 R	Oral swab	NAP buffer	2022-04-25	negative	-
BD2_1039	BD2-A-031 R	Oral swab	NAP buffer	2022-04-25	negative	-
BD2_1040	BD2-A-032 R	Oral swab	NAP buffer	2022-04-25	negative	-
BD2_1041	BD2-A-033 R	Oral swab	NAP buffer	2022-04-25	negative	-
BD2_1042	BD2-A-034 R	Oral swab	NAP buffer	2022-04-25	negative	-
BD2_1043	BD2-A-035 R	Oral swab	NAP buffer	2022-04-25	negative	-
BD2_1044	BD2-A-036 R	Oral swab	NAP buffer	2022-04-25	negative	-
BD2_1045	BD2-A-037 R	Oral swab	NAP buffer	2022-04-25	negative	-
BD2_1046	BD2-A-038 R	Oral swab	NAP buffer	2022-04-25	negative	-
BD2_1179	BD2-V-030 R	Oral swab	NAP buffer	2022-04-25	negative	-
BD2_1047	BD2-A-039 R	Oral swab	NAP buffer	2022-04-26	negative	-
BD2_1048	BD2-A-040 R	Oral swab	NAP buffer	2022-04-26	negative	-
BD2_1049	BD2-A-041 R	Oral swab	NAP buffer	2022-04-26	negative	-
BD2_1050	BD2-A-042 R	Oral swab	NAP buffer	2022-04-26	negative	-
BD2_1051	BD2-A-043 R	Oral swab	NAP buffer	2022-04-26	negative	-
BD2_1052	BD2-A-044 R	Oral swab	NAP buffer	2022-04-26	negative	-
BD2_1180	BD2-V-031 R	Oral swab	NAP buffer	2022-04-26	negative	-
BD2_1181	BD2-V-032 R	Oral swab	NAP buffer	2022-04-26	negative	-
BD2_1182	BD2-V-033 R	Oral swab	NAP buffer	2022-04-26	negative	-
BD2_1053	BD2-A-045 R	Oral swab	NAP buffer	2022-04-27	negative	-
BD2_1054	BD2-A-046 R	Oral swab	NAP buffer	2022-04-27	negative	-
BD2_1055	BD2-A-047 R	Oral swab	NAP buffer	2022-04-27	negative	-
BD2_1056	BD2-A-048 R	Oral swab	NAP buffer	2022-04-27	negative	-
BD2_1057	BD2-A-049 R	Oral swab	NAP buffer	2022-04-27	negative	-
BD2_1183	BD2-V-034 R	Oral swab	NAP buffer	2022-04-27	negative	-
BD2_1184	BD2-V-035 R	Oral swab	NAP buffer	2022-04-27	negative	-
BD2_1058	BD2-A-050 R	Oral swab	NAP buffer	2022-04-28	negative	-
BD2_0015	BD2-A-051 R	Lung	NAP buffer	2022-04-28	negative	-
BD2_0016	BD2-A-051 R	Spleen	NAP buffer	2022-04-28	negative	-
BD2_1059	BD2-A-051 R	Oral swab	NAP buffer	2022-04-28	negative	-
BD2_0014	BD2-A-051 R	Liver	NAP buffer	2022-04-28	negative	-
BD2_1060	BD2-A-052 R	Oral swab	NAP buffer	2022-04-28	negative	-
BD2_1061	BD2-A-053 R	Oral swab	NAP buffer	2022-04-28	negative	-
BD2_1062	BD2-A-054 R	Oral swab	NAP buffer	2022-04-28	negative	-
BD2_1063	BD2-A-055 R	Oral swab	NAP buffer	2022-04-28	negative	-
BD2_1185	BD2-V-036 R	Oral swab	NAP buffer	2022-04-28	negative	-
BD2_1186	BD2-V-037 R	Oral swab	NAP buffer	2022-04-28	negative	-
BD2_1187	BD2-V-038 R	Oral swab	NAP buffer	2022-04-28	negative	-
BD2_1188	BD2-V-039 R	Oral swab	NAP buffer	2022-04-28	negative	-
BD2_1189	BD2-V-040 R	Oral swab	NAP buffer	2022-04-28	negative	-
BD2_1064	BD2-A-056 R	Oral swab	NAP buffer	2022-04-29	negative	-
BD2_1065	BD2-A-057 R	Oral swab	NAP buffer	2022-04-29	negative	-
BD2_1066	BD2-A-058 R	Oral swab	NAP buffer	2022-04-29	negative	-
BD2_1190	BD2-V-041 R	Oral swab	NAP buffer	2022-04-29	negative	-
BD2_1191	BD2-V-042 R	Oral swab	NAP buffer	2022-04-29	negative	-
BD2_1192	BD2-V-043 R	Oral swab	NAP buffer	2022-04-29	negative	-
BD2_1193	BD2-V-044 R	Oral swab	NAP buffer	2022-04-29	negative	-
BD2_1194	BD2-V-045 R	Oral swab	NAP buffer	2022-04-29	negative	-
BD2_1195	BD2-V-046 R	Oral swab	NAP buffer	2022-04-30	negative	-
BD2_1196	BD2-V-047 R	Oral swab	NAP buffer	2022-04-30	negative	-
BD2_1197	BD2-V-048 R	Oral swab	NAP buffer	2022-04-30	negative	-
BD2_1067	BD2-A-059 R	Oral swab	NAP buffer	2022-05-01	negative	-
BD2_1068	BD2-A-060 R	Oral swab	NAP buffer	2022-05-01	negative	-
BD2_1069	BD2-A-061 R	Oral swab	NAP buffer	2022-05-01	negative	-
BD2_1070	BD2-A-062 R	Oral swab	NAP buffer	2022-05-01	negative	-
BD2_1198	BD2-V-049 R	Oral swab	NAP buffer	2022-05-01	negative	-
BD2_1071	BD2-A-063 R	Oral swab	NAP buffer	2022-05-03	negative	-
BD2_0018	BD2-A-064 R	Lung	NAP buffer	2022-05-03	negative	-
BD2_0019	BD2-A-064 R	Spleen	NAP buffer	2022-05-03	negative	-
BD2_1072	BD2-A-064 R	Oral swab	NAP buffer	2022-05-03	negative	-
BD2_0017	BD2-A-064 R	Liver	NAP buffer	2022-05-03	negative	-
BD2_1073	BD2-A-065 R	Oral swab	NAP buffer	2022-05-03	negative	-
BD2_1074	BD2-A-066 R	Oral swab	NAP buffer	2022-05-03	negative	-
BD2_1075	BD2-A-067 R	Oral swab	NAP buffer	2022-05-03	negative	-
BD2_1199	BD2-V-050 R	Oral swab	NAP buffer	2022-05-03	negative	-
BD2_1200	BD2-V-051 R	Oral swab	NAP buffer	2022-05-03	negative	-
BD2_1201	BD2-V-052 R	Oral swab	NAP buffer	2022-05-03	negative	-
BD2_1076	BD2-A-068 R	Oral swab	NAP buffer	2022-05-04	negative	-
BD2_1077	BD2-A-069 R	Oral swab	NAP buffer	2022-05-04	negative	-
BD2_1078	BD2-A-070 R	Oral swab	NAP buffer	2022-05-04	negative	-
BD2_1202	BD2-V-053 R	Oral swab	NAP buffer	2022-05-04	negative	-
BD2_1079	BD2-A-071 R	Oral swab	NAP buffer	2022-05-05	negative	-
BD2_1080	BD2-A-072 R	Oral swab	NAP buffer	2022-05-05	negative	-
BD2_1081	BD2-A-073 R	Oral swab	NAP buffer	2022-05-05	negative	-
BD2_1082	BD2-A-074 R	Oral swab	NAP buffer	2022-05-05	negative	-
BD2_1203	BD2-V-054 R	Oral swab	NAP buffer	2022-05-05	negative	-
BD2_1204	BD2-V-055 R	Oral swab	NAP buffer	2022-05-05	negative	-
BD2_1087	BD2-B-001 R	Oral swab	NAP buffer	2022-05-08	negative	-
BD2_1118	BD2-C-001 R	Oral swab	NAP buffer	2022-05-08	negative	-
BD2_1119	BD2-C-002 R	Oral swab	NAP buffer	2022-05-08	negative	-
BD2_1088	BD2-B-002 R	Oral swab	NAP buffer	2022-05-09	negative	-
BD2_1120	BD2-C-003 R	Oral swab	NAP buffer	2022-05-09	negative	-
BD2_1121	BD2-C-004 R	Oral swab	NAP buffer	2022-05-09	negative	-
BD2_1122	BD2-C-005 R	Oral swab	NAP buffer	2022-05-09	negative	-
BD2_1123	BD2-C-006 R	Oral swab	NAP buffer	2022-05-09	negative	-
BD2_1089	BD2-B-003 R	Oral swab	NAP buffer	2022-05-10	negative	-
BD2_1090	BD2-B-004 R	Oral swab	NAP buffer	2022-05-10	negative	-
BD2_1091	BD2-B-005 R	Oral swab	NAP buffer	2022-05-10	negative	-
BD2_1124	BD2-C-007 R	Oral swab	NAP buffer	2022-05-10	negative	-
BD2_1125	BD2-C-008 R	Oral swab	NAP buffer	2022-05-10	negative	-
BD2_1126	BD2-C-009 R	Oral swab	NAP buffer	2022-05-11	negative	-
BD2_1127	BD2-C-010 R	Oral swab	NAP buffer	2022-05-12	negative	-
BD2_1092	BD2-B-006 R	Oral swab	NAP buffer	2022-05-13	negative	-
BD2_1093	BD2-B-007 R	Oral swab	NAP buffer	2022-05-13	negative	-
BD2_1094	BD2-B-008 R	Oral swab	NAP buffer	2022-05-13	negative	-
BD2_1128	BD2-C-011 R	Oral swab	NAP buffer	2022-05-13	negative	-
BD2_1129	BD2-C-012 R	Oral swab	NAP buffer	2022-05-13	negative	-
BD2_1095	BD2-B-009 R	Oral swab	NAP buffer	2022-05-14	negative	-
BD2_1130	BD2-C-013 R	Oral swab	NAP buffer	2022-05-14	negative	-
BD2_1096	BD2-B-010 R	Oral swab	NAP buffer	2022-05-15	negative	-
BD2_1097	BD2-B-011 R	Oral swab	NAP buffer	2022-05-15	negative	-
BD2_1098	BD2-B-012 R	Oral swab	NAP buffer	2022-05-15	negative	-
BD2_1131	BD2-C-014 R	Oral swab	NAP buffer	2022-05-15	negative	-
BD2_1149	BD2-C-EXT R	Oral swab	NAP buffer	2022-05-15	negative	-
BD2_1099	BD2-B-013 R	Oral swab	NAP buffer	2022-05-16	negative	-
BD2_1100	BD2-B-014 R	Oral swab	NAP buffer	2022-05-16	negative	-
BD2_1101	BD2-B-015 R	Oral swab	NAP buffer	2022-05-17	negative	-
BD2_1102	BD2-B-016 R	Oral swab	NAP buffer	2022-05-17	negative	-
BD2_1103	BD2-B-017 R	Oral swab	NAP buffer	2022-05-17	negative	-
BD2_1132	BD2-C-015 R	Oral swab	NAP buffer	2022-05-17	negative	-
BD2_1133	BD2-C-016 R	Oral swab	NAP buffer	2022-05-17	negative	-
BD2_1104	BD2-B-018 R	Oral swab	NAP buffer	2022-05-18	negative	-
BD2_1105	BD2-B-019 R	Oral swab	NAP buffer	2022-05-18	negative	-
BD2_1106	BD2-B-020 R	Oral swab	NAP buffer	2022-05-18	negative	-
BD2_1134	BD2-C-017 R	Oral swab	NAP buffer	2022-05-18	negative	-
BD2_1135	BD2-C-018 R	Oral swab	NAP buffer	2022-05-18	negative	-
BD2_1137	BD2-C-019 R	Oral swab	NAP buffer	2022-05-19	negative	-
BD2_1107	BD2-B-021 R	Oral swab	NAP buffer	2022-05-20	negative	-
BD2_1108	BD2-B-022 R	Oral swab	NAP buffer	2022-05-20	negative	-
BD2_1109	BD2-B-023 R	Oral swab	NAP buffer	2022-05-21	negative	-
BD2_1110	BD2-B-024 R	Oral swab	NAP buffer	2022-05-21	negative	-
BD2_0025	BD2-C-021 R	Lung	NAP buffer	2022-05-21	negative	-
BD2_0026	BD2-C-021 R	Spleen	NAP buffer	2022-05-21	negative	-
BD2_1139	BD2-C-021 R	Oral swab	NAP buffer	2022-05-21	negative	-
BD2_0024	BD2-C-021 R	Liver	NAP buffer	2022-05-21	negative	-
BD2_1140	BD2-C-022 R	Oral swab	NAP buffer	2022-05-21	negative	-
BD2_1141	BD2-C-023 R	Oral swab	NAP buffer	2022-05-21	negative	-
BD2_1142	BD2-C-024 R	Oral swab	NAP buffer	2022-05-21	negative	-
BD2_1143	BD2-C-025 R	Oral swab	NAP buffer	2022-05-21	negative	-
BD2_1144	BD2-C-026 R	Oral swab	NAP buffer	2022-05-21	negative	-
BD2_1111	BD2-B-025 R	Oral swab	NAP buffer	2022-05-22	negative	-
BD2_1898	BD2-B-026 R	Oral swab	NAP buffer	2022-05-22	negative	-
BD2_1112	BD2-B-027 R	Oral swab	NAP buffer	2022-05-23	negative	-
BD2_0022	BD2-B-028 R	Lung	NAP buffer	2022-05-23	negative	-
BD2_0023	BD2-B-028 R	Spleen	NAP buffer	2022-05-23	negative	-
BD2_1113	BD2-B-028 R	Oral swab	NAP buffer	2022-05-23	negative	-
BD2_0021	BD2-B-028 R	Liver	NAP buffer	2022-05-23	negative	-
BD2_1145	BD2-C-027 R	Oral swab	NAP buffer	2022-05-23	negative	-
BD2_1114	BD2-B-029 R	Oral swab	NAP buffer	2022-05-24	negative	-
BD2_0028	BD2-C-028 R	Lung	NAP buffer	2022-05-24	negative	-
BD2_0029	BD2-C-028 R	Spleen	NAP buffer	2022-05-24	negative	-
BD2_1146	BD2-C-028 R	Oral swab	NAP buffer	2022-05-24	negative	-
BD2_0027	BD2-C-028 R	Liver	NAP buffer	2022-05-24	negative	-
BD2_1147	BD2-C-029 R	Oral swab	NAP buffer	2022-05-24	negative	-
BD2_1148	BD2-C-030 R	Oral swab	NAP buffer	2022-05-24	negative	-
BD2_1115	BD2-B-030 R	Oral swab	NAP buffer	2022-05-25	negative	-
BD2_1116	BD2-B-031 R	Oral swab	NAP buffer	2022-05-25	negative	-
BD2_1117	BD2-B-032 R	Oral swab	NAP buffer	2022-05-25	negative	-
BD2_1138	BD2-C-020 R	Oral swab	NAP buffer	XX.05.2022	negative	-
Extract IDs which are listed twice indicate that the corresponding samples were extracted and tested twice

## Sheet: Supp. Table 4- Rodents Mgb area
Supplementary Table 4 - Molecular Detection of OPV DNA in different tissues of rodents collected around the Audrenisrou group area
Extract ID	Individual	Common name (phenotypical ID)	Species name (Phenotypical ID)	Sample type	Storage medium	Collection date	OPV PCR	OPV Copies/5µL
TR_e_0060	TR-0001	-	-	Tail	NAP buffer	2021-07-07	negative	-
TR_e_0143	TR-0001	-	-	Oral swab	None	2021-07-07	negative	-
TR_e_0311	TR-0001	-	-	Rectal swab	None	2021-07-07	negative	-
TR_e_0144	TR-0002	Emin's giant pouched rat	Cricetomys emini	Oral swab	NAP buffer	2021-08-12	negative	-
TR_e_0312	TR-0002	Emin's giant pouched rat	Cricetomys emini	Rectal swab	NAP buffer	2021-08-12	negative	-
TR_e_0145	TR-0003	Emin's giant pouched rat	Cricetomys emini	Oral swab	NAP buffer	2021-08-20	negative	-
TR_e_0313	TR-0003	Emin's giant pouched rat	Cricetomys emini	Rectal swab	NAP buffer	2021-08-20	negative	-
TR_e_0001	TR-0004	Emin's giant pouched rat	Cricetomys emini	Faeces	NAP buffer	2021-08-20	negative	-
TR_e_0146	TR-0004	Emin's giant pouched rat	Cricetomys emini	Oral swab	NAP buffer	2021-08-20	negative	-
TR_e_0314	TR-0004	Emin's giant pouched rat	Cricetomys emini	Rectal swab	NAP buffer	2021-08-20	negative	-
TR_e_0147	TR-0005	-	-	Oral swab	NAP buffer	2021-08-21	negative	-
TR_e_0315	TR-0005	-	-	Rectal swab	NAP buffer	2021-08-21	negative	-
TR_e_0002	TR-0006	-	-	Faeces	NAP buffer	2021-08-21	negative	-
TR_e_0148	TR-0006	-	-	Oral swab	NAP buffer	2021-08-21	negative	-
TR_e_0316	TR-0006	-	-	Rectal swab	NAP buffer	2021-08-21	negative	-
TR_e_0003	TR-0007	-	-	Faeces	NAP buffer	2021-08-26	negative	-
TR_e_0149	TR-0007	-	-	Oral swab	NAP buffer	2021-08-26	negative	-
TR_e_0317	TR-0007	-	-	Rectal swab	NAP buffer	2021-08-26	negative	-
TR_e_0004	TR-0008	-	-	Faeces	NAP buffer	2021-08-27	negative	-
TR_e_0150	TR-0008	-	-	Oral swab	NAP buffer	2021-08-27	negative	-
TR_e_0318	TR-0008	-	-	Rectal swab	NAP buffer	2021-08-27	negative	-
TR_e_0005	TR-0009	-	-	Faeces	NAP buffer	2021-08-29	negative	-
TR_e_0006	TR-0009	-	-	Faeces	None	2021-08-29	negative	-
TR_e_0151	TR-0009	-	-	Oral swab	NAP buffer	2021-08-29	negative	-
TR_e_0319	TR-0009	-	-	Rectal swab	NAP buffer	2021-08-29	negative	-
TR_e_0007	TR-0010	-	-	Faeces	NAP buffer	2021-08-29	negative	-
TR_e_0008	TR-0010	-	-	Faeces	None	2021-08-29	negative	-
TR_e_0152	TR-0010	-	-	Oral swab	NAP buffer	2021-08-29	negative	-
TR_e_0320	TR-0010	-	-	Rectal swab	NAP buffer	2021-08-29	negative	-
TR_e_0009	TR-0011	-	-	Faeces	NAP buffer	2021-08-30	negative	-
TR_e_0153	TR-0011	-	-	Oral swab	NAP buffer	2021-08-30	negative	-
TR_e_0321	TR-0011	-	-	Rectal swab	NAP buffer	2021-08-30	negative	-
TR_e_0010	TR-0012	-	-	Faeces	NAP buffer	2021-08-30	negative	-
TR_e_0154	TR-0012	-	-	Oral swab	NAP buffer	2021-08-30	negative	-
TR_e_0322	TR-0012	-	-	Rectal swab	NAP buffer	2021-08-30	negative	-
TR_e_0011	TR-0013	-	-	Faeces	NAP buffer	2021-08-30	negative	-
TR_e_0155	TR-0013	-	-	Oral swab	NAP buffer	2021-08-30	negative	-
TR_e_0323	TR-0013	-	-	Rectal swab	NAP buffer	2021-08-30	negative	-
TR_e_0012	TR-0014	-	-	Faeces	None	2021-08-31	negative	-
TR_e_0061	TR-0014	-	-	Liver	NAP buffer	2021-08-31	negative	-
TR_e_0062	TR-0014	-	-	Nose & tongue	NAP buffer	2021-08-31	negative	-
TR_e_0063	TR-0014	-	-	Spleen	NAP buffer	2021-08-31	negative	-
TR_e_0156	TR-0014	-	-	Oral swab	NAP buffer	2021-08-31	negative	-
TR_e_0324	TR-0014	-	-	Rectal swab	NAP buffer	2021-08-31	negative	-
TR_e_0013	TR-0015	-	-	Faeces	NAP buffer	2021-08-31	negative	-
TR_e_0014	TR-0015	-	-	Faeces	None	2021-08-31	negative	-
TR_e_0157	TR-0015	-	-	Oral swab	NAP buffer	2021-08-31	negative	-
TR_e_0325	TR-0015	-	-	Rectal swab	NAP buffer	2021-08-31	negative	-
TR_e_0015	TR-0016	-	-	Faeces	NAP buffer	2021-08-31	negative	-
TR_e_0016	TR-0016	-	-	Faeces	None	2021-08-31	negative	-
TR_e_0158	TR-0016	-	-	Oral swab	NAP buffer	2021-08-31	negative	-
TR_e_0326	TR-0016	-	-	Rectal swab	NAP buffer	2021-08-31	negative	-
TR_e_0017	TR-0017	-	-	Faeces	NAP buffer	2021-09-01	negative	-
TR_e_0159	TR-0017	-	-	Oral swab	NAP buffer	2021-09-01	negative	-
TR_e_0327	TR-0017	-	-	Rectal swab	NAP buffer	2021-09-01	negative	-
TR_e_0018	TR-0018	-	-	Faeces	NAP buffer	2021-09-01	negative	-
TR_e_0160	TR-0018	-	-	Oral swab	NAP buffer	2021-09-01	negative	-
TR_e_0328	TR-0018	-	-	Rectal swab	NAP buffer	2021-09-01	negative	-
TR_e_0019	TR-0019	-	-	Faeces	NAP buffer	2021-09-01	negative	-
TR_e_0161	TR-0019	-	-	Oral swab	NAP buffer	2021-09-01	negative	-
TR_e_0329	TR-0019	-	-	Rectal swab	NAP buffer	2021-09-01	negative	-
TR_e_0020	TR-0020	-	-	Faeces	NAP buffer	2021-09-03	negative	-
TR_e_0162	TR-0020	-	-	Oral swab	NAP buffer	2021-09-03	negative	-
TR_e_0330	TR-0020	-	-	Rectal swab	NAP buffer	2021-09-03	negative	-
TR_e_0021	TR-0021	-	-	Faeces	NAP buffer	2021-09-03	negative	-
TR_e_0022	TR-0021	-	-	Faeces	None	2021-09-03	negative	-
TR_e_0023	TR-0022	-	-	Faeces	NAP buffer	2021-09-03	negative	-
TR_e_0163	TR-0022	-	-	Oral swab	NAP buffer	2021-09-03	negative	-
TR_e_0024	TR-0023	-	-	Faeces	NAP buffer	2021-09-03	negative	-
TR_e_0164	TR-0023	-	-	Oral swab	NAP buffer	2021-09-03	negative	-
TR_e_0332	TR-0023	-	-	Rectal swab	NAP buffer	2021-09-03	negative	-
TR_e_0025	TR-0024	-	-	Faeces	None	2021-09-03	negative	-
TR_e_0026	TR-0024	-	-	Faeces	NAP buffer	2021-09-03	negative	-
TR_e_0165	TR-0024	-	-	Oral swab	NAP buffer	2021-09-03	negative	-
TR_e_0334	TR-0024	-	-	Rectal swab	NAP buffer	2021-09-03	negative	-
TR_e_0027	TR-0025	-	-	Faeces	NAP buffer	2021-09-03	negative	-
TR_e_0064	TR-0026	-	-	Lung & heart	None	2021-09-11	negative	-
TR_e_0095	TR-0026	-	-	Abdominal cavity swab	None	2021-09-11	negative	-
TR_e_0166	TR-0026	-	-	Oral swab	None	2021-09-11	negative	-
TR_e_0335	TR-0026	-	-	Rectal swab	None	2021-09-11	negative	-
TR_e_0065	TR-0027	-	-	Lung & heart	None	2021-09-11	negative	-
TR_e_0096	TR-0027	-	-	Abdominal cavity swab	None	2021-09-11	negative	-
TR_e_0167	TR-0027	-	-	Oral swab	None	2021-09-11	negative	-
TR_e_0336	TR-0027	-	-	Rectal swab	None	2021-09-11	negative	-
TR_e_0028	TR-0028	Emin's giant pouched rat	Cricetomys emini	Faeces	NAP buffer	2021-09-13	negative	-
TR_e_0168	TR-0028	Emin's giant pouched rat	Cricetomys emini	Oral swab	NAP buffer	2021-09-13	negative	-
TR_e_0337	TR-0028	Emin's giant pouched rat	Cricetomys emini	Rectal swab	NAP buffer	2021-09-13	negative	-
TR_e_0169	TR-0029	Emin's giant pouched rat	Cricetomys emini	Oral swab	NAP buffer	2021-09-13	negative	-
TR_e_0338	TR-0029	Emin's giant pouched rat	Cricetomys emini	Rectal swab	NAP buffer	2021-09-13	negative	-
TR_e_0170	TR-0030	-	-	Oral swab	NAP buffer	2021-09-13	negative	-
TR_e_0339	TR-0030	-	-	Rectal swab	NAP buffer	2021-09-13	negative	-
TR_e_0029	TR-0031	-	-	Faeces	None	2021-09-13	negative	-
TR_e_0171	TR-0031	-	-	Oral swab	NAP buffer	2021-09-13	negative	-
TR_e_0340	TR-0031	-	-	Rectal swab	NAP buffer	2021-09-13	negative	-
TR_e_0172	TR-0032	Emin's giant pouched rat	Cricetomys emini	Oral swab	NAP buffer	2021-09-14	negative	-
TR_e_0341	TR-0032	Emin's giant pouched rat	Cricetomys emini	Rectal swab	NAP buffer	2021-09-14	negative	-
TR_e_0030	TR-0033	-	-	Faeces	NAP buffer	2021-09-14	negative	-
TR_e_0173	TR-0033	-	-	Oral swab	NAP buffer	2021-09-14	negative	-
TR_e_0342	TR-0033	-	-	Rectal swab	NAP buffer	2021-09-14	negative	-
TR_e_0031	TR-0034	-	-	Faeces	NAP buffer	2021-09-14	negative	-
TR_e_0174	TR-0034	-	-	Oral swab	NAP buffer	2021-09-14	negative	-
TR_e_0343	TR-0034	-	-	Rectal swab	NAP buffer	2021-09-14	negative	-
TR_e_0097	TR-0035	Emin's giant pouched rat	Cricetomys emini	Lesion hip swab	None	2021-09-17	negative	-
TR_e_0098	TR-0035	Emin's giant pouched rat	Cricetomys emini	Eczema right front leg swab	None	2021-09-17	negative	-
TR_e_0175	TR-0035	Emin's giant pouched rat	Cricetomys emini	Oral swab	NAP buffer	2021-09-17	negative	-
TR_e_0344	TR-0035	Emin's giant pouched rat	Cricetomys emini	Rectal swab	NAP buffer	2021-09-17	negative	-
TR_e_0176	TR-0036	Emin's giant pouched rat	Cricetomys emini	Oral swab	NAP buffer	2021-09-25	negative	-
TR_e_0345	TR-0036	Emin's giant pouched rat	Cricetomys emini	Rectal swab	NAP buffer	2021-09-25	negative	-
TR_e_0032	TR-0037	-	-	Faeces	NAP buffer	2021-09-25	negative	-
TR_e_0177	TR-0037	-	-	Oral swab	NAP buffer	2021-09-25	negative	-
TR_e_0346	TR-0037	-	-	Rectal swab	NAP buffer	2021-09-25	negative	-
TR_e_0033	TR-0038	-	-	Faeces	NAP buffer	2021-09-25	negative	-
TR_e_0178	TR-0038	-	-	Oral swab	NAP buffer	2021-09-25	negative	-
TR_e_0347	TR-0038	-	-	Rectal swab	NAP buffer	2021-09-25	negative	-
TR_e_0034	TR-0039	-	-	Faeces	NAP buffer	2021-09-26	negative	-
TR_e_0179	TR-0039	-	-	Oral swab	NAP buffer	2021-09-26	negative	-
TR_e_0348	TR-0039	-	-	Rectal swab	NAP buffer	2021-09-26	negative	-
TR_e_0066	TR-0040	-	-	Liver	None	2021-09-26	negative	-
TR_e_0067	TR-0040	-	-	Nose & tongue	None	2021-09-26	negative	-
TR_e_0068	TR-0040	-	-	Spleen	None	2021-09-26	negative	-
TR_e_0035	TR-0041	-	-	Faeces	NAP buffer	2021-09-26	negative	-
TR_e_0180	TR-0041	-	-	Oral swab	NAP buffer	2021-09-26	negative	-
TR_e_0349	TR-0041	-	-	Rectal swab	NAP buffer	2021-09-26	negative	-
TR_e_0181	TR-0042	Emin's giant pouched rat	Cricetomys emini	Oral swab	NAP buffer	2021-10-05	negative	-
TR_e_0350	TR-0042	Emin's giant pouched rat	Cricetomys emini	Rectal swab	NAP buffer	2021-10-05	negative	-
TR_e_0036	TR-0043	-	-	Faeces	NAP buffer	2021-10-05	negative	-
TR_e_0182	TR-0043	-	-	Oral swab	NAP buffer	2021-10-05	negative	-
TR_e_0351	TR-0043	-	-	Rectal swab	NAP buffer	2021-10-05	negative	-
TR_e_0037	TR-0044	-	-	Faeces	NAP buffer	2021-10-05	negative	-
TR_e_0183	TR-0044	-	-	Oral swab	NAP buffer	2021-10-05	negative	-
TR_e_0352	TR-0044	-	-	Rectal swab	NAP buffer	2021-10-05	negative	-
TR_e_0038	TR-0045	-	-	Faeces	NAP buffer	2021-10-05	negative	-
TR_e_0184	TR-0045	-	-	Oral swab	NAP buffer	2021-10-05	negative	-
TR_e_0353	TR-0045	-	-	Rectal swab	NAP buffer	2021-10-05	negative	-
TR_e_0039	TR-0046	-	-	Faeces	NAP buffer	2021-10-05	negative	-
TR_e_0185	TR-0046	-	-	Oral swab	NAP buffer	2021-10-05	negative	-
TR_e_0354	TR-0046	-	-	Rectal swab	NAP buffer	2021-10-05	negative	-
TR_e_0069	TR-0047	-	-	Liver	NAP buffer	2021-10-05	negative	-
TR_e_0070	TR-0047	-	-	Nose & tongue	NAP buffer	2021-10-05	negative	-
TR_e_0071	TR-0047	-	-	Spleen	NAP buffer	2021-10-05	negative	-
TR_e_0186	TR-0047	-	-	Oral swab	NAP buffer	2021-10-05	negative	-
TR_e_0355	TR-0047	-	-	Rectal swab	NAP buffer	2021-10-05	negative	-
TR_e_0040	TR-0048	Emin's giant pouched rat	Cricetomys emini	Faeces	NAP buffer	2021-10-06	negative	-
TR_e_0099	TR-0048	Emin's giant pouched rat	Cricetomys emini	Lesion mouth swab & scab	NAP buffer	2021-10-06	negative	-
TR_e_0100	TR-0048	Emin's giant pouched rat	Cricetomys emini	Lesion paw swab & scab	NAP buffer	2021-10-06	negative	-
TR_e_0187	TR-0048	Emin's giant pouched rat	Cricetomys emini	Oral swab	NAP buffer	2021-10-06	negative	-
TR_e_0356	TR-0048	Emin's giant pouched rat	Cricetomys emini	Rectal swab	NAP buffer	2021-10-06	negative	-
TR_e_0041	TR-0049	-	-	Faeces	NAP buffer	2021-10-06	negative	-
TR_e_0188	TR-0049	-	-	Oral swab	NAP buffer	2021-10-06	negative	-
TR_e_0357	TR-0049	-	-	Rectal swab	NAP buffer	2021-10-06	negative	-
TR_e_0091	TR-0050	Emin's giant pouched rat	Cricetomys emini	Lesion left arm	None	2021-10-07	negative	-
TR_e_0092	TR-0050	Emin's giant pouched rat	Cricetomys emini	Lesion left cheek	None	2021-10-07	negative	-
TR_e_0101	TR-0050	Emin's giant pouched rat	Cricetomys emini	Lesion back swab	None	2021-10-07	negative	-
TR_e_0120	TR-0050	Emin's giant pouched rat	Cricetomys emini	Nasal swab	NAP buffer	2021-10-07	negative	-
TR_e_0189	TR-0050	Emin's giant pouched rat	Cricetomys emini	Oral swab	NAP buffer	2021-10-07	negative	-
TR_e_0358	TR-0050	Emin's giant pouched rat	Cricetomys emini	Rectal swab	NAP buffer	2021-10-07	negative	-
TR_e_0093	TR-0051	Emin's giant pouched rat	Cricetomys emini	Lesion eye	None	2021-10-07	negative	-
TR_e_0102	TR-0051	Emin's giant pouched rat	Cricetomys emini	Lesion abdomen swab	None	2021-10-07	negative	-
TR_e_0121	TR-0051	Emin's giant pouched rat	Cricetomys emini	Nasal swab	NAP buffer	2021-10-07	negative	-
TR_e_0190	TR-0051	Emin's giant pouched rat	Cricetomys emini	Oral swab	NAP buffer	2021-10-07	negative	-
TR_e_0359	TR-0051	Emin's giant pouched rat	Cricetomys emini	Rectal swab	NAP buffer	2021-10-07	negative	-
TR_e_0042	TR-0052	-	-	Faeces	NAP buffer	2021-10-07	negative	-
TR_e_0191	TR-0052	-	-	Oral swab	NAP buffer	2021-10-07	negative	-
TR_e_0360	TR-0052	-	-	Rectal swab	NAP buffer	2021-10-07	negative	-
TR_e_0043	TR-0053	-	-	Faeces	NAP buffer	2021-10-07	negative	-
TR_e_0192	TR-0053	-	-	Oral swab	NAP buffer	2021-10-07	negative	-
TR_e_0361	TR-0053	-	-	Rectal swab	NAP buffer	2021-10-07	negative	-
TR_e_0044	TR-0054	-	-	Faeces	NAP buffer	2021-10-07	negative	-
TR_e_0193	TR-0054	-	-	Oral swab	NAP buffer	2021-10-07	negative	-
TR_e_0362	TR-0054	-	-	Rectal swab	NAP buffer	2021-10-07	negative	-
TR_e_0122	TR-0055	Emin's giant pouched rat	Cricetomys emini	Nasal swab	NAP buffer	2021-10-07	negative	-
TR_e_0194	TR-0055	Emin's giant pouched rat	Cricetomys emini	Oral swab	NAP buffer	2021-10-07	negative	-
TR_e_0363	TR-0055	Emin's giant pouched rat	Cricetomys emini	Rectal swab	NAP buffer	2021-10-07	negative	-
TR_e_0045	TR-0056	-	-	Faeces	NAP buffer	2021-10-07	negative	-
TR_e_0195	TR-0056	-	-	Oral swab	NAP buffer	2021-10-07	negative	-
TR_e_0364	TR-0056	-	-	Rectal swab	NAP buffer	2021-10-07	negative	-
TR_e_0046	TR-0057	-	-	Faeces	NAP buffer	2021-10-07	negative	-
TR_e_0196	TR-0057	-	-	Oral swab	NAP buffer	2021-10-07	negative	-
TR_e_0365	TR-0057	-	-	Rectal swab	NAP buffer	2021-10-07	negative	-
TR_e_0103	TR-0061	Emin's giant pouched rat	Cricetomys emini	Lesion cheek swab	None	2021-10-07	negative	-
TR_e_0104	TR-0061	Emin's giant pouched rat	Cricetomys emini	Lesion lower jaw swab	None	2021-10-07	negative	-
TR_e_0105	TR-0061	Emin's giant pouched rat	Cricetomys emini	Lesion right abdomen swab	None	2021-10-07	negative	-
TR_e_0047	TR-0058	Emin's giant pouched rat	Cricetomys emini	Faeces	NAP buffer	2021-10-16	negative	-
TR_e_0048	TR-0058	Emin's giant pouched rat	Cricetomys emini	Faeces	None	2021-10-16	negative	-
TR_e_0094	TR-0058	Emin's giant pouched rat	Cricetomys emini	Lesion arm	None	2021-10-16	negative	-
TR_e_0123	TR-0058	Emin's giant pouched rat	Cricetomys emini	Nasal swab	NAP buffer	2021-10-16	negative	-
TR_e_0197	TR-0058	Emin's giant pouched rat	Cricetomys emini	Oral swab	NAP buffer	2021-10-16	negative	-
TR_e_0366	TR-0058	Emin's giant pouched rat	Cricetomys emini	Rectal swab	NAP buffer	2021-10-16	negative	-
TR_e_0049	TR-0059	-	-	Faeces	NAP buffer	2021-10-16	negative	-
TR_e_0198	TR-0059	-	-	Oral swab	NAP buffer	2021-10-16	negative	-
TR_e_0367	TR-0059	-	-	Rectal swab	NAP buffer	2021-10-16	negative	-
TR_e_0050	TR-0060	-	-	Faeces	NAP buffer	2021-10-16	negative	-
TR_e_0199	TR-0060	-	-	Oral swab	NAP buffer	2021-10-16	negative	-
TR_e_0368	TR-0060	-	-	Rectal swab	NAP buffer	2021-10-16	negative	-
TR_e_0124	TR-0061	Emin's giant pouched rat	Cricetomys emini	Nasal swab	NAP buffer	2021-10-17	negative	-
TR_e_0051	TR-0062	-	-	Faeces	None	2021-10-17	negative	-
TR_e_0200	TR-0062	-	-	Oral swab	NAP buffer	2021-10-17	negative	-
TR_e_0369	TR-0062	-	-	Rectal swab	NAP buffer	2021-10-17	negative	-
TR_e_0052	TR-0063	-	-	Faeces	NAP buffer	2021-10-18	negative	-
TR_e_0201	TR-0063	-	-	Oral swab	NAP buffer	2021-10-18	negative	-
TR_e_0370	TR-0063	-	-	Rectal swab	NAP buffer	2021-10-18	negative	-
TR_e_0053	TR-0064	-	-	Faeces	NAP buffer	2021-10-19	negative	-
TR_e_0202	TR-0064	-	-	Oral swab	NAP buffer	2021-10-19	negative	-
TR_e_0371	TR-0064	-	-	Rectal swab	NAP buffer	2021-10-19	negative	-
TR_e_0106	TR-0065	African brush-tailed porcupine	Atherurus africanus	Lesion right foot swab	None	2021-10-20	negative	-
TR_e_0125	TR-0065	African brush-tailed porcupine	Atherurus africanus	Nasal swab	NAP buffer	2021-10-20	negative	-
TR_e_0203	TR-0065	African brush-tailed porcupine	Atherurus africanus	Oral swab	NAP buffer	2021-10-20	negative	-
TR_e_0372	TR-0065	African brush-tailed porcupine	Atherurus africanus	Rectal swab	NAP buffer	2021-10-20	negative	-
TR_e_0054	TR-0066	-	-	Faeces	NAP buffer	2021-10-20	negative	-
TR_e_0055	TR-0067	-	-	Faeces	NAP buffer	2021-10-20	negative	-
TR_e_0204	TR-0067	-	-	Oral swab	NAP buffer	2021-10-20	negative	-
TR_e_0373	TR-0067	-	-	Rectal swab	NAP buffer	2021-10-20	negative	-
TR_e_0056	TR-0068	-	-	Faeces	NAP buffer	2021-10-20	negative	-
TR_e_0205	TR-0068	-	-	Oral swab	NAP buffer	2021-10-20	negative	-
TR_e_0374	TR-0068	-	-	Rectal swab	NAP buffer	2021-10-20	negative	-
TR_e_0057	TR-0069	-	-	Faeces	NAP buffer	2021-10-20	negative	-
TR_e_0206	TR-0069	-	-	Oral swab	NAP buffer	2021-10-20	negative	-
TR_e_0375	TR-0069	-	-	Rectal swab	NAP buffer	2021-10-20	negative	-
TR_e_0126	TR-0071	Emin's giant pouched rat	Cricetomys emini	Nasal swab	NAP buffer	2021-10-21	negative	-
TR_e_0207	TR-0071	Emin's giant pouched rat	Cricetomys emini	Oral swab	NAP buffer	2021-10-21	negative	-
TR_e_0376	TR-0071	Emin's giant pouched rat	Cricetomys emini	Rectal swab	NAP buffer	2021-10-21	negative	-
TR_e_0127	TR-0072	Emin's giant pouched rat	Cricetomys emini	Nasal swab	NAP buffer	2021-10-27	negative	-
TR_e_0208	TR-0072	Emin's giant pouched rat	Cricetomys emini	Oral swab	NAP buffer	2021-10-27	negative	-
TR_e_0377	TR-0072	Emin's giant pouched rat	Cricetomys emini	Rectal swab	NAP buffer	2021-10-27	negative	-
TR_e_0058	TR-0076	-	-	Faeces	NAP buffer	2021-10-27	negative	-
TR_e_0209	TR-0076	-	-	Oral swab	NAP buffer	2021-10-27	negative	-
TR_e_0379	TR-0076	-	-	Rectal swab	NAP buffer	2021-10-27	negative	-
TR_e_0128	TR-0078	Emin's giant pouched rat	Cricetomys emini	Nasal swab	NAP buffer	2021-10-28	negative	-
TR_e_0210	TR-0078	Emin's giant pouched rat	Cricetomys emini	Oral swab	NAP buffer	2021-10-28	negative	-
TR_e_0380	TR-0078	Emin's giant pouched rat	Cricetomys emini	Rectal swab	NAP buffer	2021-10-28	negative	-
TR_e_0129	TR-0079	Emin's giant pouched rat	Cricetomys emini	Nasal swab	NAP buffer	2021-10-28	negative	-
TR_e_0211	TR-0079	Emin's giant pouched rat	Cricetomys emini	Oral swab	NAP buffer	2021-10-28	negative	-
TR_e_0381	TR-0079	Emin's giant pouched rat	Cricetomys emini	Rectal swab	NAP buffer	2021-10-28	negative	-
TR_e_0130	TR-0080	Emin's giant pouched rat	Cricetomys emini	Nasal swab	NAP buffer	2021-10-28	negative	-
TR_e_0213	TR-0080	Emin's giant pouched rat	Cricetomys emini	Oral swab	NAP buffer	2021-10-28	negative	-
TR_e_0382	TR-0080	Emin's giant pouched rat	Cricetomys emini	Rectal swab	NAP buffer	2021-10-28	negative	-
TR_e_0219	TR-0082	-	-	Oral swab	NAP buffer	2021-10-28	negative	-
TR_e_0388	TR-0082	-	-	Rectal swab	NAP buffer	2021-10-28	negative	-
TR_e_0378	TR-0084	-	-	Rectal swab	NAP buffer	2021-10-29	negative	-
TR_e_0131	TR-0083	Emin's giant pouched rat	Cricetomys emini	Nasal swab	NAP buffer	2021-10-29	negative	-
TR_e_0214	TR-0083	Emin's giant pouched rat	Cricetomys emini	Oral swab	NAP buffer	2021-10-29	negative	-
TR_e_0383	TR-0083	Emin's giant pouched rat	Cricetomys emini	Rectal swab	NAP buffer	2021-10-29	negative	-
TR_e_0215	TR-0084	-	-	Oral swab	NAP buffer	2021-10-29	negative	-
TR_e_0059	TR-0085	Emin's giant pouched rat	Cricetomys emini	Faeces	NAP buffer	2021-11-02	negative	-
TR_e_0132	TR-0085	Emin's giant pouched rat	Cricetomys emini	Nasal swab	NAP buffer	2021-11-02	negative	-
TR_e_0216	TR-0085	Emin's giant pouched rat	Cricetomys emini	Oral swab	NAP buffer	2021-11-02	negative	-
TR_e_0385	TR-0085	Emin's giant pouched rat	Cricetomys emini	Rectal swab	NAP buffer	2021-11-02	negative	-
TR_e_0133	TR-0086	Emin's giant pouched rat	Cricetomys emini	Nasal swab	NAP buffer	2021-11-03	negative	-
TR_e_0217	TR-0086	Emin's giant pouched rat	Cricetomys emini	Oral swab	NAP buffer	2021-11-03	negative	-
TR_e_0386	TR-0086	Emin's giant pouched rat	Cricetomys emini	Rectal swab	NAP buffer	2021-11-03	negative	-
TR_e_0072	TR-0087	Emin's giant pouched rat	Cricetomys emini	Liver	NAP buffer	2021-11-07	negative	-
TR_e_0073	TR-0087	Emin's giant pouched rat	Cricetomys emini	Lymphnodes	NAP buffer	2021-11-07	negative	-
TR_e_0074	TR-0087	Emin's giant pouched rat	Cricetomys emini	Spleen	NAP buffer	2021-11-07	negative	-
TR_e_0218	TR-0087	Emin's giant pouched rat	Cricetomys emini	Oral swab	NAP buffer	2021-11-07	negative	-
TR_e_0387	TR-0087	Emin's giant pouched rat	Cricetomys emini	Rectal swab	NAP buffer	2021-11-07	negative	-
TR_e_0220	TR-0100	-	-	Oral swab	NAP buffer	2023-03-15	negative	-
TR_e_0389	TR-0100	-	-	Rectal swab	NAP buffer	2023-03-15	negative	-
TR_e_0503	TR-0100	-	-	Faeces	NAP buffer	2023-03-15	negative	-
TR_e_0221	TR-0101	-	-	Oral swab	NAP buffer	2023-03-15	negative	-
TR_e_0390	TR-0101	-	-	Rectal swab	NAP buffer	2023-03-15	negative	-
TR_e_0504	TR-0101	-	-	Faeces	NAP buffer	2023-03-15	negative	-
TR_e_0481	TR-0102	-	-	Swab1	NAP buffer	2023-03-16	negative	-
TR_e_0482	TR-0102	-	-	Swab2	NAP buffer	2023-03-16	negative	-
TR_e_0483	TR-0102	-	-	Swab3	NAP buffer	2023-03-16	negative	-
TR_e_0505	TR-0102	-	-	Faeces	NAP buffer	2023-03-16	negative	-
TR_e_0134	TR-0103	Emin's giant pouched rat	Cricetomys emini	Nasal swab	NAP buffer	2023-03-16	negative	-
TR_e_0223	TR-0103	Emin's giant pouched rat	Cricetomys emini	Oral swab	NAP buffer	2023-03-16	negative	-
TR_e_0392	TR-0103	Emin's giant pouched rat	Cricetomys emini	Rectal swab	NAP buffer	2023-03-16	negative	-
TR_e_0224	TR-0104	-	-	Oral swab	NAP buffer	2023-03-17	negative	-
TR_e_0393	TR-0104	-	-	Rectal swab	NAP buffer	2023-03-17	negative	-
TR_e_0507	TR-0104	-	-	Faeces	NAP buffer	2023-03-17	negative	-
TR_e_0225	TR-0105	-	-	Oral swab	NAP buffer	2023-03-17	negative	-
TR_e_0394	TR-0105	-	-	Rectal swab	NAP buffer	2023-03-17	negative	-
TR_e_0508	TR-0105	-	-	Faeces	NAP buffer	2023-03-17	negative	-
TR_e_0075	TR-0106	-	-	Liver	NAP buffer	2023-03-17	negative	-
TR_e_0076	TR-0106	-	-	Nose & tongue	NAP buffer	2023-03-17	negative	-
TR_e_0077	TR-0106	-	-	Spleen	NAP buffer	2023-03-17	negative	-
TR_e_0226	TR-0106	-	-	Oral swab	NAP buffer	2023-03-17	negative	-
TR_e_0395	TR-0106	-	-	Rectal swab	NAP buffer	2023-03-17	negative	-
TR_e_0509	TR-0106	-	-	Faeces	NAP buffer	2023-03-17	negative	-
TR_e_0227	TR-0107	-	-	Oral swab	NAP buffer	2023-03-20	negative	-
TR_e_0396	TR-0107	-	-	Rectal swab	NAP buffer	2023-03-20	negative	-
TR_e_0510	TR-0107	-	-	Faeces	NAP buffer	2023-03-20	negative	-
TR_e_0228	TR-0108	-	-	Oral swab	NAP buffer	2023-03-20	negative	-
TR_e_0397	TR-0108	-	-	Rectal swab	NAP buffer	2023-03-20	negative	-
TR_e_0511	TR-0108	-	-	Faeces	NAP buffer	2023-03-20	negative	-
TR_e_0229	TR-0109	-	-	Oral swab	NAP buffer	2023-03-20	negative	-
TR_e_0398	TR-0109	-	-	Rectal swab	NAP buffer	2023-03-20	negative	-
TR_e_0512	TR-0109	-	-	Faeces	NAP buffer	2023-03-20	negative	-
TR_e_0230	TR-0110	-	-	Oral swab	NAP buffer	2023-03-20	negative	-
TR_e_0399	TR-0110	-	-	Rectal swab	NAP buffer	2023-03-20	negative	-
TR_e_0484	TR-0110	-	-	Eczema tail swab	NAP buffer	2023-03-20	negative	-
TR_e_0499	TR-0110	-	-	Faeces	NAP buffer	2023-03-20	negative	-
TR_e_0231	TR-0111	-	-	Oral swab	NAP buffer	2023-03-20	negative	-
TR_e_0400	TR-0111	-	-	Rectal swab	NAP buffer	2023-03-20	negative	-
TR_e_0513	TR-0111	-	-	Faeces	NAP buffer	2023-03-20	negative	-
TR_e_0232	TR-0112	-	-	Oral swab	NAP buffer	2023-03-20	negative	-
TR_e_0401	TR-0112	-	-	Rectal swab	NAP buffer	2023-03-20	negative	-
TR_e_0514	TR-0112	-	-	Faeces	NAP buffer	2023-03-20	negative	-
TR_e_0233	TR-0113	-	-	Oral swab	NAP buffer	2023-03-20	negative	-
TR_e_0402	TR-0113	-	-	Rectal swab	NAP buffer	2023-03-20	negative	-
TR_e_0515	TR-0113	-	-	Faeces	NAP buffer	2023-03-20	negative	-
TR_e_0234	TR-0114	-	-	Oral swab	NAP buffer	2023-03-20	negative	-
TR_e_0403	TR-0114	-	-	Rectal swab	NAP buffer	2023-03-20	negative	-
TR_e_0135	TR-0115	Emin's giant pouched rat	Cricetomys emini	Nasal swab	NAP buffer	2023-03-21	negative	-
TR_e_0235	TR-0115	Emin's giant pouched rat	Cricetomys emini	Oral swab	NAP buffer	2023-03-21	negative	-
TR_e_0404	TR-0115	Emin's giant pouched rat	Cricetomys emini	Rectal swab	NAP buffer	2023-03-21	negative	-
TR_e_0236	TR-0116	-	-	Oral swab	NAP buffer	2023-03-21	negative	-
TR_e_0405	TR-0116	-	-	Rectal swab	NAP buffer	2023-03-21	negative	-
TR_e_0516	TR-0116	-	-	Faeces	NAP buffer	2023-03-21	negative	-
TR_e_0237	TR-0117	-	-	Oral swab	NAP buffer	2023-03-21	negative	-
TR_e_0406	TR-0117	-	-	Rectal swab	NAP buffer	2023-03-21	negative	-
TR_e_0517	TR-0117	-	-	Faeces	NAP buffer	2023-03-21	negative	-
TR_e_0238	TR-0118	-	-	Oral swab	NAP buffer	2023-03-21	negative	-
TR_e_0407	TR-0118	-	-	Rectal swab	NAP buffer	2023-03-21	negative	-
TR_e_0518	TR-0118	-	-	Faeces	NAP buffer	2023-03-21	negative	-
TR_e_0239	TR-0119	-	-	Oral swab	NAP buffer	2023-03-21	negative	-
TR_e_0408	TR-0119	-	-	Rectal swab	NAP buffer	2023-03-21	negative	-
TR_e_0112	TR-0120	Emin's giant pouched rat	Cricetomys emini	Eczema body swab	NAP buffer	2023-03-22	negative	-
TR_e_0136	TR-0120	Emin's giant pouched rat	Cricetomys emini	Nasal swab	NAP buffer	2023-03-22	negative	-
TR_e_0240	TR-0120	Emin's giant pouched rat	Cricetomys emini	Oral swab	NAP buffer	2023-03-22	negative	-
TR_e_0409	TR-0120	Emin's giant pouched rat	Cricetomys emini	Rectal swab	NAP buffer	2023-03-22	negative	-
TR_e_0113	TR-0120	Emin's giant pouched rat	Cricetomys emini	Eczema tail swab	NAP buffer	2023-03-22	negative	-
TR_e_0078	TR-0121	-	-	Liver	NAP buffer	2023-03-22	negative	-
TR_e_0079	TR-0121	-	-	Nose & tongue	NAP buffer	2023-03-22	negative	-
TR_e_0080	TR-0121	-	-	Spleen	NAP buffer	2023-03-22	negative	-
TR_e_0241	TR-0121	-	-	Oral swab	NAP buffer	2023-03-22	negative	-
TR_e_0410	TR-0121	-	-	Rectal swab	NAP buffer	2023-03-22	negative	-
TR_e_0519	TR-0121	-	-	Faeces	NAP buffer	2023-03-22	negative	-
TR_e_0082	TR-0122	Forest giant squirrel	Protoxerus stangeri	Liver	NAP buffer	2023-03-23	negative	-
TR_e_0083	TR-0122	Forest giant squirrel	Protoxerus stangeri	Nose & tongue	NAP buffer	2023-03-23	negative	-
TR_e_0084	TR-0122	Forest giant squirrel	Protoxerus stangeri	Spleen	NAP buffer	2023-03-23	negative	-
TR_e_0085	TR-0122	Forest giant squirrel	Protoxerus stangeri	Lesion shoulder	NAP buffer	2023-03-23	negative	-
TR_e_0086	TR-0122	Forest giant squirrel	Protoxerus stangeri	Lesion abdomen	NAP buffer	2023-03-23	negative	-
TR_e_0087	TR-0122	Forest giant squirrel	Protoxerus stangeri	Lesion throat	NAP buffer	2023-03-23	negative	-
TR_e_0137	TR-0122	Forest giant squirrel	Protoxerus stangeri	Nasal swab	NAP buffer	2023-03-23	negative	-
TR_e_0242	TR-0122	Forest giant squirrel	Protoxerus stangeri	Oral swab	NAP buffer	2023-03-23	negative	-
TR_e_0411	TR-0122	Forest giant squirrel	Protoxerus stangeri	Rectal swab	NAP buffer	2023-03-23	negative	-
TR_e_0485	TR-0122	Forest giant squirrel	Protoxerus stangeri	Inside of lesion stomach swab	None	2023-03-23	negative	-
TR_e_0486	TR-0122	Forest giant squirrel	Protoxerus stangeri	Lesion shoulder	NAP buffer	2023-03-23	negative	-
TR_e_0487	TR-0122	Forest giant squirrel	Protoxerus stangeri	Lesion throat	NAP buffer	2023-03-23	negative	-
TR_e_0488	TR-0122	Forest giant squirrel	Protoxerus stangeri	Lung	NAP buffer	2023-03-23	negative	-
TR_e_0520	TR-0122	Forest giant squirrel	Protoxerus stangeri	Faeces	NAP buffer	2023-03-23	negative	-
TR_e_0138	TR-0123	Emin's giant pouched rat	Cricetomys emini	Nasal swab	NAP buffer	2023-03-23	negative	-
TR_e_0243	TR-0123	Emin's giant pouched rat	Cricetomys emini	Oral swab	NAP buffer	2023-03-23	negative	-
TR_e_0412	TR-0123	Emin's giant pouched rat	Cricetomys emini	Rectal swab	NAP buffer	2023-03-23	negative	-
TR_e_0244	TR-0124	-	-	Oral swab	NAP buffer	2023-03-23	negative	-
TR_e_0413	TR-0124	-	-	Rectal swab	NAP buffer	2023-03-23	negative	-
TR_e_0245	TR-0125	-	-	Oral swab	NAP buffer	2023-03-23	negative	-
TR_e_0414	TR-0125	-	-	Rectal swab	NAP buffer	2023-03-23	negative	-
TR_e_0246	TR-0126	-	-	Oral swab	NAP buffer	2023-03-23	negative	-
TR_e_0415	TR-0126	-	-	Rectal swab	NAP buffer	2023-03-23	negative	-
TR_e_0521	TR-0126	-	-	Faeces	NAP buffer	2023-03-23	negative	-
TR_e_0247	TR-0127	-	-	Oral swab	NAP buffer	2023-03-23	negative	-
TR_e_0416	TR-0127	-	-	Rectal swab	NAP buffer	2023-03-23	negative	-
TR_e_0522	TR-0127	-	-	Faeces	NAP buffer	2023-03-23	negative	-
TR_e_0248	TR-0128	-	-	Oral swab	NAP buffer	2023-03-23	negative	-
TR_e_0417	TR-0128	-	-	Rectal swab	NAP buffer	2023-03-23	negative	-
TR_e_0523	TR-0128	-	-	Faeces	NAP buffer	2023-03-23	negative	-
TR_e_0249	TR-0129	-	-	Oral swab	NAP buffer	2023-03-23	negative	-
TR_e_0418	TR-0129	-	-	Rectal swab	NAP buffer	2023-03-23	negative	-
TR_e_0524	TR-0129	-	-	Faeces	NAP buffer	2023-03-23	negative	-
TR_e_0250	TR-0130	-	-	Oral swab	NAP buffer	2023-03-23	negative	-
TR_e_0419	TR-0130	-	-	Rectal swab	NAP buffer	2023-03-23	negative	-
TR_e_0525	TR-0130	-	-	Faeces	NAP buffer	2023-03-23	negative	-
TR_e_0251	TR-0131	-	-	Oral swab	NAP buffer	2023-03-23	negative	-
TR_e_0420	TR-0131	-	-	Rectal swab	NAP buffer	2023-03-23	negative	-
TR_e_0526	TR-0131	-	-	Faeces	NAP buffer	2023-03-23	negative	-
TR_e_0252	TR-0132	-	-	Oral swab	NAP buffer	2023-03-24	negative	-
TR_e_0421	TR-0132	-	-	Rectal swab	NAP buffer	2023-03-24	negative	-
TR_e_0527	TR-0132	-	-	Faeces	NAP buffer	2023-03-24	negative	-
TR_e_0253	TR-0133	-	-	Oral swab	NAP buffer	2023-03-24	negative	-
TR_e_0422	TR-0133	-	-	Rectal swab	NAP buffer	2023-03-24	negative	-
TR_e_0528	TR-0133	-	-	Faeces	NAP buffer	2023-03-24	negative	-
TR_e_0254	TR-0134	-	-	Oral swab	NAP buffer	2023-03-26	negative	-
TR_e_0423	TR-0134	-	-	Rectal swab	NAP buffer	2023-03-26	negative	-
TR_e_0529	TR-0134	-	-	Faeces	NAP buffer	2023-03-26	negative	-
TR_e_0255	TR-0135	-	-	Oral swab	NAP buffer	2023-03-26	negative	-
TR_e_0424	TR-0135	-	-	Rectal swab	NAP buffer	2023-03-26	negative	-
TR_e_0530	TR-0135	-	-	Faeces	NAP buffer	2023-03-26	negative	-
TR_e_0256	TR-0136	-	-	Oral swab	NAP buffer	2023-03-27	negative	-
TR_e_0425	TR-0136	-	-	Rectal swab	NAP buffer	2023-03-27	negative	-
TR_e_0531	TR-0136	-	-	Faeces	NAP buffer	2023-03-27	negative	-
TR_e_0257	TR-0137	-	-	Oral swab	NAP buffer	2023-03-29	negative	-
TR_e_0426	TR-0137	-	-	Rectal swab	NAP buffer	2023-03-29	negative	-
TR_e_0532	TR-0137	-	-	Faeces	NAP buffer	2023-03-29	negative	-
TR_e_0258	TR-0138	-	-	Oral swab	NAP buffer	2023-03-29	negative	-
TR_e_0427	TR-0138	-	-	Rectal swab	NAP buffer	2023-03-29	negative	-
TR_e_0533	TR-0138	-	-	Faeces	NAP buffer	2023-03-29	negative	-
TR_e_0088	TR-0139	-	-	Lesion forehead swab	NAP buffer	2023-03-30	negative	-
TR_e_0259	TR-0139	-	-	Oral swab	NAP buffer	2023-03-30	negative	-
TR_e_0428	TR-0139	-	-	Rectal swab	NAP buffer	2023-03-30	negative	-
TR_e_0534	TR-0139	-	-	Faeces	NAP buffer	2023-03-30	negative	-
TR_e_0260	TR-0140	-	-	Oral swab	NAP buffer	2023-03-30	negative	-
TR_e_0429	TR-0140	-	-	Rectal swab	NAP buffer	2023-03-30	negative	-
TR_e_0535	TR-0140	-	-	Faeces	NAP buffer	2023-03-30	negative	-
TR_e_0261	TR-0141	-	-	Oral swab	NAP buffer	2023-03-30	negative	-
TR_e_0430	TR-0141	-	-	Rectal swab	NAP buffer	2023-03-30	negative	-
TR_e_0536	TR-0141	-	-	Faeces	NAP buffer	2023-03-30	negative	-
TR_e_0262	TR-0142	-	-	Oral swab	NAP buffer	2023-03-30	negative	-
TR_e_0431	TR-0142	-	-	Rectal swab	NAP buffer	2023-03-30	negative	-
TR_e_0537	TR-0142	-	-	Faeces	NAP buffer	2023-03-30	negative	-
TR_e_0263	TR-0143	-	-	Oral swab	NAP buffer	2023-03-30	negative	-
TR_e_0432	TR-0143	-	-	Rectal swab	NAP buffer	2023-03-30	negative	-
TR_e_0538	TR-0143	-	-	Faeces	NAP buffer	2023-03-30	negative	-
TR_e_0433	TR-0144	-	-	Rectal swab	NAP buffer	2023-03-30	negative	-
TR_e_0264	TR-0144	-	-	Oral swab	NAP buffer	2023-03-30	negative	-
TR_e_0539	TR-0144	-	-	Faeces	NAP buffer	2023-03-30	negative	-
TR_e_0089	TR-0145	African brush-tailed porcupine	Atherurus africanus	Lesion scab	NAP buffer	2023-03-30	negative	-
TR_e_0114	TR-0145	African brush-tailed porcupine	Atherurus africanus	Lesion swab	NAP buffer	2023-03-30	negative	-
TR_e_0139	TR-0145	African brush-tailed porcupine	Atherurus africanus	Nasal swab	NAP buffer	2023-03-30	negative	-
TR_e_0265	TR-0145	African brush-tailed porcupine	Atherurus africanus	Oral swab	NAP buffer	2023-03-30	negative	-
TR_e_0434	TR-0145	African brush-tailed porcupine	Atherurus africanus	Rectal swab	NAP buffer	2023-03-30	negative	-
TR_e_0266	TR-0146	-	-	Oral swab	NAP buffer	2023-04-02	negative	-
TR_e_0435	TR-0146	-	-	Rectal swab	NAP buffer	2023-04-02	negative	-
TR_e_0541	TR-0146	-	-	Faeces	NAP buffer	2023-04-02	negative	-
TR_e_0267	TR-0147	-	-	Oral swab	NAP buffer	2023-04-02	negative	-
TR_e_0436	TR-0147	-	-	Rectal swab	NAP buffer	2023-04-02	negative	-
TR_e_0542	TR-0147	-	-	Faeces	NAP buffer	2023-04-02	negative	-
TR_e_0268	TR-0148	-	-	Oral swab	NAP buffer	2023-04-02	negative	-
TR_e_0437	TR-0148	-	-	Rectal swab	NAP buffer	2023-04-02	negative	-
TR_e_0269	TR-0149	-	-	Oral swab	NAP buffer	2023-04-02	negative	-
TR_e_0438	TR-0149	-	-	Rectal swab	NAP buffer	2023-04-02	negative	-
TR_e_0543	TR-0149	-	-	Faeces	NAP buffer	2023-04-02	negative	-
TR_e_0270	TR-0150	-	-	Oral swab	NAP buffer	2023-04-02	negative	-
TR_e_0439	TR-0150	-	-	Rectal swab	NAP buffer	2023-04-02	negative	-
TR_e_0544	TR-0150	-	-	Faeces	NAP buffer	2023-04-02	negative	-
TR_e_0271	TR-0151	-	-	Oral swab	NAP buffer	2023-04-02	negative	-
TR_e_0440	TR-0151	-	-	Rectal swab	NAP buffer	2023-04-02	negative	-
TR_e_0498	TR-0151	-	-	Faeces	NAP buffer	2023-04-02	negative	-
TR_e_0272	TR-0152	-	-	Oral swab	NAP buffer	2023-04-02	negative	-
TR_e_0441	TR-0152	-	-	Rectal swab	NAP buffer	2023-04-02	negative	-
TR_e_0545	TR-0152	-	-	Faeces	NAP buffer	2023-04-02	negative	-
TR_e_0273	TR-0154	-	-	Oral swab	NAP buffer	2023-04-02	negative	-
TR_e_0442	TR-0154	-	-	Rectal swab	NAP buffer	2023-04-02	negative	-
TR_e_0546	TR-0154	-	-	Faeces	NAP buffer	2023-04-02	negative	-
TR_e_0274	TR-0155	-	-	Oral swab	NAP buffer	2023-04-02	negative	-
TR_e_0443	TR-0155	-	-	Rectal swab	NAP buffer	2023-04-02	negative	-
TR_e_0547	TR-0155	-	-	Faeces	NAP buffer	2023-04-02	negative	-
TR_e_0275	TR-0156	-	-	Oral swab	NAP buffer	2023-04-02	negative	-
TR_e_0444	TR-0156	-	-	Rectal swab	NAP buffer	2023-04-02	negative	-
TR_e_0548	TR-0156	-	-	Faeces	NAP buffer	2023-04-02	negative	-
TR_e_0090	TR-0157	-	-	Lesion left hindleg scab	None	2023-04-03	negative	-
TR_e_0276	TR-0157	-	-	Oral swab	NAP buffer	2023-04-03	negative	-
TR_e_0445	TR-0157	-	-	Rectal swab	NAP buffer	2023-04-03	negative	-
TR_e_0549	TR-0157	-	-	Faeces	NAP buffer	2023-04-03	negative	-
TR_e_0277	TR-0158	-	-	Oral swab	NAP buffer	2023-04-03	negative	-
TR_e_0446	TR-0158	-	-	Rectal swab	NAP buffer	2023-04-03	negative	-
TR_e_0550	TR-0158	-	-	Faeces	NAP buffer	2023-04-03	negative	-
TR_e_0278	TR-0159	-	-	Oral swab	NAP buffer	2023-04-03	negative	-
TR_e_0447	TR-0159	-	-	Rectal swab	NAP buffer	2023-04-03	negative	-
TR_e_0551	TR-0159	-	-	Faeces	NAP buffer	2023-04-03	negative	-
TR_e_0279	TR-0160	-	-	Oral swab	NAP buffer	2023-04-05	negative	-
TR_e_0448	TR-0160	-	-	Rectal swab	NAP buffer	2023-04-05	negative	-
TR_e_0552	TR-0160	-	-	Faeces	NAP buffer	2023-04-05	negative	-
TR_e_0280	TR-0161	-	-	Oral swab	NAP buffer	2023-04-07	negative	-
TR_e_0449	TR-0161	-	-	Rectal swab	NAP buffer	2023-04-07	negative	-
TR_e_0553	TR-0161	-	-	Faeces	NAP buffer	2023-04-07	negative	-
TR_e_0281	TR-0162	-	-	Oral swab	NAP buffer	2023-04-07	negative	-
TR_e_0450	TR-0162	-	-	Rectal swab	NAP buffer	2023-04-07	negative	-
TR_e_0554	TR-0162	-	-	Faeces	NAP buffer	2023-04-07	negative	-
TR_e_0282	TR-0163	-	-	Oral swab	NAP buffer	2023-04-08	negative	-
TR_e_0451	TR-0163	-	-	Rectal swab	NAP buffer	2023-04-08	negative	-
TR_e_0555	TR-0163	-	-	Faeces	NAP buffer	2023-04-08	negative	-
TR_e_0283	TR-0164	-	-	Oral swab	NAP buffer	2023-04-08	negative	-
TR_e_0452	TR-0164	-	-	Rectal swab	NAP buffer	2023-04-08	negative	-
TR_e_0556	TR-0164	-	-	Faeces	NAP buffer	2023-04-08	negative	-
TR_e_0284	TR-0165	-	-	Oral swab	NAP buffer	2023-04-08	negative	-
TR_e_0453	TR-0165	-	-	Rectal swab	NAP buffer	2023-04-08	negative	-
TR_e_0557	TR-0165	-	-	Faeces	NAP buffer	2023-04-08	negative	-
TR_e_0285	TR-0166	-	-	Oral swab	NAP buffer	2023-04-08	negative	-
TR_e_0454	TR-0166	-	-	Rectal swab	NAP buffer	2023-04-08	negative	-
TR_e_0558	TR-0166	-	-	Faeces	NAP buffer	2023-04-08	negative	-
TR_e_0286	TR-0167	-	-	Oral swab	NAP buffer	2023-04-09	negative	-
TR_e_0455	TR-0167	-	-	Rectal swab	NAP buffer	2023-04-09	negative	-
TR_e_0559	TR-0167	-	-	Faeces	NAP buffer	2023-04-09	negative	-
TR_e_0287	TR-0168	-	-	Oral swab	NAP buffer	2023-04-09	negative	-
TR_e_0456	TR-0168	-	-	Rectal swab	NAP buffer	2023-04-09	negative	-
TR_e_0560	TR-0168	-	-	Faeces	NAP buffer	2023-04-09	negative	-
TR_e_0288	TR-0169	-	-	Oral swab	NAP buffer	2023-04-09	negative	-
TR_e_0457	TR-0169	-	-	Rectal swab	NAP buffer	2023-04-09	negative	-
TR_e_0480	TR-0169	-	-	Lesion ear swab	None	2023-04-09	negative	-
TR_e_0561	TR-0169	-	-	Faeces	NAP buffer	2023-04-09	negative	-
TR_e_0140	TR-0170	Emin's giant pouched rat	Cricetomys emini	Nasal swab	NAP buffer	2023-04-10	negative	-
TR_e_0289	TR-0170	Emin's giant pouched rat	Cricetomys emini	Oral swab	NAP buffer	2023-04-10	negative	-
TR_e_0458	TR-0170	Emin's giant pouched rat	Cricetomys emini	Rectal swab	NAP buffer	2023-04-10	negative	-
TR_e_0115	TR-0170	Emin's giant pouched rat	Cricetomys emini	Lesion swab	NAP buffer	2023-04-10	negative	-
TR_e_0290	TR-0171	-	-	Oral swab	NAP buffer	2023-04-10	negative	-
TR_e_0459	TR-0171	-	-	Rectal swab	NAP buffer	2023-04-10	negative	-
TR_e_0562	TR-0171	-	-	Faeces	NAP buffer	2023-04-10	negative	-
TR_e_0291	TR-0172	-	-	Oral swab	NAP buffer	2023-04-10	negative	-
TR_e_0460	TR-0172	-	-	Rectal swab	NAP buffer	2023-04-10	negative	-
TR_e_0563	TR-0172	-	-	Faeces	NAP buffer	2023-04-10	negative	-
TR_e_0292	TR-0173	-	-	Oral swab	NAP buffer	2023-04-10	negative	-
TR_e_0461	TR-0173	-	-	Rectal swab	NAP buffer	2023-04-10	negative	-
TR_e_0564	TR-0173	-	-	Faeces	NAP buffer	2023-04-10	negative	-
TR_e_0293	TR-0174	-	-	Oral swab	NAP buffer	2023-04-10	negative	-
TR_e_0462	TR-0174	-	-	Rectal swab	NAP buffer	2023-04-10	negative	-
TR_e_0565	TR-0174	-	-	Faeces	NAP buffer	2023-04-10	negative	-
TR_e_0141	TR-0175	Emin's giant pouched rat	Cricetomys emini	Nasal swab	NAP buffer	2023-04-11	negative	-
TR_e_0294	TR-0175	Emin's giant pouched rat	Cricetomys emini	Oral swab	NAP buffer	2023-04-11	negative	-
TR_e_0463	TR-0175	Emin's giant pouched rat	Cricetomys emini	Rectal swab	NAP buffer	2023-04-11	negative	-
TR_e_0116	TR-0176	-	-	Eczema testicle swab	NAP buffer	2023-04-11	negative	-
TR_e_0295	TR-0176	-	-	Oral swab	NAP buffer	2023-04-11	negative	-
TR_e_0464	TR-0176	-	-	Rectal swab	NAP buffer	2023-04-11	negative	-
TR_e_0566	TR-0176	-	-	Faeces	NAP buffer	2023-04-11	negative	-
TR_e_0296	TR-0177	-	-	Oral swab	NAP buffer	2023-04-11	negative	-
TR_e_0465	TR-0177	-	-	Rectal swab	NAP buffer	2023-04-11	negative	-
TR_e_0117	TR-0177	-	-	Eczema swab	NAP buffer	2023-04-11	negative	-
TR_e_0297	TR-0178	-	-	Oral swab	NAP buffer	2023-04-11	negative	-
TR_e_0466	TR-0178	-	-	Rectal swab	NAP buffer	2023-04-11	negative	-
TR_e_0568	TR-0178	-	-	Faeces	NAP buffer	2023-04-11	negative	-
TR_e_0298	TR-0179	-	-	Oral swab	NAP buffer	2023-04-12	negative	-
TR_e_0467	TR-0179	-	-	Rectal swab	NAP buffer	2023-04-12	negative	-
TR_e_0569	TR-0179	-	-	Faeces	NAP buffer	2023-04-12	negative	-
TR_e_0299	TR-0180	-	-	Oral swab	NAP buffer	2023-04-12	negative	-
TR_e_0468	TR-0180	-	-	Rectal swab	NAP buffer	2023-04-12	negative	-
TR_e_0570	TR-0180	-	-	Faeces	NAP buffer	2023-04-12	negative	-
TR_e_0300	TR-0181	-	-	Oral swab	NAP buffer	2023-04-12	negative	-
TR_e_0469	TR-0181	-	-	Rectal swab	NAP buffer	2023-04-12	negative	-
TR_e_0571	TR-0181	-	-	Faeces	NAP buffer	2023-04-12	negative	-
TR_e_0142	TR-0182	Emin's giant pouched rat	Cricetomys emini	Nasal swab	NAP buffer	2023-04-17	negative	-
TR_e_0301	TR-0182	Emin's giant pouched rat	Cricetomys emini	Oral swab	NAP buffer	2023-04-17	negative	-
TR_e_0470	TR-0182	Emin's giant pouched rat	Cricetomys emini	Rectal swab	NAP buffer	2023-04-17	negative	-
TR_e_0302	TR-0183	-	-	Oral swab	NAP buffer	2023-04-20	negative	-
TR_e_0471	TR-0183	-	-	Rectal swab	NAP buffer	2023-04-20	negative	-
TR_e_0572	TR-0183	-	-	Faeces	NAP buffer	2023-04-20	negative	-
TR_e_0303	TR-0184	-	-	Oral swab	NAP buffer	2023-04-20	negative	-
TR_e_0472	TR-0184	-	-	Rectal swab	NAP buffer	2023-04-20	negative	-
TR_e_0573	TR-0184	-	-	Faeces	NAP buffer	2023-04-20	negative	-
TR_e_0304	TR-0185	-	-	Oral swab	NAP buffer	2023-04-21	negative	-
TR_e_0473	TR-0185	-	-	Rectal swab	NAP buffer	2023-04-21	negative	-
TR_e_0574	TR-0185	-	-	Faeces	NAP buffer	2023-04-21	negative	-
TR_e_0305	TR-0186	-	-	Oral swab	NAP buffer	2023-04-21	negative	-
TR_e_0474	TR-0186	-	-	Rectal swab	NAP buffer	2023-04-21	negative	-
TR_e_0575	TR-0186	-	-	Faeces	NAP buffer	2023-04-21	negative	-
TR_e_0306	TR-0187	-	-	Oral swab	NAP buffer	2023-04-21	negative	-
TR_e_0475	TR-0187	-	-	Rectal swab	NAP buffer	2023-04-21	negative	-
TR_e_0576	TR-0187	-	-	Faeces	NAP buffer	2023-04-21	negative	-
TR_e_0307	TR-0188	-	-	Oral swab	NAP buffer	2023-04-21	negative	-
TR_e_0476	TR-0188	-	-	Rectal swab	NAP buffer	2023-04-21	negative	-
TR_e_0577	TR-0188	-	-	Faeces	NAP buffer	2023-04-21	negative	-
TR_e_0118	TR-0189	-	-	Lesion penis swab	NAP buffer	2023-04-22	negative	-
TR_e_0308	TR-0189	-	-	Oral swab	NAP buffer	2023-04-22	negative	-
TR_e_0477	TR-0189	-	-	Rectal swab	NAP buffer	2023-04-22	negative	-
TR_e_0578	TR-0189	-	-	Faeces	NAP buffer	2023-04-22	negative	-
TR_e_0309	TR-0190	-	-	Oral swab	NAP buffer	2023-04-22	negative	-
TR_e_0478	TR-0190	-	-	Rectal swab	NAP buffer	2023-04-22	negative	-
TR_e_0579	TR-0190	-	-	Faeces	NAP buffer	2023-04-22	negative	-
TR_e_0119	TR-0191	-	-	Lesion penis swab	NAP buffer	2023-04-24	negative	-
TR_e_0310	TR-0191	-	-	Oral swab	NAP buffer	2023-04-24	negative	-
TR_e_0479	TR-0191	-	-	Rectal swab	NAP buffer	2023-04-24	negative	-
TR_e_0580	TR-0191	-	-	Faeces	NAP buffer	2023-04-24	negative	-

## Sheet: Supp. Table 5- Other Necropsies
Supplementary Table 5 - Overview of other necropsy samples from Tain National Park Molecular Detection of OPV DNA in necropsy samples
Necropsy ID	Order name	Family name	Genus name	Species name	Common name	Sample type	Storage medium	Date	OPV PCR	OPV Copies/5µL	MPXV PCR	MPXV Copies/5µL	Capture and NGS	Genome coverage	Isolation atempt	Isolation
N191207	Rodentia	Anomaluridae	Anomalurus	Anomalurus beecrofti	Beecroft's flying squirrel	Lung	None	2019-12-07	negative	-	-	-	-	-	-	-
N191207	Rodentia	Anomaluridae	Anomalurus	Anomalurus beecrofti	Beecroft's flying squirrel	Spleen	None	2019-12-07	negative	-	-	-	-	-	-	-
N200214	Rodentia	Muridae	NA	NA	Mouse	Lung	NAP buffer	2020-02-14	negative	-	-	-	-	-	-	-
N200216	Rodentia	Sciuridae	Funisciurus	Funisciurus pyrropus	Fire-footed rope squirrel	Lung	None	2020-02-16	negative	-	-	-	-	-	-	-
N200216	Rodentia	Sciuridae	Funisciurus	Funisciurus pyrropus	Fire-footed rope squirrel	Spleen	None	2020-02-16	negative	-	-	-	-	-	-	-
N201019	Rodentia	Sciuridae	NA	NA	Squirrel	Lung	None	2020-10-19	negative	-	-	-	-	-	-	-
N201019	Rodentia	Sciuridae	NA	NA	Squirrel	Spleen	None	2020-10-19	negative	-	-	-	-	-	-	-
N221002	Primates	Cercopithecidae	Colobus	Colobus polykomos	King Colobus	Lung	None	2022-10-02	-	-	negative	-	-	-	-	-
N221002	Primates	Cercopithecidae	Colobus	Colobus polykomos	King Colobus	Skin	None	2022-10-02	-	-	negative	-	-	-	-	-
N221022	Primates	Cercopithecidae	Piliocolobus	Piliocolubus badius	Western red colobus	Blood swab	None	2022-10-22	-	-	negative	-	-	-	-	-
N221025	Carnivora	NA	NA	NA	Carnivore	Skin	None	2022-10-25	-	-	negative	-	-	-	-	-
N221025	Carnivora	NA	NA	NA	Carnivore	Nasal swab	None	2022-10-25	-	-	negative	-	-	-	-	-
N221025	Carnivora	NA	NA	NA	Carnivore	Oral swab	None	2022-10-25	-	-	negative	-	-	-	-	-
N221103	Rodentia	Sciuridae	Funisciurus	Funisciurus pyrropus	Fire-footed rope squirrel	Spleen	None	2022-11-03	positive	13110000	positive	1.81592e+07	x	complete 20x	x	yes
N221103	Rodentia	Sciuridae	Funisciurus	Funisciurus pyrropus	Fire-footed rope squirrel	Lung	None	2022-11-03	positive	2827500	positive	961141	x		x	yes
N221103	Rodentia	Sciuridae	Funisciurus	Funisciurus pyrropus	Fire-footed rope squirrel	Mesenteric lymph node	None	2022-11-03	positive	13710	positive	6828.1	-	-	-	-
N221103	Rodentia	Sciuridae	Funisciurus	Funisciurus pyrropus	Fire-footed rope squirrel	Kidney	None	2022-11-03	positive	105800	positive	79541.8	-	-	-	-
N221103	Rodentia	Sciuridae	Funisciurus	Funisciurus pyrropus	Fire-footed rope squirrel	Liver	None	2022-11-03	positive	10720000	positive	1.01645e+07	-	-	x	yes
N221103	Rodentia	Sciuridae	Funisciurus	Funisciurus pyrropus	Fire-footed rope squirrel	Small intestine	None	2022-11-03	positive	23280	positive	16531.8	-	-	-	-
N221103	Rodentia	Sciuridae	Funisciurus	Funisciurus pyrropus	Fire-footed rope squirrel	Stomach	None	2022-11-03	positive	27000	positive	23326.2	-	-	-	-
N221103	Rodentia	Sciuridae	Funisciurus	Funisciurus pyrropus	Fire-footed rope squirrel	Pulmonary lymph node	None	2022-11-03	positive	31700	positive	12584	-	-	-	-
N221103	Rodentia	Sciuridae	Funisciurus	Funisciurus pyrropus	Fire-footed rope squirrel	Heart	None	2022-11-03	positive	46400	positive	29468.9	-	-	-	-
N221103	Rodentia	Sciuridae	Funisciurus	Funisciurus pyrropus	Fire-footed rope squirrel	Testicle	NAP buffer	2022-11-03	positive	155500	positive	53261.5	-	-	-	-
N221103	Rodentia	Sciuridae	Funisciurus	Funisciurus pyrropus	Fire-footed rope squirrel	Muscle	NAP buffer	2022-11-03	positive	40850	positive	32649.4	-	-	-	-
N221103	Rodentia	Sciuridae	Funisciurus	Funisciurus pyrropus	Fire-footed rope squirrel	Axillary lymph node	NAP buffer	2022-11-03	positive	28500	positive	20148	-	-	-	-
N221103	Rodentia	Sciuridae	Funisciurus	Funisciurus pyrropus	Fire-footed rope squirrel	Large intestine	NAP buffer	2022-11-03	positive	4605	positive	2814.4	-	-	-	-
N221103	Rodentia	Sciuridae	Funisciurus	Funisciurus pyrropus	Fire-footed rope squirrel	Skin	NAP buffer	2022-11-03	positive	143500	positive	125645	-	-	x	yes
N221103	Rodentia	Sciuridae	Funisciurus	Funisciurus pyrropus	Fire-footed rope squirrel	Urinary bladder	NAP buffer	2022-11-03	positive	57950	positive	25290.8	-	-	-	-
N221103	Rodentia	Sciuridae	Funisciurus	Funisciurus pyrropus	Fire-footed rope squirrel	Faeces	None	2022-11-03	positive	26150	positive	50235.1	-	-	x	no
N221103	Rodentia	Sciuridae	Funisciurus	Funisciurus pyrropus	Fire-footed rope squirrel	Nasal swab	None	2022-11-03	positive	574500	positive	589978	-	-	-	-
N221103	Rodentia	Sciuridae	Funisciurus	Funisciurus pyrropus	Fire-footed rope squirrel	Throat swab	None	2022-11-03	positive	49550	positive	42209.4	-	-	-	-
N221103	Rodentia	Sciuridae	Funisciurus	Funisciurus pyrropus	Fire-footed rope squirrel	Genital swab	None	2022-11-03	positive	767500	positive	437530	-	-	-	-
N221103	Rodentia	Sciuridae	Funisciurus	Funisciurus pyrropus	Fire-footed rope squirrel	Maggots	None	2022-11-03	positive	36600	positive	11850	-	-	x	no
N221110	Carnivora	Nandiniidae	Nandinia	Nandinia binotata	African palm civet	Skin	NAP buffer	2022-11-10	-	-	negative	-	-	-	-	-
N221110	Carnivora	Nandiniidae	Nandinia	Nandinia binotata	African palm civet	Spleen	NAP buffer	2022-11-10	-	-	negative	-	-	-	-	-
N221110	Carnivora	Nandiniidae	Nandinia	Nandinia binotata	African palm civet	Lung	None	2022-11-10	-	-	negative	-	-	-	-	-
N221205	Primates	Cercopithecidae	Cercocebus	Cercocebus atys	Sooty mangabey	Nasal swab	None	2022-12-05	-	-	negative	-	-	-	-	-
N221205	Primates	Cercopithecidae	Cercocebus	Cercocebus atys	Sooty mangabey	Skin	None	2022-12-05	-	-	negative	-	-	-	-	-
N221221	Rodentia	Sciuridae	Protoxerus	Protoxerus stangeri	African Giant Squirrel	Spleen	None	2022-12-21	negative	-	-	-	-	-	-	-
N221221	Rodentia	Sciuridae	Protoxerus	Protoxerus stangeri	African Giant Squirrel	Lung	None	2022-12-21	negative	-	-	-	-	-	-	-
N221221	Rodentia	Sciuridae	Protoxerus	Protoxerus stangeri	African Giant Squirrel	Skin	None	2022-12-21	negative	-	-	-	-	-	-	-
N230111	Rodentia	Sciuridae	Protoxerus	Protoxerus stangeri	African Giant Squirrel	Spleen	None	2023-01-11	negative	-	-	-	-	-	-	-
N230111	Rodentia	Sciuridae	Protoxerus	Protoxerus stangeri	African Giant Squirrel	Lung	None	2023-01-11	negative	-	-	-	-	-	-	-
N230111	Rodentia	Sciuridae	Protoxerus	Protoxerus stangeri	African Giant Squirrel	Skin	None	2023-01-11	negative	-	-	-	-	-	-	-
N230126	Primates	Cercopithecidae	Cercocebus	Cercocebus atys	Sooty mangabey	Nasal swab	None	2023-01-26	-	-	negative	-	-	-	-	-
N230128	Primates	Cercopithecidae	Colobus	Colobus polykomos	King Colobus	Lung	None	2023-01-28	-	-	negative	-	-	-	-	-
N230207	Passeriformes	Muscicapidae	Alethe	Alethe diadematha	White-tailed alethe	Carcass swab	None	2023-02-07	-	-	negative	-	-	-	-	-
N230207	Passeriformes	Muscicapidae	Alethe	Alethe diadematha	White-tailed alethe	Skin	None	2023-02-07	-	-	negative	-	-	-	-	-
N230207	Passeriformes	Muscicapidae	Alethe	Alethe diadematha	White-tailed alethe	Spleen	None	2023-02-07	-	-	negative	-	-	-	-	-
N230207	Passeriformes	Muscicapidae	Alethe	Alethe diadematha	White-tailed alethe	Lung	None	2023-02-07	-	-	negative	-	-	-	-	-
N230211	Primates	Cercopithecidae	Cercopithecus	Cercopithecus diana	Diana monkey	Muscle	None	2023-02-11	-	-	negative	-	-	-	-	-
N230211	Primates	Cercopithecidae	Cercopithecus	Cercopithecus diana	Diana monkey	Stomach	None	2023-02-11	-	-	negative	-	-	-	-	-
N230211	Primates	Cercopithecidae	Cercopithecus	Cercopithecus diana	Diana monkey	Large intestine	None	2023-02-11	-	-	negative	-	-	-	-	-
N230211	Primates	Cercopithecidae	Cercopithecus	Cercopithecus diana	Diana monkey	Small intestine	None	2023-02-11	-	-	negative	-	-	-	-	-
N240610	Rodentia	Sciuridae	NA	NA	Squirrel	Spleen	None	2024-06-10	negative	-	-	-	-	-	-	-
N240610	Rodentia	Sciuridae	NA	NA	Squirrel	Lung	None	2024-06-10	negative	-	-	-	-	-	-	-
N240610	Rodentia	Sciuridae	NA	NA	Squirrel	Skin	None	2024-06-10	negative	-	-	-	-	-	-	-
N240930	Rodentia	Muridae	Praomys	Praomys tullbergi	Tullberg's soft-furred mouse	Skin	NAP buffer	2024-09-30	negative	-	-	-	-	-	-	-
N240930	Rodentia	Muridae	Praomys	Praomys tullbergi	Tullberg's soft-furred mouse	Muscle	NAP buffer	2024-09-30	negative	-	-	-	-	-	-	-
N241103	Rodentia	Anomaluridae	Anomalurus	Anomalurus derbianus	Lord Derby's scaly-tailed squirrel	Spleen	None	2024-11-03	negative	-	-	-	-	-	-	-
N241103	Rodentia	Anomaluridae	Anomalurus	Anomalurus derbianus	Lord Derby's scaly-tailed squirrel	Lung	None	2024-11-03	negative	-	-	-	-	-	-	-
N241103	Rodentia	Anomaluridae	Anomalurus	Anomalurus derbianus	Lord Derby's scaly-tailed squirrel	Skin	None	2024-11-03	negative	-	-	-	-	-	-	-
N241103	Rodentia	Anomaluridae	Anomalurus	Anomalurus derbianus	Lord Derby's scaly-tailed squirrel fetus	Lung	None	2024-11-03	negative	-	-	-	-	-	-	-
N241103	Rodentia	Anomaluridae	Anomalurus	Anomalurus derbianus	Lord Derby's scaly-tailed squirrel fetus	Spleen	None	2024-11-03	negative	-	-	-	-	-	-	-
NA=Not Available

## Sheet: Supp. Table 6- Fly DNA 
Supplementary Table 6 - Reanalysis of fly DNA metabarcoding data set
Sample ID	File name	Read	Location	Coordinates (Start)	Coordinates (End)	Date	Post-filtering merged reads	Amplicon included	Hits sooty mangabey	Proportion sooty mangabey	Detection sooty mangabey	Hits red-footed rope squirrel	Proportion red-footed rope squirrel	Detection red-footed rope squirrel
5806	220506_22-07871_5806_S126_L000_R1_001.fastq.gz	Forward	Primary forest	N5 50.667 W7 19.946	N5 50.679 W7 19.871	2021-08-04	21936	yes	30	0.00136761	yes	0	0	no
5807	220506_22-07872_5807_S127_L000_R1_001.fastq.gz	Forward	Primary forest	N5 50.667 W7 19.946	N5 50.679 W7 19.871	2021-08-04	10054	yes	3872	0.38512	yes	0	0	no
5808	220506_22-07873_5808_S128_L000_R1_001.fastq.gz	Forward	Primary forest	N5 50.667 W7 19.946	N5 50.679 W7 19.871	2021-08-04	23466	yes	264	0.0112503	yes	0	0	no
5809	220506_22-07874_5809_S129_L000_R1_001.fastq.gz	Forward	Primary forest	N5 50.667 W7 19.946	N5 50.679 W7 19.871	2021-08-04	27104	yes	395	0.0145735	yes	0	0	no
5810	220506_22-07875_5810_S130_L000_R1_001.fastq.gz	Forward	Primary forest	N5 50.667 W7 19.946	N5 50.679 W7 19.871	2021-08-04	21055	yes	1997	0.0948468	yes	0	0	no
5811	220506_22-07876_5811_S131_L000_R1_001.fastq.gz	Forward	Primary forest	N5 50.667 W7 19.946	N5 50.679 W7 19.871	2021-08-04	24908	yes	536	0.0215192	yes	0	0	no
5812	220506_22-07877_5812_S132_L000_R1_001.fastq.gz	Forward	Primary forest	N5 50.667 W7 19.946	N5 50.679 W7 19.871	2021-08-04	16856	yes	3300	0.195776	yes	0	0	no
5813	220506_22-07878_5813_S133_L000_R1_001.fastq.gz	Forward	Primary forest	N5 50.147 W7 19.897	N5 50.154 W7 19.816	2021-08-04	22381	yes	1060	0.0473616	yes	0	0	no
5814	220506_22-07879_5814_S134_L000_R1_001.fastq.gz	Forward	Primary forest	N5 50.147 W7 19.897	N5 50.154 W7 19.816	2021-08-04	14660	yes	2517	0.171692	yes	0	0	no
5815	220506_22-07880_5815_S135_L000_R1_001.fastq.gz	Forward	Primary forest	N5 49.613 W7 19.881	N5 49.617 W7 19.802	2021-08-04	13906	yes	3035	0.218251	yes	0	0	no
5816	220506_22-07881_5816_S136_L000_R1_001.fastq.gz	Forward	Primary forest	N5 49.613 W7 19.881	N5 49.617 W7 19.802	2021-08-04	21633	yes	2493	0.115241	yes	0	0	no
5817	220506_22-07882_5817_S137_L000_R1_001.fastq.gz	Forward	Primary forest	N5 49.613 W7 19.881	N5 49.617 W7 19.802	2021-08-04	15906	yes	244	0.0153401	yes	0	0	no
5818	220506_22-07883_5818_S138_L000_R1_001.fastq.gz	Forward	Primary forest	N5 50.667 W7 19.946	N5 50.679 W7 19.871	2021-08-06	19446	yes	372	0.0191299	yes	0	0	no
5819	220506_22-07884_5819_S139_L000_R1_001.fastq.gz	Forward	Primary forest	N5 50.667 W7 19.946	N5 50.679 W7 19.871	2021-08-06	3107	yes	146	0.0469907	yes	0	0	no
5820	220506_22-07885_5820_S140_L000_R1_001.fastq.gz	Forward	Primary forest	N5 50.667 W7 19.946	N5 50.679 W7 19.871	2021-08-06	13384	yes	194	0.0144949	yes	0	0	no
5821	220506_22-07886_5821_S141_L000_R1_001.fastq.gz	Forward	Primary forest	N5 50.667 W7 19.946	N5 50.679 W7 19.871	2021-08-06	20	no	0	0	no	0	0	no
5822	220506_22-07887_5822_S142_L000_R1_001.fastq.gz	Forward	Primary forest	N5 50.667 W7 19.946	N5 50.679 W7 19.871	2021-08-06	20665	yes	1882	0.0910719	yes	0	0	no
5823	220506_22-07888_5823_S143_L000_R1_001.fastq.gz	Forward	Primary forest	N5 50.667 W7 19.946	N5 50.679 W7 19.871	2021-08-06	9975	yes	6	0.000601504	no	0	0	no
5824	220506_22-07889_5824_S144_L000_R1_001.fastq.gz	Forward	Primary forest	N5 50.667 W7 19.946	N5 50.679 W7 19.871	2021-08-06	16162	yes	455	0.0281525	yes	0	0	no
5825	220506_22-07890_5825_S145_L000_R1_001.fastq.gz	Forward	Primary forest	N5 50.667 W7 19.946	N5 50.679 W7 19.871	2021-08-06	11599	yes	633	0.0545737	yes	0	0	no
5826	220506_22-07891_5826_S146_L000_R1_001.fastq.gz	Forward	Primary forest	N5 50.147 W7 19.897	N5 50.154 W7 19.816	2021-08-06	9641	yes	1366	0.141687	yes	0	0	no
5827	220506_22-07892_5827_S147_L000_R1_001.fastq.gz	Forward	Primary forest	N5 50.147 W7 19.897	N5 50.154 W7 19.816	2021-08-06	12347	yes	147	0.0119057	yes	0	0	no
5828	220506_22-07893_5828_S148_L000_R1_001.fastq.gz	Forward	Primary forest	N5 50.147 W7 19.897	N5 50.154 W7 19.816	2021-08-06	14808	yes	5694	0.384522	yes	0	0	no
5829	220506_22-07894_5829_S149_L000_R1_001.fastq.gz	Forward	Primary forest	N5 50.147 W7 19.897	N5 50.154 W7 19.816	2021-08-06	18660	yes	101	0.00541265	yes	0	0	no
5830	220506_22-07895_5830_S150_L000_R1_001.fastq.gz	Forward	Primary forest	N5 49.613 W7 19.881	N5 49.617 W7 19.802	2021-08-06	2017	yes	412	0.204264	yes	0	0	no
5831	220506_22-07896_5831_S151_L000_R1_001.fastq.gz	Forward	Cacao field- secondary forest	N5 51.280 W7 24.199	N5 51.317 W7 24.128	2021-08-15	16392	yes	97	0.00591752	yes	0	0	no
5832	220506_22-07897_5832_S152_L000_R1_001.fastq.gz	Forward	Cacao field- secondary forest	N5 51.280 W7 24.199	N5 51.317 W7 24.128	2021-08-15	13273	yes	3	0.000226023	no	0	0	no
5833	220506_22-07898_5833_S153_L000_R1_001.fastq.gz	Forward	Cacao field- secondary forest	N5 51.280 W7 24.199	N5 51.317 W7 24.128	2021-08-15	22066	yes	0	0	no	0	0	no
5834	220506_22-07899_5834_S154_L000_R1_001.fastq.gz	Forward	Cacao field- secondary forest	N5 51.280 W7 24.199	N5 51.317 W7 24.128	2021-08-15	22501	yes	10	0.000444425	no	0	0	no
5835	220506_22-07900_5835_S155_L000_R1_001.fastq.gz	Forward	Cacao field- secondary forest	N5 51.280 W7 24.199	N5 51.317 W7 24.128	2021-08-17	161	no	6	0.0372671	no	0	0	no
5836	220506_22-07901_5836_S156_L000_R1_001.fastq.gz	Forward	Cacao field- secondary forest	N5 51.280 W7 24.199	N5 51.317 W7 24.128	2021-08-17	17712	yes	22	0.0012421	yes	0	0	no
5837	220506_22-07902_5837_S157_L000_R1_001.fastq.gz	Forward	Cacao field- secondary forest	N5 51.280 W7 24.199	N5 51.317 W7 24.128	2021-08-17	15296	yes	1445	0.0944691	yes	0	0	no
5838	220506_22-07903_5838_S158_L000_R1_001.fastq.gz	Forward	Cacao field- secondary forest	N5 51.280 W7 24.199	N5 51.317 W7 24.128	2021-08-17	21248	yes	0	0	no	0	0	no
5839	220506_22-07904_5839_S159_L000_R1_001.fastq.gz	Forward	Cacao field- secondary forest	N5 51.280 W7 24.199	N5 51.317 W7 24.128	2021-08-15	2347	yes	2	0.000852152	no	0	0	no
5840	220506_22-07905_5840_S160_L000_R1_001.fastq.gz	Forward	Cacao field- secondary forest	N5 51.280 W7 24.199	N5 51.317 W7 24.128	2021-08-15	15922	yes	1547	0.0971612	yes	0	0	no
5841	220506_22-07906_5841_S161_L000_R1_001.fastq.gz	Forward	Cacao field- secondary forest	N5 51.280 W7 24.199	N5 51.317 W7 24.128	2021-08-15	12079	yes	0	0	no	0	0	no
5842	220506_22-07907_5842_S162_L000_R1_001.fastq.gz	Forward	Cacao field- secondary forest	N5 51.280 W7 24.199	N5 51.317 W7 24.128	2021-08-15	39489	yes	0	0	no	0	0	no
5843	220506_22-07908_5843_S163_L000_R1_001.fastq.gz	Forward	Cacao field- secondary forest	N5 51.280 W7 24.199	N5 51.317 W7 24.128	2021-08-17	16112	yes	299	0.0185576	yes	0	0	no
5844	220506_22-07909_5844_S164_L000_R1_001.fastq.gz	Forward	Cacao field- secondary forest	N5 51.280 W7 24.199	N5 51.317 W7 24.128	2021-08-17	46394	yes	52	0.00112083	yes	156	0.0033625	yes
5845	220506_22-07910_5845_S165_L000_R1_001.fastq.gz	Forward	Cacao field- secondary forest	N5 51.280 W7 24.199	N5 51.317 W7 24.128	2021-08-17	19588	yes	0	0	no	108	0.00551358	yes
5846	220506_22-07911_5846_S166_L000_R1_001.fastq.gz	Forward	Cacao field- secondary forest	N5 51.280 W7 24.199	N5 51.317 W7 24.128	2021-08-17	19946	yes	0	0	no	0	0	no
5847	220506_22-07912_5847_S167_L000_R1_001.fastq.gz	Forward	Cacao field- secondary forest	N5 50.228 W7 23.639	N5 50.265 W7 23.565	2021-08-15	18606	yes	50	0.00268731	yes	0	0	no
5848	220506_22-07913_5848_S168_L000_R1_001.fastq.gz	Forward	Cacao field- secondary forest	N5 50.228 W7 23.639	N5 50.265 W7 23.565	2021-08-15	28330	yes	108	0.00381221	yes	0	0	no
5849	220506_22-07914_5849_S169_L000_R1_001.fastq.gz	Forward	Cacao field- secondary forest	N5 50.228 W7 23.639	N5 50.265 W7 23.565	2021-08-15	12580	yes	1	7.94913e-05	no	0	0	no
5850	220506_22-07915_5850_S170_L000_R1_001.fastq.gz	Forward	Cacao field- secondary forest	N5 50.228 W7 23.639	N5 50.265 W7 23.565	2021-08-15	13719	yes	1	7.28916e-05	no	0	0	no
5851	220506_22-07916_5851_S171_L000_R1_001.fastq.gz	Forward	Cacao field- secondary forest	N5 50.228 W7 23.639	N5 50.265 W7 23.565	2021-08-15	25291	yes	1	3.95398e-05	no	0	0	no
5852	220506_22-07917_5852_S172_L000_R1_001.fastq.gz	Forward	Cacao field- secondary forest	N5 50.228 W7 23.639	N5 50.265 W7 23.565	2021-08-15	33048	yes	0	0	no	0	0	no
5853	220506_22-07918_5853_S173_L000_R1_001.fastq.gz	Forward	Cacao field- secondary forest	N5 50.228 W7 23.639	N5 50.265 W7 23.565	2021-08-17	34	no	0	0	no	0	0	no
5854	220506_22-07919_5854_S174_L000_R1_001.fastq.gz	Forward	Cacao field- secondary forest	N5 50.228 W7 23.639	N5 50.265 W7 23.565	2021-08-17	123	no	0	0	no	0	0	no
5855	220506_22-07920_5855_S175_L000_R1_001.fastq.gz	Forward	Cacao field- secondary forest	N5 50.228 W7 23.639	N5 50.265 W7 23.565	2021-08-15	21661	yes	0	0	no	0	0	no
5856	220506_22-07921_5856_S176_L000_R1_001.fastq.gz	Forward	Cacao field- secondary forest	N5 50.228 W7 23.639	N5 50.265 W7 23.565	2021-08-15	9079	yes	0	0	no	0	0	no
5857	220506_22-07922_5857_S177_L000_R1_001.fastq.gz	Forward	Cacao field- secondary forest	N5 50.228 W7 23.639	N5 50.265 W7 23.565	2021-08-15	18016	yes	9	0.000499556	no	0	0	no
5858	220506_22-07923_5858_S178_L000_R1_001.fastq.gz	Forward	Cacao field- secondary forest	N5 50.228 W7 23.639	N5 50.265 W7 23.565	15.08.2021	16686	yes	0	0	no	0	0	no
5859	220506_22-07924_5859_S179_L000_R1_001.fastq.gz	Forward	Cacao field- secondary forest	N5 50.228 W7 23.639	N5 50.265 W7 23.565	2021-08-15	15587	yes	1139	0.0730737	yes	0	0	no
5860	220506_22-07925_5860_S180_L000_R1_001.fastq.gz	Forward	Cacao field- secondary forest	N5 50.228 W7 23.639	N5 50.265 W7 23.565	2021-08-15	31	no	0	0	no	0	0	no
5861	220506_22-07926_5861_S181_L000_R1_001.fastq.gz	Forward	Cacao field- secondary forest	N5 50.228 W7 23.639	N5 50.265 W7 23.565	17.08.2021	21335	yes	2	9.37427e-05	no	0	0	no
5862	220506_22-07927_5862_S182_L000_R1_001.fastq.gz	Forward	Cacao field- secondary forest	N5 50.228 W7 23.639	N5 50.265 W7 23.565	2021-08-17	12814	yes	1	7.80396e-05	no	0	0	no
5863	220506_22-07928_5863_S183_L000_R1_001.fastq.gz	Forward	Cacao field- secondary forest	N5 50.228 W7 23.639	N5 50.265 W7 23.565	2021-08-17	23436	yes	12	0.000512033	no	0	0	no
5864	220506_22-07929_5864_S184_L000_R1_001.fastq.gz	Forward	Cacao field- secondary forest	N5 50.228 W7 23.639	N5 50.265 W7 23.565	2021-08-17	13703	yes	4504	0.328687	yes	0	0	no
5865	220506_22-07930_5865_S185_L000_R1_001.fastq.gz	Forward	Deforested area- secondary forest	N5 49.604 W7 23.312	N5 49.670 W7 23.262	2021-08-15	11966	yes	64	0.00534849	yes	0	0	no
5866	220506_22-07931_5866_S186_L000_R1_001.fastq.gz	Forward	Deforested area- secondary forest	N5 49.604 W7 23.312	N5 49.670 W7 23.262	2021-08-15	2163	yes	1	0.000462321	yes	0	0	no
5867	220506_22-07932_5867_S187_L000_R1_001.fastq.gz	Forward	Deforested area- secondary forest	N5 49.604 W7 23.312	N5 49.670 W7 23.262	15.08.2021	916	no	1	0.0010917	no	0	0	no
5868	220506_22-07933_5868_S188_L000_R1_001.fastq.gz	Forward	Deforested area- secondary forest	N5 49.604 W7 23.312	N5 49.670 W7 23.262	15.08.2021	31444	yes	1	3.18026e-05	no	0	0	no
5869	220506_22-07934_5869_S189_L000_R1_001.fastq.gz	Forward	Deforested area- secondary forest	N5 49.604 W7 23.312	N5 49.670 W7 23.262	2021-08-17	19060	yes	0	0	no	0	0	no
5870	220506_22-07935_5870_S190_L000_R1_001.fastq.gz	Forward	Deforested area- secondary forest	N5 49.604 W7 23.312	N5 49.670 W7 23.262	2021-08-17	24572	yes	3	0.00012209	no	171	0.00695914	yes
5871	220506_22-07936_5871_S191_L000_R1_001.fastq.gz	Forward	Deforested area- secondary forest	N5 49.604 W7 23.312	N5 49.670 W7 23.262	2021-08-17	28646	yes	2516	0.0878308	yes	0	0	no
5872	220506_22-07937_5872_S192_L000_R1_001.fastq.gz	Forward	Deforested area- secondary forest	N5 49.604 W7 23.312	N5 49.670 W7 23.262	17.08.2021	1144	yes	2	0.00174825	no	0	0	no
5873	220506_22-07938_5873_S193_L000_R1_001.fastq.gz	Forward	Deforested area- secondary forest	N5 49.604 W7 23.312	N5 49.670 W7 23.262	2021-08-15	5478	yes	0	0	no	0	0	no
5874	220506_22-07939_5874_S194_L000_R1_001.fastq.gz	Forward	Deforested area- secondary forest	N5 49.604 W7 23.312	N5 49.670 W7 23.262	2021-08-15	15757	yes	1037	0.065812	yes	0	0	no
5875	220506_22-07940_5875_S195_L000_R1_001.fastq.gz	Forward	Deforested area- secondary forest	N5 49.604 W7 23.312	N5 49.670 W7 23.262	15.08.2021	27	no	0	0	no	0	0	no
5876	220506_22-07941_5876_S196_L000_R1_001.fastq.gz	Forward	Deforested area- secondary forest	N5 49.604 W7 23.312	N5 49.670 W7 23.262	2021-08-15	15443	yes	0	0	no	0	0	no
5877	220506_22-07942_5877_S197_L000_R1_001.fastq.gz	Forward	Deforested area- secondary forest	N5 49.604 W7 23.312	N5 49.670 W7 23.262	2021-08-17	18991	yes	0	0	no	0	0	no
5878	220506_22-07943_5878_S198_L000_R1_001.fastq.gz	Forward	Deforested area- secondary forest	N5 49.604 W7 23.312	N5 49.670 W7 23.262	2021-08-17	21411	yes	1649	0.0770165	yes	0	0	no
5879	220506_22-07944_5879_S199_L000_R1_001.fastq.gz	Forward	Deforested area- secondary forest	N5 49.604 W7 23.312	N5 49.670 W7 23.262	2021-08-17	19575	yes	4	0.000204342	no	0	0	no
5880	220506_22-07945_5880_S200_L000_R1_001.fastq.gz	Forward	Deforested area- secondary forest	N5 49.604 W7 23.312	N5 49.670 W7 23.262	2021-08-17	23666	yes	0	0	no	0	0	no
5881	220506_22-07946_5881_S201_L000_R1_001.fastq.gz	Forward	Nearby Gouleako1	N5 50.469 W7 24.791	N5 50.546 W7 24.767	2021-09-02	14512	yes	0	0	no	0	0	no
5882	220506_22-07947_5882_S202_L000_R1_001.fastq.gz	Forward	Nearby Gouleako1	N5 50.469 W7 24.791	N5 50.546 W7 24.767	2021-09-02	25249	yes	0	0	no	1	3.96055e-05	no
5883	220506_22-07948_5883_S203_L000_R1_001.fastq.gz	Forward	Nearby Gouleako1	N5 50.469 W7 24.791	N5 50.546 W7 24.767	2021-09-02	25572	yes	0	0	no	1	3.91053e-05	no
5884	220506_22-07949_5884_S204_L000_R1_001.fastq.gz	Forward	Nearby Gouleako1	N5 50.469 W7 24.791	N5 50.546 W7 24.767	2021-09-02	19	no	0	0	no	2	0.105263	no
5885	220506_22-07950_5885_S205_L000_R1_001.fastq.gz	Forward	Nearby Gouleako1	N5 50.469 W7 24.791	N5 50.546 W7 24.767	2021-09-02	22	no	1	0.0454545	no	0	0	no
5886	220506_22-07951_5886_S206_L000_R1_001.fastq.gz	Forward	Nearby Gouleako1	N5 50.469 W7 24.791	N5 50.546 W7 24.767	2021-09-02	341	no	1	0.00293255	no	0	0	no
5887	220506_22-07952_5887_S207_L000_R1_001.fastq.gz	Forward	Nearby Gouleako1	N5 50.469 W7 24.791	N5 50.546 W7 24.767	2021-09-04	4724	yes	1	0.000211685	no	0	0	no
5888	220506_22-07953_5888_S208_L000_R1_001.fastq.gz	Forward	Nearby Gouleako1	N5 50.469 W7 24.791	N5 50.546 W7 24.767	2021-09-04	46993	yes	0	0	no	0	0	no
5889	220506_22-07954_5889_S209_L000_R1_001.fastq.gz	Forward	Nearby Gouleako1	N5 50.469 W7 24.791	N5 50.546 W7 24.767	2021-09-04	21868	yes	0	0	no	0	0	no
5890	220506_22-07955_5890_S210_L000_R1_001.fastq.gz	Forward	Nearby Gouleako1	N5 50.469 W7 24.791	N5 50.546 W7 24.767	2021-09-04	21087	yes	0	0	no	0	0	no
5891	220506_22-07956_5891_S211_L000_R1_001.fastq.gz	Forward	Nearby Gouleako1	N5 50.469 W7 24.791	N5 50.546 W7 24.767	2021-09-04	4275	yes	0	0	no	0	0	no
5892	220506_22-07957_5892_S212_L000_R1_001.fastq.gz	Forward	Nearby Gouleako1	N5 50.469 W7 24.791	N5 50.546 W7 24.767	2021-09-04	19299	yes	1	5.18162e-05	no	0	0	no
5893	220506_22-07958_5893_S213_L000_R1_001.fastq.gz	Forward	Nearby Gouleako2	N5 50.177 W7 24.334	N5 50.090 W7 24.356	2021-09-02	25244	yes	0	0	no	0	0	no
5894	220506_22-07959_5894_S214_L000_R1_001.fastq.gz	Forward	Nearby Gouleako2	N5 50.177 W7 24.334	N5 50.090 W7 24.356	2021-09-02	18957	yes	1	5.2751e-05	no	0	0	no
5895	220506_22-07960_5895_S215_L000_R1_001.fastq.gz	Forward	Nearby Gouleako2	N5 50.177 W7 24.334	N5 50.090 W7 24.356	2021-09-02	10406	yes	0	0	no	0	0	no
5896	220506_22-07961_5896_S216_L000_R1_001.fastq.gz	Forward	Nearby Gouleako2	N5 50.177 W7 24.334	N5 50.090 W7 24.356	2021-09-02	25401	yes	1	3.93685e-05	no	0	0	no
5897	220506_22-07962_5897_S217_L000_R1_001.fastq.gz	Forward	Nearby Gouleako2	N5 50.177 W7 24.334	N5 50.090 W7 24.356	2021-09-04	26514	yes	0	0	no	0	0	no
5898	220506_22-07963_5898_S218_L000_R1_001.fastq.gz	Forward	Nearby Gouleako2	N5 50.177 W7 24.334	N5 50.090 W7 24.356	2021-09-04	16904	yes	0	0	no	0	0	no
5899	220506_22-07964_5899_S219_L000_R1_001.fastq.gz	Forward	Nearby Gouleako2	N5 50.177 W7 24.334	N5 50.090 W7 24.356	2021-09-04	28992	yes	0	0	no	0	0	no
5900	220506_22-07965_5900_S220_L000_R1_001.fastq.gz	Forward	Nearby Gouleako2	N5 50.177 W7 24.334	N5 50.090 W7 24.356	2021-09-04	17927	yes	1	5.57818e-05	no	0	0	no
5901	220506_22-07966_5901_S221_L000_R1_001.fastq.gz	Forward	Nearby Gouleako2	N5 50.177 W7 24.334	N5 50.090 W7 24.356	2021-09-04	20650	yes	1	4.84262e-05	no	0	0	no
5902	220506_22-07967_5902_S222_L000_R1_001.fastq.gz	Forward	Nearby pauleoula	N5 49.196 W7 23.798	N5 49.251 W7 23.738	2021-09-02	13009	yes	0	0	no	0	0	no
5903	220506_22-07968_5903_S223_L000_R1_001.fastq.gz	Forward	Nearby pauleoula	N5 49.196 W7 23.798	N5 49.251 W7 23.738	2021-09-02	13382	yes	1	7.47272e-05	no	0	0	no
5904	220506_22-07969_5904_S224_L000_R1_001.fastq.gz	Forward	Nearby pauleoula	N5 49.196 W7 23.798	N5 49.251 W7 23.738	2021-09-04	12929	yes	1	7.73455e-05	no	0	0	no
5905	220506_22-07970_5905_S225_L000_R1_001.fastq.gz	Forward	Nearby pauleoula	N5 49.196 W7 23.798	N5 49.251 W7 23.738	2021-09-04	13187	yes	1	7.58323e-05	no	0	0	no
Negative control	220506_22-07971_NTC_S226_L000_R1_001.fastq.gz	Forward	Negative control				13	no	0	0	no	0	0	no
